# Supplementary material for: Pathway analysis with genome-wide association study (GWAS) data detected the association of atrial fibrillation with the mTOR signaling pathway
Source: PubMed Central journal article supplement — Int J Cardiol Heart Vasc. 2019 Jul 4;24:100383. doi: 10.1016/j.ijcha.2019.100383 (PMC6612921; doi:10.1016/j.ijcha.2019.100383), 2019-07-04

Probe Log2 Intensity Histogram - (1)

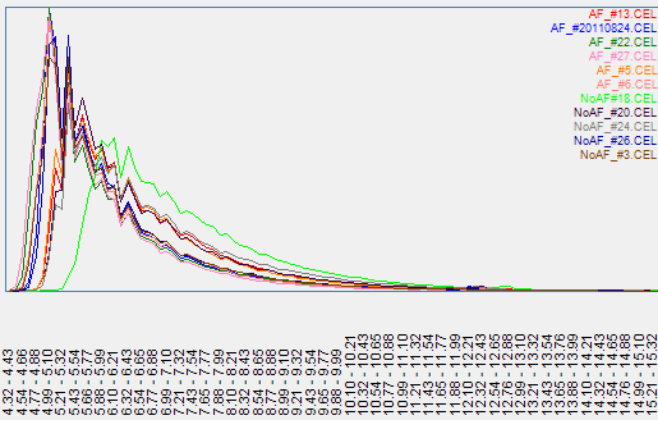

Signal Histogram - MAS5 - (2)

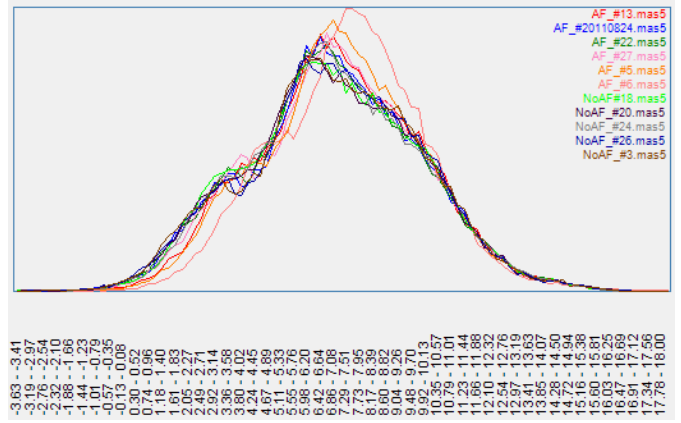

Log Probe Cell Intensity - (3)

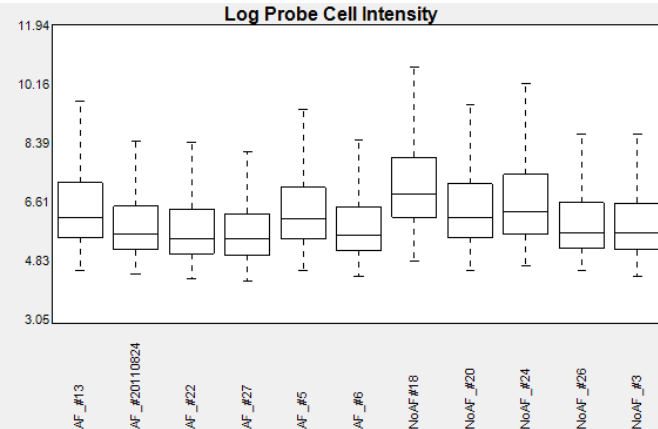

Relative Log Probe Cell Intensity - (4)

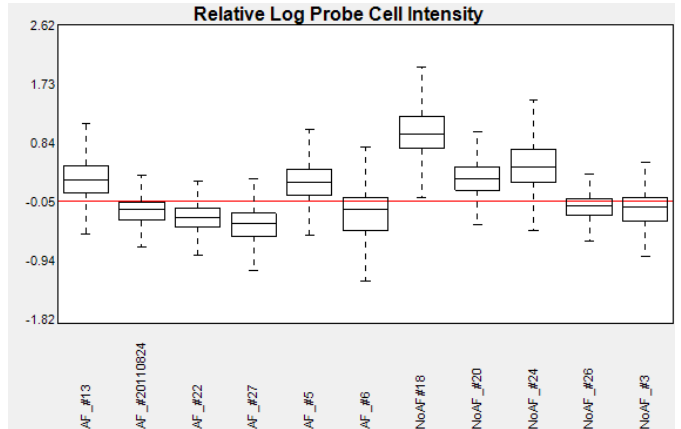

Log Expression Signal - MAS5 - (5)

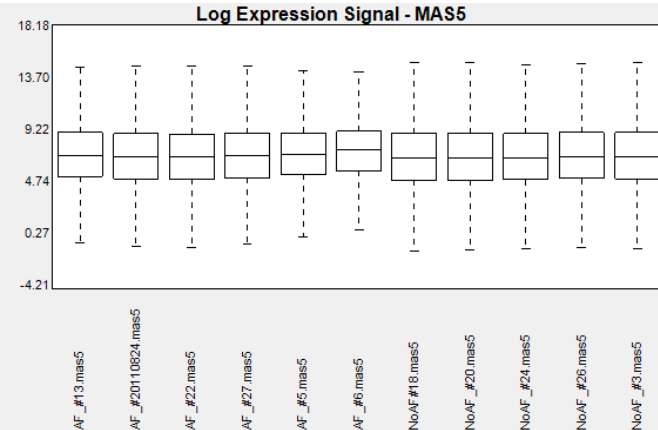

Relative Log Expression Signal - MAS5 - (6)

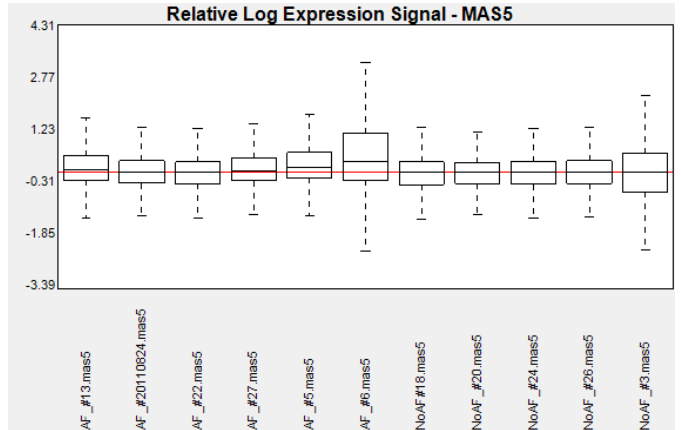

Supplement: mmc1.pdf [file mmc1.pdf]
