# Supplementary material for: Pathway analysis with genome-wide association study (GWAS) data detected the association of atrial fibrillation with the mTOR signaling pathway
Source: PubMed Central journal article supplement — Int J Cardiol Heart Vasc. 2019 Jul 4;24:100383. doi: 10.1016/j.ijcha.2019.100383 (PMC6612921; doi:10.1016/j.ijcha.2019.100383), 2019-07-04
Supplement: mmc2.pdf [file mmc2.pdf]

Supplementary Figure 2A. Scatter plot of array data

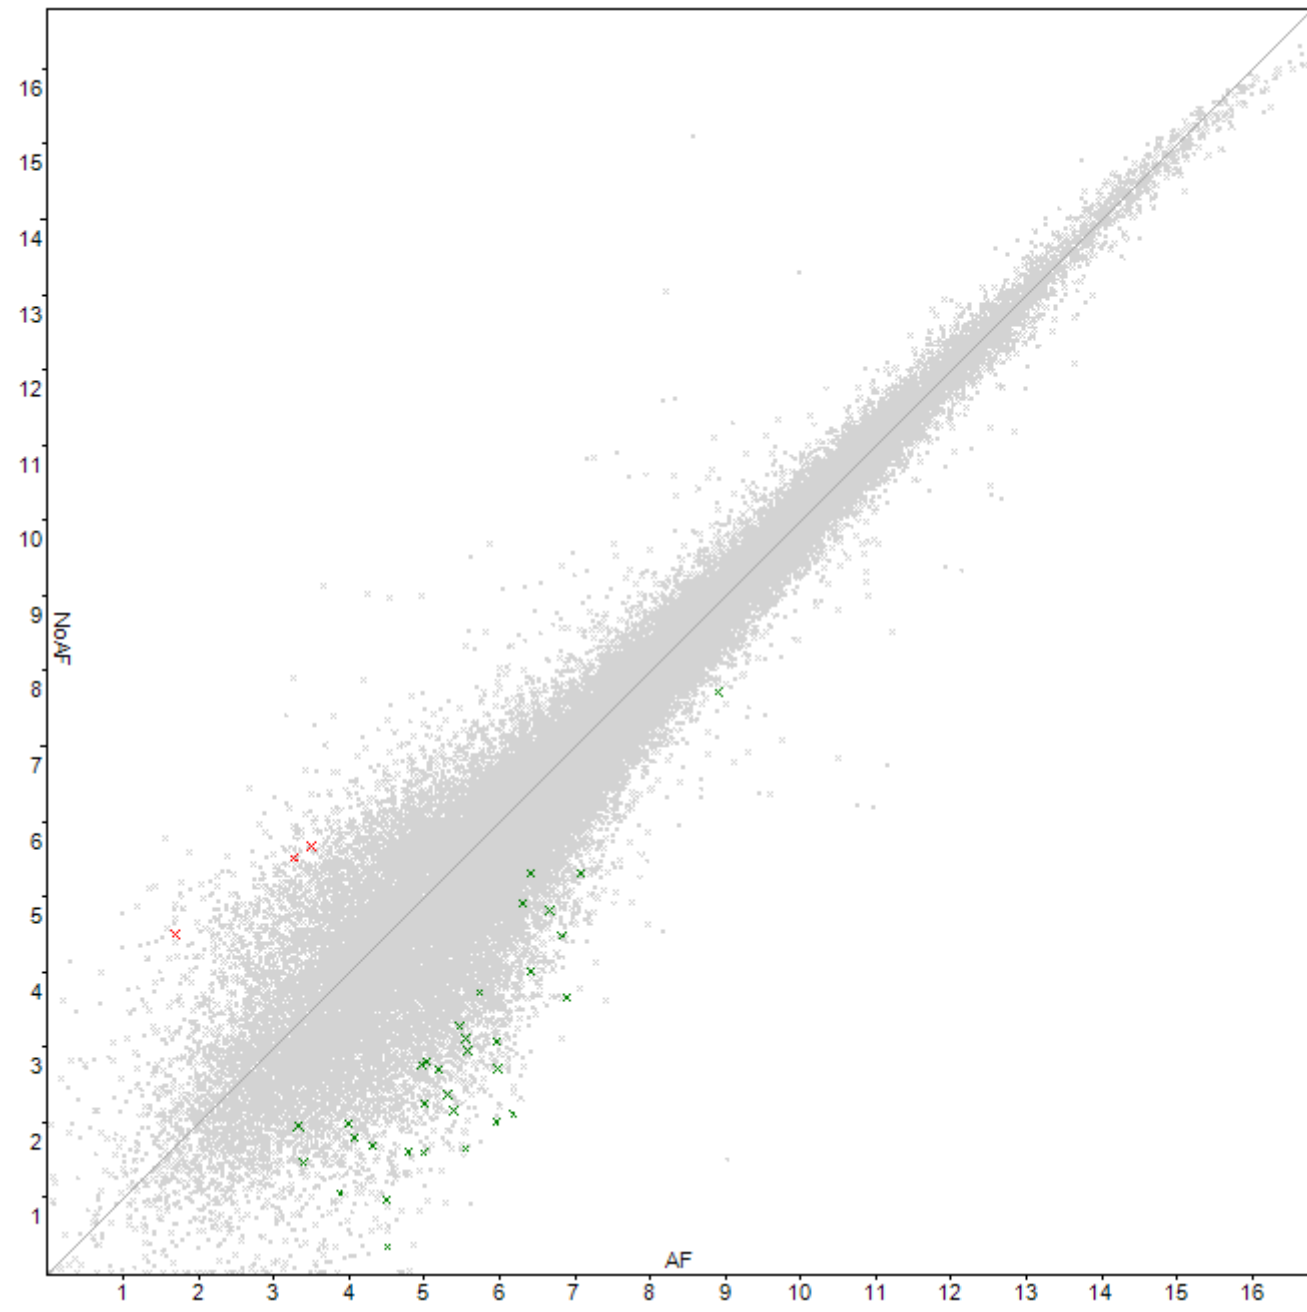

Filter P<0.001\_Scatter Plot

Supplementary Figure 2B. Volcano plot of array data

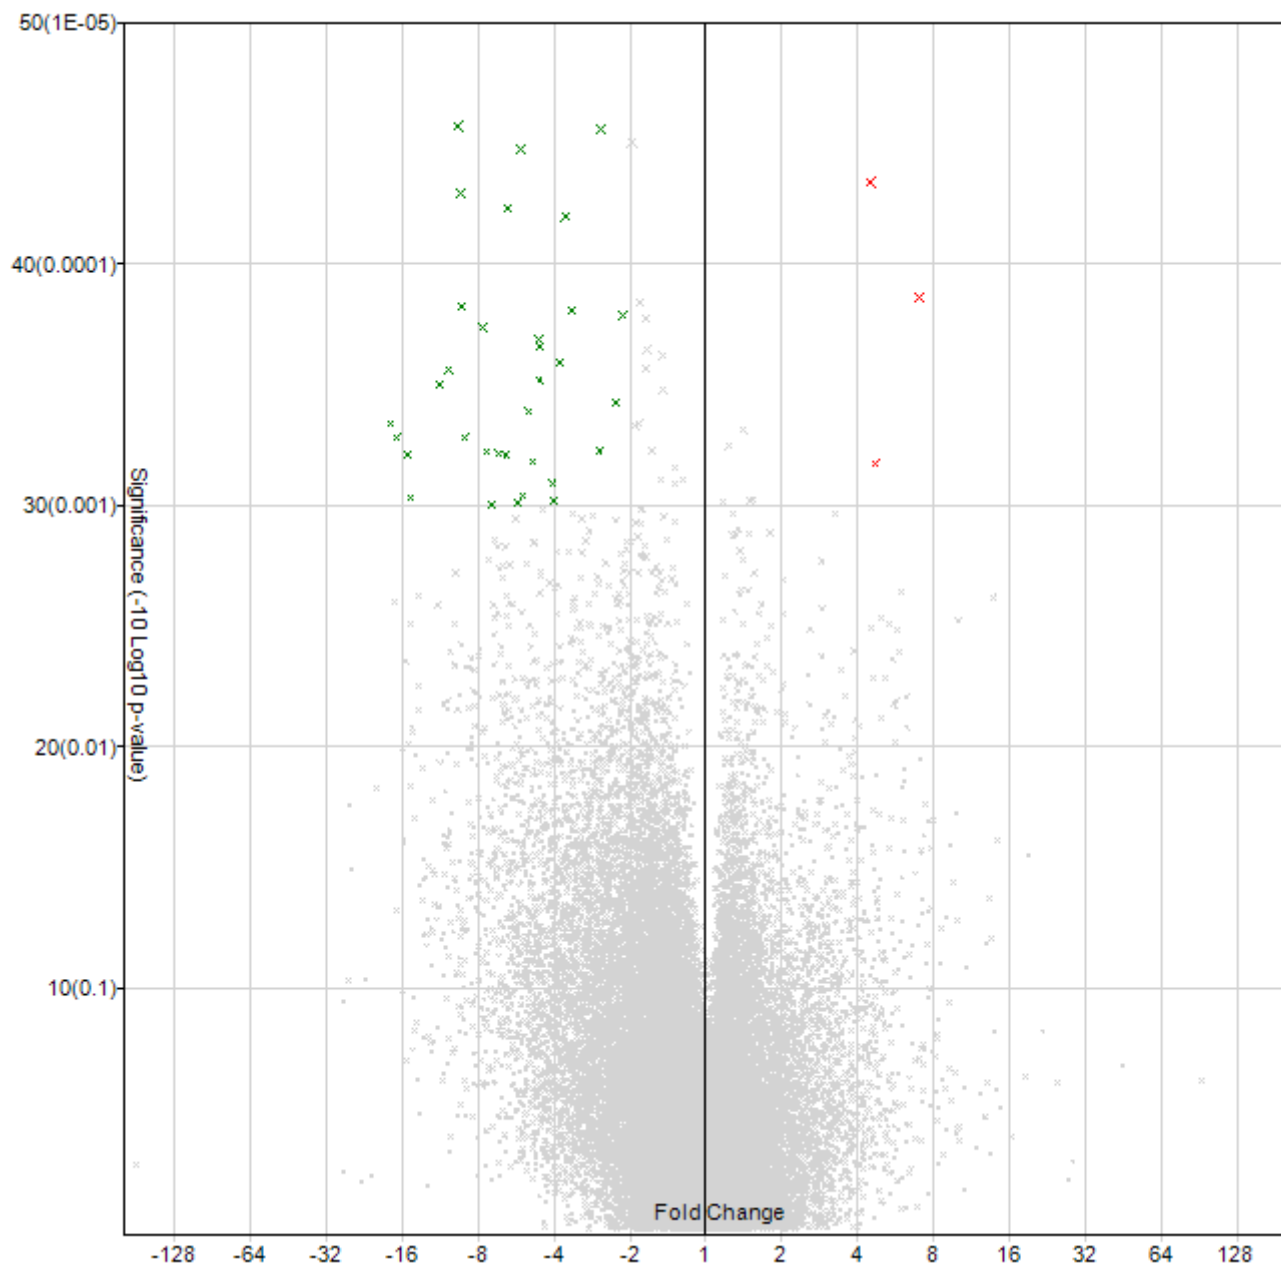

Filter P<0.001\_Volcano Plot
