# Supplementary material for: Pathway analysis with genome-wide association study (GWAS) data detected the association of atrial fibrillation with the mTOR signaling pathway
Source: PubMed Central journal article supplement — Int J Cardiol Heart Vasc. 2019 Jul 4;24:100383. doi: 10.1016/j.ijcha.2019.100383 (PMC6612921; doi:10.1016/j.ijcha.2019.100383), 2019-07-04
Supplement: mmc3.pdf [file mmc3.pdf]

Supplementary Table 1. Transcriptome data of GeneChip® Human Genome U133Plus2.0 Array (Affymetrix)

| Transcript Cluster ID(Affymetrix) | Fold Change | ANOVA p-value (NoAF vs. AF) | FDR p-value (NoAF vs. AF) | Gene Symbol  | Description                                                                 |
|-----------------------------------|-------------|-----------------------------|---------------------------|--------------|-----------------------------------------------------------------------------|
| 235622_at                         | -9.64       | 0.000027                    | 0.433878                  |              |                                                                             |
| 231275_at                         | -2.6        | 0.000028                    | 0.433878                  | LINC00982    | long intergenic non-protein coding RNA 982                                  |
| 1552674_at                        | -5.43       | 0.000033                    | 0.433878                  | DIRC1        | disrupted in renal carcinoma 1                                              |
| 213819_s_at                       | 4.51        | 0.000046                    | 0.433878                  | FLOT1        | flotillin 1                                                                 |
| 1563027_at                        | -9.41       | 0.000051                    | 0.433878                  | LOC101927406 | uncharacterized LOC101927406                                                |
| 1565733_at                        | -6.12       | 0.000059                    | 0.433878                  |              |                                                                             |
| 240223_at                         | -3.62       | 0.000064                    | 0.433878                  | SLC2A9       | solute carrier family 2 (facilitated glucose transporter), member 9         |
| 224114_at                         | 6.98        | 0.000137                    | 0.652373                  |              |                                                                             |
| 237662_at                         | -9.38       | 0.00015                     | 0.652373                  | SPATA19      | spermatogenesis associated 19                                               |
| 214907_at                         | -3.39       | 0.000156                    | 0.652373                  | CEACAM21     | carcinoembryonic antigen-related cell adhesion molecule 21                  |
| 1569936_a_at                      | -2.15       | 0.000163                    | 0.652373                  | ZNF664       | zinc finger protein 664                                                     |
| 215686_x_at                       | -7.67       | 0.000182                    | 0.664338                  | TFAP2B       | transcription factor AP-2 beta (activating enhancer binding protein 2 beta) |
| 1569064_at                        | -4.62       | 0.000204                    | 0.68069                   | C15orf62     | chromosome 15 open reading frame 62                                         |
| 216808_at                         | -4.57       | 0.000218                    | 0.68069                   | MIR622       | microRNA 622                                                                |
| 239125_at                         | -3.79       | 0.000256                    | 0.68069                   | SLC25A5-AS1  | SLC25A5 antisense RNA 1                                                     |

|              |        |          |          |              |                                                 |
|--------------|--------|----------|----------|--------------|-------------------------------------------------|
| 1553934_at   | -10.51 | 0.000274 | 0.68069  | LINC00305    | long intergenic non-protein coding RNA 305      |
| 216825_s_at  | -4.58  | 0.000301 | 0.715214 | MPL          | MPL proto-oncogene, thrombopoietin receptor     |
| 233789_at    | -11.44 | 0.000315 | 0.717205 |              |                                                 |
| 242500_at    | -2.28  | 0.000374 | 0.786258 |              |                                                 |
| 241486_at    | -5.08  | 0.000407 | 0.811585 |              |                                                 |
| 1560491_at   | -17.88 | 0.000457 | 0.811585 | LOC102546299 | uncharacterized LOC102546299                    |
| 1561519_at   | -16.83 | 0.000522 | 0.811585 | LOC101927346 | uncharacterized LOC101927346                    |
| 1569580_a_at | -9.04  | 0.000522 | 0.811585 |              |                                                 |
| 244005_at    | -2.66  | 0.000593 | 0.811585 |              |                                                 |
| 206699_x_at  | -7.43  | 0.000601 | 0.811585 | NPAS1        | neuronal PAS domain protein 1                   |
| 229152_at    | -6.69  | 0.000609 | 0.811585 | FDCSP        | follicular dendritic cell secreted protein      |
| 1556166_x_at | -15.27 | 0.000615 | 0.811585 | LOC100505727 | uncharacterized LOC100505727                    |
| 1556529_a_at | -6.19  | 0.000616 | 0.811585 | LINC00692    | long intergenic non-protein coding RNA 692      |
| 1553089_a_at | -4.87  | 0.000656 | 0.811585 | WFDC2        | WAP four-disulfide core domain 2                |
| 1560698_a_at | 4.72   | 0.00067  | 0.811585 | TRHDE-AS1    | TRHDE antisense RNA 1                           |
| 235724_at    | -4.06  | 0.000805 | 0.811585 | ACSS1        | acyl-CoA synthetase short-chain family member 1 |
| 211500_at    | -5.32  | 0.000911 | 0.811585 | MAPK11       | mitogen-activated protein kinase 11             |
| 1570284_x_at | -14.9  | 0.000926 | 0.811585 |              |                                                 |

|              |       |          |          |              |                                                        |
|--------------|-------|----------|----------|--------------|--------------------------------------------------------|
| 1558481_s_at | -3.99 | 0.000957 | 0.811585 | TMCC1-AS1    | TMCC1 antisense RNA 1 (head to head)                   |
| 205605_at    | -5.59 | 0.000977 | 0.811585 | HOXD9        | homeobox D9                                            |
| 215117_at    | -7.09 | 0.000998 | 0.811585 | RAG2         | recombination activating gene 2                        |
| 234308_at    | -4.44 | 0.001043 | 0.811585 | TUBGCP6      | tubulin, gamma complex associated protein 6            |
| 221183_at    | -3.37 | 0.001081 | 0.811585 | LOC100507388 | uncharacterized LOC100507388                           |
| 204579_at    | 3.27  | 0.001084 | 0.811585 | FGFR4        | fibroblast growth factor receptor 4                    |
| 235568_at    | -2.82 | 0.001109 | 0.811585 | MCEMP1       | mast cell-expressed membrane protein 1                 |
| 238159_at    | -3.13 | 0.001136 | 0.811585 |              |                                                        |
| 1558832_at   | -5.69 | 0.001143 | 0.811585 | SLC2A1-AS1   | SLC2A1 antisense RNA 1                                 |
| 242197_x_at  | -2.26 | 0.001157 | 0.811585 | CD36         | CD36 molecule (thrombospondin receptor)                |
| 217108_at    | -2.9  | 0.001282 | 0.811585 |              |                                                        |
| 243122_at    | -6.94 | 0.001392 | 0.811585 | LOC729658    | uncharacterized LOC729658                              |
| 203134_at    | -3    | 0.001406 | 0.811585 | PICALM       | phosphatidylinositol binding clathrin assembly protein |
| 227642_at    | -4.8  | 0.001408 | 0.811585 | TFCP2L1      | transcription factor CP2-like 1                        |
| 242535_at    | -2.06 | 0.001425 | 0.811585 |              |                                                        |
| 239627_at    | -4.86 | 0.00143  | 0.811585 |              |                                                        |
| 215943_at    | -6.71 | 0.001472 | 0.811585 | KIAA1661     | KIAA1661 protein                                       |
| 1569768_at   | -6.27 | 0.001483 | 0.811585 |              |                                                        |

|              |       |          |          |               |                                                          |
|--------------|-------|----------|----------|---------------|----------------------------------------------------------|
| 208603_s_at  | -2.08 | 0.001527 | 0.811585 | MAPK8IP2      | mitogen-activated protein kinase 8 interacting protein 2 |
| 1552751_a_at | -3.9  | 0.001555 | 0.811585 | CIB3          | calcium and integrin binding family member 3             |
| 232828_at    | -3.11 | 0.001564 | 0.811585 | NALCN-AS1     | NALCN antisense RNA 1                                    |
| 208574_at    | -3.51 | 0.001565 | 0.811585 | SOX14         | SRY (sex determining region Y)-box 14                    |
| 235218_x_at  | -2.16 | 0.001587 | 0.811585 | THAP6         | THAP domain containing 6                                 |
| 237011_at    | -7.34 | 0.001683 | 0.811585 | LINC01128     | long intergenic non-protein coding RNA 1128              |
| 220444_at    | 2.87  | 0.0017   | 0.811585 | ZNF557        | zinc finger protein 557                                  |
| 1564552_at   | -2.51 | 0.001735 | 0.811585 | RP11-678G15.1 |                                                          |
| 229229_at    | -5.15 | 0.001737 | 0.811585 | AGXT2         | alanine--glyoxylate aminotransferase 2                   |
| 209483_s_at  | -2.1  | 0.001739 | 0.811585 | NSL1          | NSL1, MIS12 kinetochore complex component                |
| 223848_at    | -6.01 | 0.001761 | 0.811585 | LOC100129198  | PRO2866                                                  |
| 1560517_s_at | -6.44 | 0.001782 | 0.811585 | LOC101928781  | uncharacterized LOC101928781                             |
| 242104_at    | -6.55 | 0.001828 | 0.811585 |               |                                                          |
| 1569172_a_at | -2.13 | 0.001866 | 0.811585 | LOC402160     | uncharacterized LOC402160                                |
| 1564287_at   | -4.55 | 0.001885 | 0.811585 | LINC00410     | long intergenic non-protein coding RNA 410               |
| 241935_at    | -2.01 | 0.001901 | 0.811585 | SHROOM1       | shroom family member 1                                   |
| 217343_at    | -9.85 | 0.001904 | 0.811585 | RP6-149D17.1  |                                                          |

|              |       |          |          |               |                                                                    |
|--------------|-------|----------|----------|---------------|--------------------------------------------------------------------|
| 1560895_at   | -4.53 | 0.001971 | 0.811585 | LOC645188     | uncharacterized LOC645188                                          |
| 230423_at    | -2.7  | 0.001985 | 0.811585 | FOXD3-AS1     | FOXD3 antisense RNA 1 (head to head)                               |
| 236063_at    | -3.12 | 0.001998 | 0.811585 |               |                                                                    |
| 205749_at    | -6.42 | 0.002001 | 0.811585 | CYP1A1        | cytochrome P450, family 1, subfamily A, polypeptide 1              |
| 224387_at    | 2.02  | 0.002037 | 0.811585 | COMMD5        | COMM domain containing 5                                           |
| 1553009_s_at | -2.15 | 0.002056 | 0.811585 | REXO1L1P      | REX1, RNA exonuclease 1 homolog (S. cerevisiae)-like 1, pseudogene |
| 1553041_at   | -4.17 | 0.002093 | 0.811585 | HTR3C         | 5-hydroxytryptamine (serotonin) receptor 3C, ionotropic            |
| 234607_at    | -2.68 | 0.00212  | 0.811585 | ARRDC1        | arrestin domain containing 1                                       |
| 1570267_at   | -2.11 | 0.002146 | 0.811585 | CTD-2534I21.8 |                                                                    |
| 236943_at    | -2.42 | 0.002147 | 0.811585 |               |                                                                    |
| 1570138_at   | -3.88 | 0.002152 | 0.811585 | LOC101926916  | uncharacterized LOC101926916                                       |
| 236519_at    | -3.98 | 0.002206 | 0.811585 | C9orf135      | chromosome 9 open reading frame 135                                |
| 1569426_at   | 5.97  | 0.002275 | 0.811585 | LOC100996342  | uncharacterized LOC100996342                                       |
| 1555509_a_at | -4.55 | 0.002313 | 0.811585 | SLC25A41      | solute carrier family 25, member 41                                |
| 235656_s_at  | -2.01 | 0.002322 | 0.811585 |               |                                                                    |
| 1563112_at   | -2.76 | 0.002336 | 0.811585 | BC039686      | Homo sapiens, clone IMAGE:5242075, mRNA.                           |

|             |        |          |          |              |                                                                                  |
|-------------|--------|----------|----------|--------------|----------------------------------------------------------------------------------|
| 219814_at   | -2.22  | 0.002343 | 0.811585 | MBNL3        | muscleblind-like splicing regulator 3                                            |
| 1564351_at  | -13.81 | 0.00237  | 0.811585 | RP11-52A20.2 |                                                                                  |
| 211903_s_at | -6.15  | 0.002378 | 0.811585 | MPL          | MPL proto-oncogene, thrombopoietin receptor                                      |
| 239488_at   | 13.74  | 0.002409 | 0.811585 | PPM1L        | protein phosphatase, Mg <sup>2+</sup> /Mn <sup>2+</sup> dependent, 1L            |
| 244281_at   | -3.32  | 0.002411 | 0.811585 | REXO1        | REX1, RNA exonuclease 1 homolog (S. cerevisiae)                                  |
| 1559568_at  | -2.28  | 0.002423 | 0.811585 |              |                                                                                  |
| 220598_at   | -2.19  | 0.002498 | 0.811585 | CARD14       | caspase recruitment domain family, member 14                                     |
| 214974_x_at | -3.38  | 0.00251  | 0.811585 | CXCL5        | chemokine (C-X-C motif) ligand 5                                                 |
| 1566694_at  | -17.15 | 0.002512 | 0.811585 |              |                                                                                  |
| 237769_at   | -5.86  | 0.002543 | 0.811585 |              |                                                                                  |
| 239934_x_at | -6     | 0.002549 | 0.811585 |              |                                                                                  |
| 1553064_at  | -2.24  | 0.002558 | 0.811585 | H1FOO        | H1 histone family, member O, oocyte-specific                                     |
| 216956_s_at | -2.94  | 0.002558 | 0.811585 | ITGA2B       | integrin, alpha 2b (platelet glycoprotein IIb of IIb/IIIa complex, antigen CD41) |
| 233188_at   | -2.03  | 0.002578 | 0.811585 | GALNT18      | polypeptide N-acetylgalactosaminyltransferase 18                                 |

|             |        |          |          |               |                                                                                     |
|-------------|--------|----------|----------|---------------|-------------------------------------------------------------------------------------|
| 241190_at   | -2.23  | 0.002582 | 0.811585 |               |                                                                                     |
| 208041_at   | -6.97  | 0.002589 | 0.811585 | GRK1          | G protein-coupled receptor kinase 1                                                 |
| 203399_x_at | -11.58 | 0.002594 | 0.811585 | PSG11; PSG3   | pregnancy specific beta-1-glycoprotein 11; pregnancy specific beta-1-glycoprotein 3 |
| 209775_x_at | -3.32  | 0.002663 | 0.811585 | SLC19A1       | solute carrier family 19 (folate transporter), member 1                             |
| 208428_at   | 2.89   | 0.002674 | 0.811585 | TAP2          | transporter 2, ATP-binding cassette, sub-family B (MDR/TAP)                         |
| 1562524_at  | -3.38  | 0.00273  | 0.811585 | LOC101929196  | uncharacterized LOC101929196                                                        |
| 1552596_at  | -5.4   | 0.002782 | 0.811585 | GAS2L2        | growth arrest-specific 2 like 2                                                     |
| 239221_at   | -6.73  | 0.002798 | 0.811585 | GPR123        | G protein-coupled receptor 123                                                      |
| 237328_at   | -3.94  | 0.002816 | 0.811585 | C14orf105     | chromosome 14 open reading frame 105                                                |
| 229963_at   | 2.02   | 0.002825 | 0.811585 | BEX5          | brain expressed, X-linked 5                                                         |
| 1553519_at  | -6.19  | 0.002852 | 0.811585 | LINC00314     | long intergenic non-protein coding RNA 314                                          |
| 227841_at   | 4.94   | 0.00293  | 0.811585 | AMDHD2; CEMP1 | amidohydrolase domain containing 2; cementum protein 1                              |
| 242694_at   | -6.93  | 0.002934 | 0.811585 | IQSEC3        | IQ motif and Sec7 domain 3                                                          |
| 208208_at   | -2.01  | 0.002984 | 0.811585 | MYH13         | myosin, heavy chain 13, skeletal muscle                                             |

|             |        |          |          |           |                                                                                  |
|-------------|--------|----------|----------|-----------|----------------------------------------------------------------------------------|
| 206237_s_at | 10.03  | 0.002993 | 0.811585 | NRG1      | neuregulin 1                                                                     |
| 232818_at   | -2.21  | 0.003014 | 0.811585 |           |                                                                                  |
| 238019_at   | -3.16  | 0.003052 | 0.811585 | PLIN5     | perilipin 5                                                                      |
| 1555513_at  | -14.83 | 0.003084 | 0.811585 | PIAS2     | protein inhibitor of activated STAT, 2                                           |
| 242105_at   | -2.92  | 0.003091 | 0.811585 | CCNE1     | cyclin E1                                                                        |
| 211242_x_at | -9.98  | 0.003105 | 0.811585 | KIR2DL4   | killer cell immunoglobulin-like receptor, two domains, long cytoplasmic tail, 4  |
| 239589_at   | 5.34   | 0.003112 | 0.811585 |           |                                                                                  |
| 240213_at   | -5     | 0.003148 | 0.811585 |           |                                                                                  |
| 1566622_at  | -2.85  | 0.00315  | 0.811585 |           |                                                                                  |
| 241134_at   | -2.56  | 0.003155 | 0.811585 |           |                                                                                  |
| 234451_at   | -6.03  | 0.003158 | 0.811585 | DKKL1P1   | dickkopf-like 1 pseudogene 1                                                     |
| 238062_at   | -2.46  | 0.003214 | 0.811585 | GPIHBP1   | glycosylphosphatidylinositol anchored high density lipoprotein binding protein 1 |
| 222773_s_at | 4.53   | 0.00322  | 0.811585 | GALNT12   | polypeptide N-acetylgalactosaminyltransferase 12                                 |
| 1558930_at  | -3.28  | 0.003225 | 0.811585 | LINC00460 | long intergenic non-protein coding RNA 460                                       |
| 207137_at   | -3.14  | 0.003232 | 0.811585 | TONSL     | tonsoku-like, DNA repair protein                                                 |
| 220678_at   | -2.42  | 0.003236 | 0.811585 | FLJ20712  | uncharacterized FLJ20712                                                         |

|              |       |          |          |              |                                                                   |
|--------------|-------|----------|----------|--------------|-------------------------------------------------------------------|
| 219224_x_at  | 2.59  | 0.003259 | 0.811585 | ZNF408       | zinc finger protein 408                                           |
| 241673_x_at  | 5.73  | 0.003279 | 0.811585 |              |                                                                   |
| 215687_x_at  | -2.18 | 0.003301 | 0.811585 | PLCB1        | phospholipase C, beta 1<br>(phosphoinositide-specific)            |
| 220848_x_at  | -2.45 | 0.003352 | 0.811585 | OBP2A        | odorant binding protein 2A                                        |
| 1563802_at   | -4.8  | 0.003426 | 0.811585 | LINC01226    | long intergenic non-protein coding RNA<br>1226                    |
| 1558177_at   | -6.94 | 0.003429 | 0.811585 | TMEM229B     | transmembrane protein 229B                                        |
| 1570065_at   | -2.67 | 0.003465 | 0.811585 | C22orf34     | chromosome 22 open reading frame 34                               |
| 234184_at    | -3.41 | 0.003545 | 0.811585 |              |                                                                   |
| 1560513_at   | -3.36 | 0.003629 | 0.811585 | LOC400568    | uncharacterized LOC400568                                         |
| 208429_x_at  | -3.13 | 0.003673 | 0.811585 | HNF4A        | hepatocyte nuclear factor 4, alpha                                |
| 1561391_at   | -3.46 | 0.003719 | 0.811585 | STAU2-AS1    | STAU2 antisense RNA 1                                             |
| 1565000_a_at | -2.39 | 0.003736 | 0.811585 | TCP11L2      | t-complex 11, testis-specific-like 2                              |
| 242948_x_at  | -9.38 | 0.003779 | 0.811585 |              |                                                                   |
| 1556413_a_at | -3.8  | 0.003842 | 0.811585 |              |                                                                   |
| 1561373_at   | -6.49 | 0.003856 | 0.811585 | PACRG-AS1    | PACRG antisense RNA 1                                             |
| 207368_at    | -4.96 | 0.003866 | 0.811585 | HTR1D        | 5-hydroxytryptamine (serotonin) receptor<br>1D, G protein-coupled |
| 1553564_at   | -2.05 | 0.003881 | 0.811585 | MACROD2      | MACRO domain containing 2                                         |
| 1561060_at   | -7.92 | 0.003945 | 0.811585 | LOC101929752 | uncharacterized LOC101929752                                      |

|              |        |          |          |               |                                                             |
|--------------|--------|----------|----------|---------------|-------------------------------------------------------------|
| 234332_at    | -2.02  | 0.003951 | 0.811585 | NUB1          | negative regulator of ubiquitin-like proteins 1             |
| 1558448_a_at | -2.07  | 0.003952 | 0.811585 | BC032415      | Homo sapiens cDNA FLJ35687 fis, clone SPLEN2019349.         |
| 238939_at    | -2.21  | 0.004015 | 0.811585 | ADD1          | adducin 1 (alpha)                                           |
| 210511_s_at  | 3.86   | 0.004016 | 0.811585 | INHBA         | inhibin, beta A                                             |
| 220930_s_at  | -10.41 | 0.004048 | 0.811585 | SMIM2         | small integral membrane protein 2                           |
| 237645_at    | -3.1   | 0.004051 | 0.811585 | RP11-413B19.2 |                                                             |
| 235778_s_at  | 5.84   | 0.004066 | 0.811585 | ANKRD44       | ankyrin repeat domain 44                                    |
| 237063_at    | -6.57  | 0.004126 | 0.811585 | RP11-44F14.8  |                                                             |
| 231622_at    | -8.04  | 0.004221 | 0.811585 | ASB17         | ankyrin repeat and SOCS box containing 17                   |
| 219187_at    | 2.88   | 0.004224 | 0.811585 | FKBPL         | FK506 binding protein like                                  |
| 240049_at    | -8.52  | 0.004292 | 0.811585 | RP13-39P12.3  |                                                             |
| 215967_s_at  | 5.49   | 0.004348 | 0.811585 | LY9           | lymphocyte antigen 9                                        |
| 244710_at    | -2.87  | 0.00435  | 0.811585 | LRGUK         | leucine-rich repeats and guanylate kinase domain containing |
| 1563013_at   | -4.71  | 0.00436  | 0.811585 | LOC646522     | uncharacterized LOC646522                                   |
| 234855_at    | -3.74  | 0.004403 | 0.811585 | ORF1          | uncharacterized protein, clone pT-Adv JuaX22                |
| 240814_at    | -4.84  | 0.004445 | 0.811585 | MGC39584      | uncharacterized LOC441058                                   |

|             |        |          |          |               |                                                  |
|-------------|--------|----------|----------|---------------|--------------------------------------------------|
| 1563127_at  | -15.62 | 0.004446 | 0.811585 | LINC01428     | long intergenic non-protein coding RNA 1428      |
| 215484_at   | -3.21  | 0.004464 | 0.811585 |               |                                                  |
| 235583_at   | -3.84  | 0.00447  | 0.811585 | ILDR1         | immunoglobulin-like domain containing receptor 1 |
| 205756_s_at | -2.32  | 0.004522 | 0.811585 | F8            | coagulation factor VIII, procoagulant component  |
| 1564379_at  | -4.07  | 0.004546 | 0.811585 |               |                                                  |
| 1560107_at  | -6.96  | 0.00457  | 0.811585 |               |                                                  |
| 232766_at   | -9.91  | 0.004591 | 0.811585 | BANF2         | barrier to autointegration factor 2              |
| 243148_at   | -3.02  | 0.004592 | 0.811585 |               |                                                  |
| 215585_at   | -2.17  | 0.004603 | 0.811585 |               |                                                  |
| 244649_at   | -6.1   | 0.004626 | 0.811585 | LOC646484     | uncharacterized LOC646484                        |
| 1560178_at  | -3     | 0.004628 | 0.811585 |               |                                                  |
| 219465_at   | -9.9   | 0.004643 | 0.811585 | APOA2         | apolipoprotein A-II                              |
| 227228_s_at | -2.02  | 0.004646 | 0.811585 | CCDC88C       | coiled-coil domain containing 88C                |
| 237273_at   | -9     | 0.004663 | 0.811585 | KCNU1         | potassium channel, subfamily U, member 1         |
| 1565740_at  | -8.7   | 0.004675 | 0.811585 |               |                                                  |
| 1566689_at  | -4.31  | 0.004723 | 0.811585 | RP11-157B13.7 |                                                  |
| 239156_at   | -2.92  | 0.004747 | 0.811585 |               |                                                  |
| 1553556_at  | -8.51  | 0.004765 | 0.811585 | TAS2R40       | taste receptor, type 2, member 40                |

|              |       |          |          |              |                                                            |
|--------------|-------|----------|----------|--------------|------------------------------------------------------------|
| 211276_at    | 3.43  | 0.004815 | 0.811585 | TCEAL2       | transcription elongation factor A (SII)-like 2             |
| 236137_at    | -8.3  | 0.004817 | 0.811585 |              |                                                            |
| 215106_at    | -2.5  | 0.004831 | 0.811585 | TTC22        | tetratricopeptide repeat domain 22                         |
| 1559235_a_at | -2.1  | 0.004844 | 0.811585 |              |                                                            |
| 229093_at    | -2.09 | 0.004949 | 0.811585 | NOS3         | nitric oxide synthase 3 (endothelial cell)                 |
| 215149_at    | -3.21 | 0.004964 | 0.811585 | AJAP1        | adherens junctions associated protein 1                    |
| 221106_at    | -2.62 | 0.004983 | 0.811585 | SLC22A17     | solute carrier family 22, member 17                        |
| 207028_at    | -2.58 | 0.00499  | 0.811585 | MYCNOS       | MYCN opposite strand                                       |
| 210562_at    | -2.19 | 0.005023 | 0.811585 | GREB1        | growth regulation by estrogen in breast cancer 1           |
| 1554923_at   | 2.55  | 0.005046 | 0.811585 | ANKS6        | ankyrin repeat and sterile alpha motif domain containing 6 |
| 229985_at    | -3.73 | 0.00519  | 0.811585 | BTNL9        | butyrophilin-like 9                                        |
| 238163_at    | 5.17  | 0.005191 | 0.811585 | LOC102725343 | uncharacterized LOC102725343                               |
| 220152_at    | -2.31 | 0.00521  | 0.811585 | C10orf95     | chromosome 10 open reading frame 95                        |
| 241162_at    | 4.59  | 0.005218 | 0.811585 |              |                                                            |
| 231589_at    | -5.32 | 0.005223 | 0.811585 | LOC101928917 | heat shock transcription factor, X-linked-like             |

|             |       |          |          |          |                                                           |
|-------------|-------|----------|----------|----------|-----------------------------------------------------------|
| 206817_x_at | -5.34 | 0.00523  | 0.811585 | CELF3    | CUGBP, Elav-like family member 3                          |
| 241121_at   | -5.74 | 0.005243 | 0.811585 |          |                                                           |
| 235485_at   | -4.7  | 0.005252 | 0.811585 | WDR44    | WD repeat domain 44                                       |
| 240465_at   | -4.84 | 0.005255 | 0.811585 | C4orf32  | chromosome 4 open reading frame 32                        |
| 1553062_at  | -2.56 | 0.00526  | 0.811585 | MOGAT1   | monoacylglycerol O-acyltransferase 1                      |
| 240998_at   | -3.9  | 0.005275 | 0.811585 |          |                                                           |
| 231701_s_at | -5.03 | 0.005332 | 0.811585 | SHMT1    | serine hydroxymethyltransferase 1<br>(soluble)            |
| 224141_at   | -3.38 | 0.005334 | 0.811585 | FLJ38668 | uncharacterized LOC644903                                 |
| 216687_x_at | -4.12 | 0.005345 | 0.811585 | UGT2B15  | UDP glucuronosyltransferase 2 family,<br>polypeptide B15  |
| 238226_at   | -6.39 | 0.005363 | 0.811585 | TMEM255B | transmembrane protein 255B                                |
| 240886_at   | -6.44 | 0.005374 | 0.811585 | CASR     | calcium-sensing receptor                                  |
| 217462_at   | -5.15 | 0.005381 | 0.811585 | MYRF     | myelin regulatory factor                                  |
| 207569_at   | -2.22 | 0.005447 | 0.811585 | ROS1     | ROS proto-oncogene 1 , receptor tyrosine<br>kinase        |
| 237940_s_at | -2.41 | 0.005456 | 0.811585 |          |                                                           |
| 206526_at   | -2.61 | 0.005478 | 0.811585 | RIBC2    | RIB43A domain with coiled-coils 2                         |
| 213192_at   | 2.03  | 0.005522 | 0.811585 | THAP3    | THAP domain containing, apoptosis<br>associated protein 3 |

|              |        |          |          |                 |                                                                           |
|--------------|--------|----------|----------|-----------------|---------------------------------------------------------------------------|
| 241216_at    | -2.38  | 0.005525 | 0.811585 |                 |                                                                           |
| 240347_at    | -3.29  | 0.00554  | 0.811585 |                 |                                                                           |
| 1565650_at   | -4.72  | 0.005569 | 0.811585 |                 |                                                                           |
| 1554491_a_at | -13.77 | 0.005609 | 0.811585 | SERPINC1        | serpin peptidase inhibitor, clade C (antithrombin), member 1              |
| 240363_at    | -2.04  | 0.005641 | 0.811585 | ANK1            | ankyrin 1, erythrocytic                                                   |
| 233908_x_at  | -2.33  | 0.005659 | 0.811585 |                 |                                                                           |
| 239994_at    | -5.11  | 0.00567  | 0.811585 | B3GALT5         | UDP-Gal:betaGlcNAc beta 1,3-galactosyltransferase, polypeptide 5          |
| 207745_at    | -2.51  | 0.005705 | 0.811585 | CABP2           | calcium binding protein 2                                                 |
| 229172_at    | -2.04  | 0.005708 | 0.811585 | HSPA12B         | heat shock 70kD protein 12B                                               |
| 216196_at    | -2.18  | 0.005708 | 0.811585 | HERC2P5; HERC2F | hect domain and RLD 2 pseudogene 5;<br>hect domain and RLD 2 pseudogene 8 |
| 239617_at    | -2.1   | 0.005746 | 0.811585 | GHRLOS          | ghrelin opposite strand/antisense RNA                                     |
| 1559926_at   | -2.82  | 0.005809 | 0.811585 | LOC728353       | uncharacterized LOC728353                                                 |
| 227147_s_at  | -2.99  | 0.00581  | 0.811585 | EGLN2           | egl-9 family hypoxia-inducible factor 2                                   |
| 1556405_s_at | -8.38  | 0.00585  | 0.811585 | LOC374890       | uncharacterized LOC374890                                                 |
| 243220_at    | -2.37  | 0.005899 | 0.811585 |                 |                                                                           |
| 221199_at    | -2.53  | 0.005921 | 0.811585 | GFRA4           | GDNF family receptor alpha 4                                              |
| 222949_at    | -2.69  | 0.006002 | 0.811585 | NXF3            | nuclear RNA export factor 3                                               |

|              |       |          |          |                  |                                                                                                         |
|--------------|-------|----------|----------|------------------|---------------------------------------------------------------------------------------------------------|
| 234667_at    | -2.12 | 0.006007 | 0.811585 |                  |                                                                                                         |
| 216462_at    | -8.22 | 0.006025 | 0.811585 |                  |                                                                                                         |
| 1563154_at   | -6.07 | 0.006045 | 0.811585 |                  |                                                                                                         |
| 1568635_at   | -6.63 | 0.006113 | 0.811585 | LINC00354        | long intergenic non-protein coding RNA 354                                                              |
| 1554714_at   | -2.01 | 0.006126 | 0.811585 | RELL1            | RELT-like 1                                                                                             |
| 237219_at    | -9.49 | 0.006128 | 0.811585 | LOC101928259     | uncharacterized LOC101928259                                                                            |
| 242340_at    | 3.56  | 0.006133 | 0.811585 | RP1-78O14.1      |                                                                                                         |
| 1559324_at   | -6.25 | 0.00615  | 0.811585 | BC019672; USP32P | Homo sapiens, clone IMAGE:4938453, mRNA.; ubiquitin specific peptidase 32 pseudogene 2                  |
| 231771_at    | -3.26 | 0.006208 | 0.811585 | GJB6             | gap junction protein, beta 6, 30kDa                                                                     |
| 234047_at    | -2.08 | 0.006209 | 0.811585 |                  |                                                                                                         |
| 215559_at    | 6.27  | 0.006219 | 0.811585 | ABCC6; LOC101930 | ATP-binding cassette, sub-family C (CFTR/MRP), member 6; multidrug resistance-associated protein 6-like |
| 1570116_at   | -7.95 | 0.00623  | 0.811585 | AC079807.4       |                                                                                                         |
| 227876_at    | -4.15 | 0.006236 | 0.811585 | ARHGAP39         | Rho GTPase activating protein 39                                                                        |
| 210226_at    | -5.61 | 0.00628  | 0.811585 | NR4A1            | nuclear receptor subfamily 4, group A, member 1                                                         |
| 1570181_a_at | -7.01 | 0.00632  | 0.811585 |                  |                                                                                                         |

|              |        |          |          |                  |                                                                                         |
|--------------|--------|----------|----------|------------------|-----------------------------------------------------------------------------------------|
| 237590_at    | -3.01  | 0.006323 | 0.811585 |                  |                                                                                         |
| 1553176_at   | -5.74  | 0.006371 | 0.811585 | SH2D1B           | SH2 domain containing 1B                                                                |
| 219472_at    | -2.14  | 0.006415 | 0.811585 | CENPO            | centromere protein O                                                                    |
| 242179_s_at  | -2.32  | 0.006416 | 0.811585 | TSPAN16          | tetraspanin 16                                                                          |
| 241507_x_at  | -4.6   | 0.006431 | 0.811585 |                  |                                                                                         |
| 208202_s_at  | 5.71   | 0.00644  | 0.811585 | JADE2            | jade family PHD finger 2                                                                |
| 1553654_at   | -2.35  | 0.006453 | 0.811585 | SYT14            | synaptotagmin XIV                                                                       |
| 234085_at    | -10.56 | 0.006456 | 0.811585 | CCDC169          | coiled-coil domain containing 169                                                       |
| 222560_at    | -4.11  | 0.006553 | 0.811585 | LANCL2           | LanC lantibiotic synthetase component C-like 2 (bacterial)                              |
| 1561407_at   | -11    | 0.006576 | 0.811585 | ARAP2; LOC101928 | ArfGAP with RhoGAP domain, ankyrin repeat and PH domain 2; uncharacterized LOC101928667 |
| 1567100_at   | -4.65  | 0.006586 | 0.811585 |                  |                                                                                         |
| 220895_at    | -4.14  | 0.006588 | 0.811585 | USP29            | ubiquitin specific peptidase 29                                                         |
| 231537_at    | -2.28  | 0.006599 | 0.811585 |                  |                                                                                         |
| 1561039_a_at | 5.55   | 0.00661  | 0.811585 | ZNF81            | zinc finger protein 81                                                                  |
| 205493_s_at  | -6.4   | 0.006673 | 0.811585 | DPYSL4           | dihydropyrimidinase-like 4                                                              |
| 242185_at    | -4.33  | 0.006687 | 0.811585 | AC025442.3       |                                                                                         |
| 1552526_at   | 2.58   | 0.006703 | 0.811585 | FAM71C           | family with sequence similarity 71, member C                                            |
| 232314_at    | -4.27  | 0.006714 | 0.811585 | MTFR1            | mitochondrial fission regulator 1                                                       |
| 1556778_at   | -11.04 | 0.006718 | 0.811585 |                  |                                                                                         |

|              |        |          |          |                 |                                                                                                                                                 |
|--------------|--------|----------|----------|-----------------|-------------------------------------------------------------------------------------------------------------------------------------------------|
| 1565325_at   | -4.86  | 0.006759 | 0.811585 | MATR3; SNHG4    | matrin 3; small nucleolar RNA host gene 4 (non-protein coding)                                                                                  |
| 1559036_at   | -6.28  | 0.006797 | 0.811585 | C4A; C4B; C4B_2 | complement component 4A (Rodgers blood group); complement component 4B (Chido blood group); complement component 4B (Chido blood group), copy 2 |
| 1569782_at   | -2.52  | 0.006811 | 0.811585 | LOC101929116    | uncharacterized LOC101929116                                                                                                                    |
| 1569712_at   | -8.28  | 0.006816 | 0.811585 | LOC101928052    | uncharacterized LOC101928052                                                                                                                    |
| 1557338_x_at | -2.19  | 0.006824 | 0.811585 | SUCLG2-AS1      | SUCLG2 antisense RNA 1 (head to head)                                                                                                           |
| 202977_s_at  | 5.64   | 0.006854 | 0.811585 | CREBZF          | CREB/ATF bZIP transcription factor                                                                                                              |
| 241791_at    | -2.01  | 0.006862 | 0.811585 | TTN             | titin                                                                                                                                           |
| 244686_at    | -2.85  | 0.006872 | 0.811585 | TCOF1           | Treacher Collins-Franceschetti syndrome 1                                                                                                       |
| 219912_s_at  | -8.71  | 0.006905 | 0.811585 |                 |                                                                                                                                                 |
| 237683_s_at  | -3.81  | 0.006932 | 0.811585 |                 |                                                                                                                                                 |
| 243965_at    | -2.15  | 0.00694  | 0.811585 |                 |                                                                                                                                                 |
| 206626_x_at  | -2.62  | 0.006982 | 0.811585 | SSX1            | synovial sarcoma, X breakpoint 1                                                                                                                |
| 231680_at    | -10.64 | 0.007009 | 0.811585 |                 |                                                                                                                                                 |
| 1568615_a_at | -2.18  | 0.007011 | 0.811585 | SRD5A3-AS1      | SRD5A3 antisense RNA 1                                                                                                                          |
| 228956_at    | -2.77  | 0.007012 | 0.811585 | UGT8            | UDP glycosyltransferase 8                                                                                                                       |

|             |        |          |          |                  |                                                                          |
|-------------|--------|----------|----------|------------------|--------------------------------------------------------------------------|
| 1553822_at  | -6.09  | 0.00702  | 0.811585 | RTP1             | receptor (chemosensory) transporter protein 1                            |
| 211201_at   | -2.01  | 0.007038 | 0.811585 | FSHR             | follicle stimulating hormone receptor                                    |
| 207927_at   | -9.68  | 0.007047 | 0.811585 | HTR7             | 5-hydroxytryptamine (serotonin) receptor 7, adenylate cyclase-coupled    |
| 1554871_at  | -5.39  | 0.007057 | 0.811585 |                  |                                                                          |
| 240541_at   | -13.87 | 0.007066 | 0.811585 |                  |                                                                          |
| 228868_x_at | -3.36  | 0.00713  | 0.811585 | CDT1             | chromatin licensing and DNA replication factor 1                         |
| 213870_at   | 3.04   | 0.007145 | 0.811585 | COL11A2          | collagen, type XI, alpha 2                                               |
| 242543_at   | -2.04  | 0.00715  | 0.811585 | LOC101928082; SH | uncharacterized LOC101928082; SH2 domain containing 6                    |
| 224087_at   | -2.18  | 0.007178 | 0.811585 |                  |                                                                          |
| 231524_at   | -6.29  | 0.007203 | 0.811585 | KCNAB1           | potassium voltage-gated channel, shaker-related subfamily, beta member 1 |
| 234510_at   | -4.49  | 0.007224 | 0.811585 |                  |                                                                          |
| 214284_s_at | -2.54  | 0.007265 | 0.811585 | FGF18            | fibroblast growth factor 18                                              |
| 231309_at   | -6.36  | 0.007275 | 0.811585 |                  |                                                                          |
| 1566165_at  | -2.62  | 0.007323 | 0.811585 |                  |                                                                          |
| 1557352_at  | 2.06   | 0.007339 | 0.811585 | SQLE             | squalene epoxidase                                                       |
| 1557593_at  | -2.19  | 0.00738  | 0.811585 | WDR3             | WD repeat domain 3                                                       |

|             |       |          |          |                            |                                                                                |
|-------------|-------|----------|----------|----------------------------|--------------------------------------------------------------------------------|
| 234379_at   | -4.61 | 0.007462 | 0.811585 | FLT4                       | fms-related tyrosine kinase 4                                                  |
| 214452_at   | 2.97  | 0.007468 | 0.811585 | BCAT1                      | branched chain amino-acid transaminase 1, cytosolic                            |
| 243107_at   | -5.91 | 0.007518 | 0.811585 |                            |                                                                                |
| 215337_at   | -2.94 | 0.007554 | 0.811585 | MED24                      | mediator complex subunit 24                                                    |
| 236770_at   | 3.24  | 0.00756  | 0.811585 | TPTE2P5                    | transmembrane phosphoinositide 3-phosphatase and tensin homolog 2 pseudogene 5 |
| 219850_s_at | -4.29 | 0.007569 | 0.811585 | EHF                        | ets homologous factor                                                          |
| 1570430_at  | -5.14 | 0.007569 | 0.811585 |                            |                                                                                |
| 244244_at   | -2.07 | 0.007582 | 0.811585 | CD300LG                    | CD300 molecule-like family member g                                            |
| 243674_at   | -6.13 | 0.007628 | 0.811585 | LOC102723678; LOC102723709 | uncharacterized LOC102723678; uncharacterized LOC102723709                     |
| 215782_at   | 4.97  | 0.007645 | 0.811585 | RAB40AL                    | RAB40A, member RAS oncogene family-like                                        |
| 207459_x_at | 3.93  | 0.007726 | 0.811585 | GYPB                       | glycophorin B (MNS blood group)                                                |
| 1557790_at  | -3.23 | 0.007777 | 0.811585 | JRKL                       | JRK-like                                                                       |
| 243873_at   | -2.43 | 0.007777 | 0.811585 | LOC101929459               | uncharacterized LOC101929459                                                   |
| 215531_s_at | -5.48 | 0.007842 | 0.811585 | GABRA5                     | gamma-aminobutyric acid (GABA) A receptor, alpha 5                             |
| 1566734_at  | -2.23 | 0.007857 | 0.811585 | LOC283454                  | uncharacterized LOC283454                                                      |
| 240657_at   | -6.37 | 0.00791  | 0.811585 |                            |                                                                                |

|             |        |          |          |           |                                                                             |
|-------------|--------|----------|----------|-----------|-----------------------------------------------------------------------------|
| 217121_at   | -4.1   | 0.007926 | 0.811585 | TNKS      | tankyrase, TRF1-interacting ankyrin-related ADP-ribose polymerase           |
| 207952_at   | -2.01  | 0.007932 | 0.811585 | IL5       | interleukin 5                                                               |
| 1553239_at  | 2.06   | 0.007971 | 0.811585 | FAM124A   | family with sequence similarity 124A                                        |
| 1561310_at  | -2.23  | 0.00802  | 0.811585 |           |                                                                             |
| 203976_s_at | 3.12   | 0.008065 | 0.811585 | CHAF1A    | chromatin assembly factor 1, subunit A (p150)                               |
| 221732_at   | 2.01   | 0.008105 | 0.811585 | CANT1     | calcium activated nucleotidase 1                                            |
| 243246_at   | -2.61  | 0.008149 | 0.811585 |           |                                                                             |
| 1563026_at  | -8.05  | 0.008155 | 0.811585 |           |                                                                             |
| 210992_x_at | 4.03   | 0.008215 | 0.811585 | FCGR2C    | Fc fragment of IgG, low affinity IIc, receptor for (CD32) (gene/pseudogene) |
| 224310_s_at | -5.72  | 0.008255 | 0.811585 | BCL11B    | B-cell CLL/lymphoma 11B (zinc finger protein)                               |
| 234847_at   | -8.31  | 0.008267 | 0.811585 | LINC00309 | long intergenic non-protein coding RNA 309                                  |
| 1565673_at  | -14.64 | 0.008318 | 0.811585 | FCGR2A    | Fc fragment of IgG, low affinity IIa, receptor (CD32)                       |
| 240243_at   | -2.5   | 0.008327 | 0.811585 |           |                                                                             |
| 203784_s_at | 6.26   | 0.008344 | 0.811585 | DDX28     | DEAD (Asp-Glu-Ala-Asp) box polypeptide 28                                   |

|              |        |          |          |                 |                                                                                                              |
|--------------|--------|----------|----------|-----------------|--------------------------------------------------------------------------------------------------------------|
| 244099_at    | -7.54  | 0.008346 | 0.811585 | CACNG2          | calcium channel, voltage-dependent, gamma subunit 2                                                          |
| 1560753_at   | -2.12  | 0.008351 | 0.811585 | RP11-215E13.2   |                                                                                                              |
| 223762_at    | 2.27   | 0.008351 | 0.811585 | TMOD4; VPS72    | tropomodulin 4 (muscle); vacuolar protein sorting 72 homolog (S. cerevisiae)                                 |
| 234927_s_at  | -2.39  | 0.008369 | 0.811585 | MAGIX           | MAGI family member, X-linked                                                                                 |
| 208162_s_at  | -2.62  | 0.008384 | 0.811585 |                 |                                                                                                              |
| 229971_at    | -3.41  | 0.008404 | 0.811585 | GPR114          | G protein-coupled receptor 114                                                                               |
| 241310_at    | -2.33  | 0.008408 | 0.811585 | NEK5            | NIMA-related kinase 5                                                                                        |
| 234368_at    | -3.89  | 0.008412 | 0.811585 | RP5-1189K21.2   |                                                                                                              |
| 216052_x_at  | -3.35  | 0.008481 | 0.811585 | ARTN            | artemin                                                                                                      |
| 239428_at    | -4.6   | 0.008492 | 0.811585 |                 |                                                                                                              |
| 238704_at    | 2.89   | 0.008506 | 0.811585 | RP11-498C9.15   |                                                                                                              |
| 235361_at    | -2.22  | 0.00861  | 0.811585 | STAMPB          | STAM binding protein                                                                                         |
| 215110_at    | -2.89  | 0.008622 | 0.811585 | LOC100288974; M | BMS1 homolog, ribosome assembly protein (yeast) pseudogene; mannose-binding lectin (protein A) 1, pseudogene |
| 216228_s_at  | -2.37  | 0.008637 | 0.811585 | WDHD1           | WD repeat and HMG-box DNA binding protein 1                                                                  |
| 1553652_a_at | -14.58 | 0.008682 | 0.811585 | C18orf54        | chromosome 18 open reading frame 54                                                                          |
| 1555257_a_at | -7.71  | 0.008684 | 0.811585 | MYO3B           | myosin IIIB                                                                                                  |

|              |       |          |          |                |                                                                  |
|--------------|-------|----------|----------|----------------|------------------------------------------------------------------|
| 1558120_at   | -2.29 | 0.008732 | 0.811585 | DDX3X          | DEAD (Asp-Glu-Ala-Asp) box helicase 3, X-linked                  |
| 220106_at    | -3.99 | 0.00875  | 0.811585 | NPC1L1         | NPC1-like 1                                                      |
| 1559996_s_at | -2.63 | 0.008757 | 0.811585 | SAMD14         | sterile alpha motif domain containing 14                         |
| 1562970_at   | -4.09 | 0.008809 | 0.811585 |                |                                                                  |
| 244880_at    | -3.68 | 0.008813 | 0.811585 | RP11-1260E13.2 |                                                                  |
| 239495_at    | -2.66 | 0.008821 | 0.811585 |                |                                                                  |
| 236272_at    | -3.13 | 0.008842 | 0.811585 | UNC119B        | unc-119 homolog B (C. elegans)                                   |
| 1570115_at   | -2.76 | 0.0089   | 0.811585 | PP12708        | uncharacterized LOC100130609                                     |
| 214417_s_at  | -2.37 | 0.00895  | 0.811585 |                |                                                                  |
| 228344_s_at  | -5.49 | 0.009131 | 0.811585 | TBX3           | T-box 3                                                          |
| 227903_x_at  | 2.19  | 0.009134 | 0.811585 | TPGS1          | tubulin polyglutamylase complex subunit 1                        |
| 1555788_a_at | -8.49 | 0.009145 | 0.811585 | TRIB3          | tribbles pseudokinase 3                                          |
| 231938_at    | -2.45 | 0.009151 | 0.811585 | SGOL1          | shugoshin-like 1 (S. pombe)                                      |
| 211030_s_at  | -2.72 | 0.009164 | 0.811585 | SLC6A6         | solute carrier family 6 (neurotransmitter transporter), member 6 |
| 216324_at    | -2.46 | 0.009179 | 0.811585 |                |                                                                  |
| 1552509_a_at | -3.2  | 0.009207 | 0.811585 | CD300LG        | CD300 molecule-like family member g                              |
| 1557866_at   | 3.92  | 0.009208 | 0.811585 | C9orf117       | chromosome 9 open reading frame 117                              |

|              |       |          |          |                            |                                                                                                 |
|--------------|-------|----------|----------|----------------------------|-------------------------------------------------------------------------------------------------|
| 1563223_a_at | -4.43 | 0.009214 | 0.811585 | CENPI                      | centromere protein I                                                                            |
| 1564138_at   | -3.22 | 0.00927  | 0.811585 | FBXW12                     | F-box and WD repeat domain containing 12                                                        |
| 230971_x_at  | -3.66 | 0.009337 | 0.811585 | GLTPD2                     | glycolipid transfer protein domain containing 2                                                 |
| 206850_at    | -2.82 | 0.009345 | 0.811585 | RASL10A                    | RAS-like, family 10, member A                                                                   |
| 1561789_at   | -2.51 | 0.009475 | 0.811585 |                            |                                                                                                 |
| 1552541_at   | -2.66 | 0.009484 | 0.811585 | TAGAP                      | T-cell activation RhoGTPase activating protein                                                  |
| 1569738_at   | -3.92 | 0.009513 | 0.811585 | LOC101929631               | uncharacterized LOC101929631                                                                    |
| 206641_at    | 5.61  | 0.009571 | 0.811585 | TNFRSF17                   | tumor necrosis factor receptor superfamily, member 17                                           |
| 240016_at    | -2.6  | 0.009626 | 0.811585 |                            |                                                                                                 |
| 205182_s_at  | 2.96  | 0.009629 | 0.811585 | ZNF324                     | zinc finger protein 324                                                                         |
| 1564933_at   | -8.56 | 0.009638 | 0.811585 |                            |                                                                                                 |
| 216728_at    | -4.26 | 0.009655 | 0.811585 |                            |                                                                                                 |
| 210805_x_at  | -3.53 | 0.009655 | 0.811585 | LOC100506403; LOC101928269 | uncharacterized LOC100506403; uncharacterized LOC101928269; runt-related transcription factor 1 |
| 236489_at    | -2.51 | 0.009657 | 0.811585 | GPR110                     | G protein-coupled receptor 110                                                                  |
| 1561431_at   | -2.14 | 0.009672 | 0.811585 | RP11-284F21.8              |                                                                                                 |
| 1563106_at   | -2.54 | 0.009685 | 0.811585 |                            |                                                                                                 |
| 208013_s_at  | -5.64 | 0.009704 | 0.811585 | ACRV1                      | acrosomal vesicle protein 1                                                                     |
| 240582_x_at  | -6.73 | 0.009715 | 0.811585 |                            |                                                                                                 |

|              |        |          |          |                  |                                                                                                                                 |
|--------------|--------|----------|----------|------------------|---------------------------------------------------------------------------------------------------------------------------------|
| 244056_at    | -2.55  | 0.009718 | 0.811585 | SFTA2            | surfactant associated 2                                                                                                         |
| 215834_x_at  | -2.96  | 0.009728 | 0.811585 | SCARB1           | scavenger receptor class B, member 1                                                                                            |
| 1570359_at   | -2.07  | 0.009761 | 0.811585 | DDX3Y            | DEAD (Asp-Glu-Ala-Asp) box helicase 3, Y-linked                                                                                 |
| 1569756_at   | -15.14 | 0.009796 | 0.811585 | LOC101927292     | uncharacterized LOC101927292                                                                                                    |
| 217290_at    | -2.08  | 0.009816 | 0.811585 | RP5-1170D6.1     |                                                                                                                                 |
| 202949_s_at  | -2.36  | 0.009836 | 0.811585 | FHL2             | four and a half LIM domains 2                                                                                                   |
| 1555546_a_at | -3.41  | 0.009906 | 0.811585 | POFUT2           | protein O-fucosyltransferase 2                                                                                                  |
| 219450_at    | -2.23  | 0.009984 | 0.811585 | C4orf19          | chromosome 4 open reading frame 19                                                                                              |
| 243536_x_at  | -2.31  | 0.010021 | 0.811585 | ARHGAP27         | Rho GTPase activating protein 27                                                                                                |
| 216706_x_at  | -2.17  | 0.010092 | 0.811585 | IGHD3-16; IGHG1; | immunoglobulin heavy diversity 3-16; immunoglobulin heavy constant gamma 1 (G1m marker); src kinase associated phosphoprotein 2 |
| 206997_s_at  | -4.98  | 0.010134 | 0.811585 | HS6ST1           | heparan sulfate 6-O-sulfotransferase 1                                                                                          |
| 231598_x_at  | -5.86  | 0.010156 | 0.811585 |                  |                                                                                                                                 |
| 243146_at    | -15.98 | 0.010167 | 0.811585 |                  |                                                                                                                                 |
| 223291_at    | -2.26  | 0.010171 | 0.811585 | MRPS15           | mitochondrial ribosomal protein S15                                                                                             |

|              |       |          |          |                |                                                                                             |
|--------------|-------|----------|----------|----------------|---------------------------------------------------------------------------------------------|
| 242328_at    | -3.8  | 0.010217 | 0.811585 | RAB3C          | RAB3C, member RAS oncogene family                                                           |
| 1556884_a_at | -8.9  | 0.010244 | 0.811585 | LINC00558      | long intergenic non-protein coding RNA 558                                                  |
| 222328_x_at  | 3.4   | 0.010246 | 0.811585 |                |                                                                                             |
| 1570234_at   | -8.58 | 0.010259 | 0.811585 | LOC101928559   | uncharacterized LOC101928559                                                                |
| 239931_at    | -4.14 | 0.010325 | 0.811585 |                |                                                                                             |
| 215350_at    | -2.35 | 0.010345 | 0.811585 | SYNE1          | spectrin repeat containing, nuclear envelope 1                                              |
| 1566786_at   | -5.43 | 0.01038  | 0.811585 |                |                                                                                             |
| 217392_at    | -2.36 | 0.010414 | 0.811585 | RP3-452M16.1   |                                                                                             |
| 237852_at    | -2.73 | 0.010472 | 0.811585 |                |                                                                                             |
| 1562828_at   | -2.31 | 0.010485 | 0.811585 |                |                                                                                             |
| 239270_at    | -2.06 | 0.010489 | 0.811585 | PLCXD3         | phosphatidylinositol-specific phospholipase C, X domain containing 3                        |
| 232539_at    | -5.1  | 0.01049  | 0.811585 | SOCS2          | suppressor of cytokine signaling 2                                                          |
| 1553574_at   | -3.58 | 0.010491 | 0.811585 | IFNE           | interferon, epsilon                                                                         |
| 230520_at    | -2.41 | 0.010521 | 0.811585 | AIG1           | androgen-induced 1                                                                          |
| 1563341_at   | 3.9   | 0.01058  | 0.811585 | LOC101927783   | uncharacterized LOC101927783                                                                |
| 220129_at    | -4.74 | 0.01061  | 0.811585 | CCDC169-SOHLH2 | CCDC169-SOHLH2 readthrough; spermatogenesis and oogenesis specific basic helix-loop-helix 2 |
| 224251_at    | -3.63 | 0.010615 | 0.811585 | WDR96          | WD repeat domain 96                                                                         |

|             |        |          |          |                  |                                                                                                   |
|-------------|--------|----------|----------|------------------|---------------------------------------------------------------------------------------------------|
| 222305_at   | -2.98  | 0.010617 | 0.811585 | HK2; RP11-259N19 | hexokinase 2                                                                                      |
| 239094_at   | -2.31  | 0.010623 | 0.811585 | LOC730961        | uncharacterized LOC730961                                                                         |
| 237978_at   | -10.65 | 0.010664 | 0.811585 |                  |                                                                                                   |
| 217000_at   | -6.58  | 0.01068  | 0.811585 | KRT18P50         | keratin 18 pseudogene 50                                                                          |
| 217488_x_at | -2.42  | 0.010702 | 0.811585 | PMS2P3           | postmeiotic segregation increased 2<br>pseudogene 3                                               |
| 244318_at   | -2.83  | 0.010748 | 0.811585 |                  |                                                                                                   |
| 1565799_at  | -5.37  | 0.010759 | 0.811585 | RAB3IP           | RAB3A interacting protein                                                                         |
| 210577_at   | -5.4   | 0.010794 | 0.811585 | CASR             | calcium-sensing receptor                                                                          |
| 228205_at   | -2.35  | 0.010846 | 0.811585 | TKT              | transketolase                                                                                     |
| 234236_at   | -2.15  | 0.010909 | 0.811585 | AMBRA1           | autophagy/beclin-1 regulator 1                                                                    |
| 208295_x_at | -7.59  | 0.010911 | 0.811585 | CSHL1            | chorionic somatomammotropin hormone-<br>like 1                                                    |
| 244785_at   | -14.26 | 0.010913 | 0.811585 | CTD-2118P12.1    | uncharacterized LOC101929660                                                                      |
| 217678_at   | 3.69   | 0.010966 | 0.811585 | SLC7A11          | solute carrier family 7 (anionic amino<br>acid transporter light chain, xc- system),<br>member 11 |
| 205722_s_at | 2.32   | 0.010982 | 0.811585 | GFRA2            | GDNF family receptor alpha 2                                                                      |
| 207244_x_at | -3.88  | 0.010996 | 0.811585 | CYP2A6           | cytochrome P450, family 2, subfamily A,<br>polypeptide 6                                          |
| 207591_s_at | -2.64  | 0.011067 | 0.811585 | ARID1A           | AT rich interactive domain 1A (SWI-like)                                                          |
| 230420_at   | -3.99  | 0.011085 | 0.811585 | CASZ1            | castor zinc finger 1                                                                              |

|              |       |          |          |                  |                                                                                                        |
|--------------|-------|----------|----------|------------------|--------------------------------------------------------------------------------------------------------|
| 216351_x_at  | -6.75 | 0.011136 | 0.811585 | DAZ1; DAZ2; DAZ3 | deleted in azoospermia 1; deleted in azoospermia 2; deleted in azoospermia 3; deleted in azoospermia 4 |
| 229108_at    | -2.42 | 0.011142 | 0.811585 |                  |                                                                                                        |
| 229195_at    | -2.32 | 0.01117  | 0.811585 | MESP1            | mesoderm posterior basic helix-loop-helix transcription factor 1                                       |
| 220366_at    | -2.4  | 0.0112   | 0.811585 | ELSPBP1          | epididymal sperm binding protein 1                                                                     |
| 1569796_s_at | -8.56 | 0.011249 | 0.811585 | ATRNL1           | attractin-like 1                                                                                       |
| 215041_s_at  | -2.68 | 0.011257 | 0.811585 | DOCK9            | dedicator of cytokinesis 9                                                                             |
| 237665_at    | -2.59 | 0.011265 | 0.811585 |                  |                                                                                                        |
| 1552724_at   | -2.19 | 0.011308 | 0.811585 | RHOXF1           | Rhox homeobox family, member 1                                                                         |
| 1560728_at   | -2.05 | 0.011315 | 0.811585 |                  |                                                                                                        |
| 229730_at    | 7.09  | 0.011334 | 0.811585 | SMTNL2           | smoothelin-like 2                                                                                      |
| 1557359_at   | -3.41 | 0.011359 | 0.811585 | LINC01268        | long intergenic non-protein coding RNA 1268                                                            |
| 1569861_at   | -5.5  | 0.011371 | 0.811585 | TRAF5            | TNF receptor-associated factor 5                                                                       |
| 213363_at    | -4.14 | 0.011381 | 0.811585 | CA5BP1           | carbonic anhydrase VB pseudogene 1                                                                     |
| 217228_s_at  | -2.46 | 0.0114   | 0.811585 | ASB4             | ankyrin repeat and SOCS box containing 4                                                               |
| 1569963_at   | -2.67 | 0.011421 | 0.811585 | LOC101928525     | uncharacterized LOC101928525                                                                           |

|             |        |          |          |                   |                                                                  |
|-------------|--------|----------|----------|-------------------|------------------------------------------------------------------|
| 1553935_at  | -3.95  | 0.011443 | 0.811585 | BFSP2-AS1         | BFSP2 antisense RNA 1                                            |
| 240163_at   | -3.84  | 0.011451 | 0.811585 | LOC101928784      | uncharacterized LOC101928784                                     |
| 239139_at   | -2.41  | 0.011459 | 0.811585 | CPNE9             | copine family member IX                                          |
| 217273_at   | -3.75  | 0.01146  | 0.811585 | PRAMEF10          | PRAME family member 10                                           |
| 233342_at   | -2.04  | 0.01146  | 0.811585 | LOC100134040      | uncharacterized LOC100134040                                     |
| 214611_at   | -3.17  | 0.011541 | 0.811585 | GRIK1             | glutamate receptor, ionotropic, kainate 1                        |
| 203027_s_at | -2.71  | 0.011544 | 0.811585 | MVD               | mevalonate (diphospho) decarboxylase                             |
| 207420_at   | -2.8   | 0.01159  | 0.811585 | COLEC10           | collectin sub-family member 10 (C-type lectin)                   |
| 1557569_at  | -4.73  | 0.011619 | 0.811585 | MPDU1             | mannose-P-dolichol utilization defect 1                          |
| 1562499_at  | -3.1   | 0.01163  | 0.811585 |                   |                                                                  |
| 230157_at   | -4.25  | 0.011639 | 0.811585 | CDH24             | cadherin 24, type 2                                              |
| 230555_s_at | -7.37  | 0.011674 | 0.811585 | MED30             | mediator complex subunit 30                                      |
| 1562051_at  | -2.01  | 0.011714 | 0.811585 | LOC729296; MIR646 | uncharacterized LOC729296; MIR646 host gene (non-protein coding) |
| 1564003_at  | -11.31 | 0.011715 | 0.811585 |                   |                                                                  |
| 242855_at   | -2.77  | 0.011743 | 0.811585 | KCP               | kielin/chordin-like protein                                      |
| 1554165_at  | -9.71  | 0.011808 | 0.811585 | FAM53B            | family with sequence similarity 53, member B                     |
| 208554_at   | 3.79   | 0.011823 | 0.811585 | POU4F3            | POU class 4 homeobox 3                                           |

|             |       |          |          |            |                                                                                  |
|-------------|-------|----------|----------|------------|----------------------------------------------------------------------------------|
| 232664_at   | 3.94  | 0.011827 | 0.811585 | LINC00954  | long intergenic non-protein coding RNA 954                                       |
| 1552853_at  | -3.46 | 0.01183  | 0.811585 | VWA5B1     | von Willebrand factor A domain containing 5B1                                    |
| 1564300_at  | -3.78 | 0.01183  | 0.811585 | IQCF5-AS1  | IQCF5 antisense RNA 1                                                            |
| 241570_at   | -2.21 | 0.011844 | 0.811585 |            |                                                                                  |
| 240764_at   | -4.46 | 0.011864 | 0.811585 |            |                                                                                  |
| 1562740_at  | -5.97 | 0.011896 | 0.811585 | DNAJB8-AS1 | DNAJB8 antisense RNA 1                                                           |
| 234794_at   | -8.09 | 0.011917 | 0.811585 |            |                                                                                  |
| 237931_at   | -2.48 | 0.011918 | 0.811585 |            |                                                                                  |
| 236759_at   | -2.09 | 0.011945 | 0.811585 |            |                                                                                  |
| 205385_at   | -5.85 | 0.011982 | 0.811585 | MDM2       | MDM2 proto-oncogene, E3 ubiquitin protein ligase                                 |
| 211410_x_at | -2.09 | 0.012002 | 0.811585 | KIR2DL5A   | killer cell immunoglobulin-like receptor, two domains, long cytoplasmic tail, 5A |
| 216275_at   | -6.46 | 0.012054 | 0.811585 | BUB1       | BUB1 mitotic checkpoint serine/threonine kinase                                  |
| 221180_at   | -2.62 | 0.012091 | 0.811585 | MAP3K19    | mitogen-activated protein kinase kinase kinase 19                                |
| 216201_at   | -4.08 | 0.012101 | 0.811585 |            |                                                                                  |
| 233708_at   | -2.73 | 0.012152 | 0.811585 |            |                                                                                  |
| 204818_at   | -6.21 | 0.012189 | 0.811585 | HSD17B2    | hydroxysteroid (17-beta) dehydrogenase 2                                         |

|              |        |          |          |              |                                                             |
|--------------|--------|----------|----------|--------------|-------------------------------------------------------------|
| 232756_at    | -2.57  | 0.012219 | 0.811585 | KALRN        | kalirin, RhoGEF kinase                                      |
| 243190_at    | -13.25 | 0.012283 | 0.811585 | AC087501.1   |                                                             |
| 234688_x_at  | -3.19  | 0.012289 | 0.811585 | CNTROB       | centrobin, centrosomal BRCA2 interacting protein            |
| 240804_at    | -5.18  | 0.012313 | 0.811585 |              |                                                             |
| 231194_at    | -5.24  | 0.012332 | 0.811585 | SNX32        | sorting nexin 32                                            |
| 234642_at    | -3.04  | 0.012368 | 0.811585 |              |                                                             |
| 1559180_at   | 6.16   | 0.012416 | 0.811585 | LOC100131860 | uncharacterized LOC100131860                                |
| 1561572_at   | -2.95  | 0.012468 | 0.811585 | LOC101929284 | uncharacterized LOC101929284                                |
| 220920_at    | -4.81  | 0.012471 | 0.811585 | ATP10B       | ATPase, class V, type 10B                                   |
| 1560971_a_at | -2.82  | 0.012491 | 0.811585 |              |                                                             |
| 210280_at    | -2.1   | 0.012542 | 0.811585 | MPZ          | myelin protein zero                                         |
| 1568636_a_at | 3.49   | 0.012582 | 0.811585 | LINC00354    | long intergenic non-protein coding RNA 354                  |
| 228103_s_at  | -2.44  | 0.012594 | 0.811585 | AC007362.3   |                                                             |
| 238498_at    | -3.42  | 0.012629 | 0.811585 | RP3-406A7.7  |                                                             |
| 1555612_s_at | -3.33  | 0.012652 | 0.811585 | G6PC         | glucose-6-phosphatase, catalytic subunit                    |
| 239309_at    | -3.08  | 0.012654 | 0.811585 | DLX6         | distal-less homeobox 6                                      |
| 226937_at    | -4.52  | 0.012725 | 0.811585 | CRLS1        | cardiolipin synthase 1                                      |
| 232208_at    | -2.2   | 0.012746 | 0.811585 | ISLR2        | immunoglobulin superfamily containing leucine-rich repeat 2 |

|             |       |          |          |                 |                                                                                                                                                                            |
|-------------|-------|----------|----------|-----------------|----------------------------------------------------------------------------------------------------------------------------------------------------------------------------|
| 234848_at   | -2.55 | 0.012786 | 0.811585 | TCRA; TCRAV5.1a | Homo sapiens mRNA for T cell receptor alpha variable 6, partial cds, clone: SEB 201.; Homo sapiens mRNA for T cell receptor alpha variable 6, partial cds, clone: un 84-2. |
| 243342_at   | -6.52 | 0.012796 | 0.811585 |                 |                                                                                                                                                                            |
| 215941_at   | -2.82 | 0.012816 | 0.811585 |                 |                                                                                                                                                                            |
| 233994_at   | -5.7  | 0.012883 | 0.811585 |                 |                                                                                                                                                                            |
| 207309_at   | -3.75 | 0.012892 | 0.811585 | NOS1            | nitric oxide synthase 1 (neuronal)                                                                                                                                         |
| 216451_at   | -3.44 | 0.012907 | 0.811585 | STK38           | serine/threonine kinase 38                                                                                                                                                 |
| 211162_x_at | -4.21 | 0.012996 | 0.811585 | SCD             | stearoyl-CoA desaturase (delta-9-desaturase)                                                                                                                               |
| 221374_at   | -4.86 | 0.01303  | 0.811585 | FGF16           | fibroblast growth factor 16                                                                                                                                                |
| 234306_s_at | 2.31  | 0.013071 | 0.811585 | SLAMF7          | SLAM family member 7                                                                                                                                                       |
| 204293_at   | 4.72  | 0.013101 | 0.811585 | SGSH            | N-sulfoglucosamine sulfohydrolase                                                                                                                                          |
| 208283_at   | -3.07 | 0.013126 | 0.811585 | GAGE1           | G antigen 1                                                                                                                                                                |
| 229499_at   | -3.57 | 0.013127 | 0.811585 | CAPN13          | calpain 13                                                                                                                                                                 |
| 210107_at   | -4.71 | 0.013153 | 0.811585 | CLCA1           | chloride channel accessory 1                                                                                                                                               |
| 1555752_at  | -2.84 | 0.013163 | 0.811585 | STH             | saitohin                                                                                                                                                                   |
| 220756_s_at | -5.28 | 0.013236 | 0.811585 | SLC52A1         | solute carrier family 52 (riboflavin transporter), member 1                                                                                                                |

|             |       |          |          |             |                                                                 |
|-------------|-------|----------|----------|-------------|-----------------------------------------------------------------|
| 238830_at   | -5.3  | 0.013253 | 0.811585 | SOS2        | son of sevenless homolog 2 (Drosophila)                         |
| 229675_at   | -6.73 | 0.013266 | 0.811585 |             |                                                                 |
| 210727_at   | -2.77 | 0.013269 | 0.811585 | CALCA       | calcitonin-related polypeptide alpha                            |
| 1556829_at  | 4.17  | 0.0133   | 0.811585 | TIPARP-AS1  | TIPARP antisense RNA 1                                          |
| 1570447_at  | -3.95 | 0.013309 | 0.811585 | LINC00452   | long intergenic non-protein coding RNA 452                      |
| 226804_at   | 3.85  | 0.013333 | 0.811585 | FAM20A      | family with sequence similarity 20, member A                    |
| 236109_at   | -2.03 | 0.013418 | 0.811585 | RP11-50B3.4 |                                                                 |
| 241665_x_at | -5.44 | 0.013481 | 0.811585 |             |                                                                 |
| 203702_s_at | -2.64 | 0.013584 | 0.811585 | TTLL4       | tubulin tyrosine ligase-like family, member 4                   |
| 237913_at   | -3.39 | 0.013692 | 0.811585 |             |                                                                 |
| 227721_at   | -2.61 | 0.013693 | 0.811585 | CPAMD8      | C3 and PZP-like, alpha-2-macroglobulin domain containing 8      |
| 228689_at   | -2.28 | 0.013701 | 0.811585 | NDUFA11     | NADH dehydrogenase (ubiquinone) 1 alpha subcomplex, 11, 14.7kDa |
| 1552391_at  | -3.62 | 0.013749 | 0.811585 | CCDC185     | coiled-coil domain containing 185                               |
| 214625_s_at | -3.39 | 0.013758 | 0.811585 | MINK1       | misshapen-like kinase 1                                         |

|              |       |          |          |                 |                                                          |
|--------------|-------|----------|----------|-----------------|----------------------------------------------------------|
| 227910_at    | -2.73 | 0.013778 | 0.811585 | XPNPEP3         | X-prolyl aminopeptidase (aminopeptidase P) 3, putative   |
| 221017_s_at  | -6.77 | 0.013787 | 0.811585 | LRRC3           | leucine rich repeat containing 3                         |
| 1553037_a_at | -3.15 | 0.013837 | 0.811585 | SYN2            | synapsin II                                              |
| 240276_at    | -5.95 | 0.013871 | 0.811585 | RP11-108P20.4   |                                                          |
| 205031_at    | 6.13  | 0.013897 | 0.811585 | EFNB3           | ephrin-B3                                                |
| 1562016_at   | -6.18 | 0.013915 | 0.811585 |                 |                                                          |
| 213829_x_at  | -2.02 | 0.013947 | 0.811585 | RTEL1           | regulator of telomere elongation helicase 1              |
| 1555034_at   | -2.63 | 0.013986 | 0.811585 | CLRN1           | clarin 1                                                 |
| 231123_at    | -2.05 | 0.014093 | 0.811585 | TRIM36          | tripartite motif containing 36                           |
| 1553369_at   | 2.87  | 0.014117 | 0.811585 | FAM129C         | family with sequence similarity 129, member C            |
| 229667_s_at  | -5.68 | 0.014202 | 0.811585 | HOXB8           | homeobox B8                                              |
| 241195_at    | -2.96 | 0.014228 | 0.811585 |                 |                                                          |
| 211227_s_at  | -5.45 | 0.014245 | 0.811585 | PCDH11X; PCDH11 | protocadherin 11 X-linked; protocadherin 11 Y-linked     |
| 1556920_s_at | -2.25 | 0.014283 | 0.811585 | LINC01330       | long intergenic non-protein coding RNA 1330              |
| 206759_at    | -4.13 | 0.014291 | 0.811585 | FCER2           | Fc fragment of IgE, low affinity II, receptor for (CD23) |
| 241315_at    | -4.01 | 0.01433  | 0.811585 |                 |                                                          |
| 1561642_at   | -4.12 | 0.014369 | 0.811585 |                 |                                                          |
| 241807_x_at  | -2.6  | 0.014372 | 0.811585 |                 |                                                          |

|              |       |          |          |                  |                                                                               |
|--------------|-------|----------|----------|------------------|-------------------------------------------------------------------------------|
| 237779_at    | -2.3  | 0.014387 | 0.811585 | LOC100505711     | uncharacterized LOC100505711                                                  |
| 230877_at    | -2.04 | 0.014485 | 0.811585 | IGHD             | immunoglobulin heavy constant delta                                           |
| 237809_at    | -14.9 | 0.014486 | 0.811585 |                  |                                                                               |
| 1560030_at   | -2.75 | 0.014531 | 0.811585 | LOC283692        | uncharacterized LOC283692                                                     |
| 242833_at    | -6.49 | 0.014562 | 0.811585 | RP11-402G3.5     |                                                                               |
| 239458_at    | -2.37 | 0.014592 | 0.811585 | ALS2CR12         | amyotrophic lateral sclerosis 2 (juvenile)<br>chromosome region, candidate 12 |
| 214655_at    | 6     | 0.014648 | 0.811585 | GPR6             | G protein-coupled receptor 6                                                  |
| 234511_at    | -3.39 | 0.014652 | 0.811585 | ANKRD60          | ankyrin repeat domain 60                                                      |
| 206210_s_at  | -6.19 | 0.014653 | 0.811585 | CETP             | cholesteryl ester transfer protein, plasma                                    |
| 216478_at    | -4.57 | 0.014678 | 0.811585 |                  |                                                                               |
| 237477_at    | -6.26 | 0.014695 | 0.811585 | PDCL2            | phosducin-like 2                                                              |
| 1556034_s_at | 3.28  | 0.014735 | 0.811585 | MTMR11           | myotubularin related protein 11                                               |
| 242076_at    | -2.42 | 0.014771 | 0.811585 |                  |                                                                               |
| 230041_at    | -4.91 | 0.014839 | 0.811585 | AK024119; CTC-37 | Homo sapiens cDNA FLJ14057 fis, clone<br>HEMBB1000337.                        |
| 1555647_a_at | 3.06  | 0.014851 | 0.811585 | FOXP2            | forkhead box P2                                                               |
| 219702_at    | -2.13 | 0.014872 | 0.811585 | PLAC1            | placenta-specific 1                                                           |
| 240477_at    | -2.19 | 0.014899 | 0.811585 |                  |                                                                               |
| 210614_at    | -2.41 | 0.01492  | 0.811585 | TTPA             | tocopherol (alpha) transfer protein                                           |

|              |        |          |          |               |                                                       |
|--------------|--------|----------|----------|---------------|-------------------------------------------------------|
| 231563_at    | -2.21  | 0.014937 | 0.811585 | LOC100505824  | uncharacterized LOC100505824                          |
| 1553907_a_at | -20.38 | 0.014964 | 0.811585 | EXD1          | exonuclease 3'-5' domain containing 1                 |
| 236299_at    | -2.77  | 0.015102 | 0.811585 |               |                                                       |
| 203954_x_at  | -2.76  | 0.015112 | 0.811585 | CLDN3         | claudin 3                                             |
| 216679_at    | -2.86  | 0.015202 | 0.811585 | DDR1-AS1      | DDR1 antisense RNA 1 (head to head)                   |
| 233170_at    | -2.14  | 0.015205 | 0.811585 | LINC00348     | long intergenic non-protein coding RNA 348            |
| 1570314_at   | -10.84 | 0.015215 | 0.811585 |               |                                                       |
| 207392_x_at  | -4.92  | 0.015223 | 0.811585 | UGT2B15       | UDP glucuronosyltransferase 2 family, polypeptide B15 |
| 233491_at    | -2.23  | 0.015252 | 0.811585 | LOC100268168  | uncharacterized LOC100268168                          |
| 216791_at    | -2.61  | 0.015277 | 0.811585 |               |                                                       |
| 1566042_at   | -2.77  | 0.015482 | 0.811585 |               |                                                       |
| 207656_s_at  | -2.39  | 0.015504 | 0.811585 | ACOX1         | acyl-CoA oxidase 1, palmitoyl                         |
| 230694_at    | -2.71  | 0.015523 | 0.811585 |               |                                                       |
| 221660_at    | -2.27  | 0.015529 | 0.811585 | MYL10         | myosin, light chain 10, regulatory                    |
| 203681_at    | -3.53  | 0.01557  | 0.811585 | IVD           | isovaleryl-CoA dehydrogenase                          |
| 216572_at    | -3.05  | 0.015571 | 0.811585 | FOXL1         | forkhead box L1                                       |
| 242420_at    | -2.05  | 0.015603 | 0.811585 |               |                                                       |
| 210831_s_at  | -2.26  | 0.01564  | 0.811585 | PTGER3        | prostaglandin E receptor 3 (subtype EP3)              |
| 1570040_at   | -2.41  | 0.015653 | 0.811585 | RP11-748H22.1 |                                                       |

|              |       |          |          |                  |                                                                         |
|--------------|-------|----------|----------|------------------|-------------------------------------------------------------------------|
| 231529_at    | -2.24 | 0.015705 | 0.811585 | MEG3             | maternally expressed 3 (non-protein coding)                             |
| 214546_s_at  | -3.41 | 0.015826 | 0.811585 | P2RY11; PPAN-P2  | purinergic receptor P2Y, G-protein coupled, 11; PPAN-P2RY11 readthrough |
| 230453_s_at  | -5.57 | 0.015866 | 0.811585 | ATP2A3           | ATPase, Ca++ transporting, ubiquitous                                   |
| 230975_at    | -4.43 | 0.015896 | 0.811585 | RP11-109E10.1    |                                                                         |
| 225874_at    | 2.03  | 0.015906 | 0.811585 | UBALD1           | UBA-like domain containing 1                                            |
| 210797_s_at  | -2.24 | 0.015927 | 0.811585 | OASL             | 2'-5'-oligoadenylate synthetase-like                                    |
| 1557771_at   | -2.91 | 0.015956 | 0.811585 | FHAD1            | forkhead-associated (FHA) phosphopeptide binding domain 1               |
| 228701_at    | -6.22 | 0.015971 | 0.811585 | C8orf46          | chromosome 8 open reading frame 46                                      |
| 214558_at    | -2.5  | 0.015987 | 0.811585 | GPR12            | G protein-coupled receptor 12                                           |
| 1566870_at   | -2.45 | 0.016041 | 0.811585 |                  |                                                                         |
| 223938_at    | -3.31 | 0.016093 | 0.811585 | TEX35            | testis expressed 35                                                     |
| 230202_at    | -2.84 | 0.01612  | 0.811585 |                  |                                                                         |
| 217218_at    | -3.81 | 0.016124 | 0.811585 | WAPAL            | wings apart-like homolog (Drosophila)                                   |
| 244438_at    | -2.23 | 0.016131 | 0.811585 | AC010145.3; MYCN | MYCN upstream neighbor                                                  |
| 1556593_s_at | -2.65 | 0.01614  | 0.811585 |                  |                                                                         |
| 1563298_at   | -2.38 | 0.016145 | 0.811585 | LOC101927331     | uncharacterized LOC101927331                                            |

|              |        |          |          |              |                                                                   |
|--------------|--------|----------|----------|--------------|-------------------------------------------------------------------|
| 239508_x_at  | -2.06  | 0.016154 | 0.811585 | CCDC108      | coiled-coil domain containing 108                                 |
| 1567389_at   | -3.94  | 0.016197 | 0.811585 |              |                                                                   |
| 217706_at    | -2.97  | 0.016229 | 0.811585 |              |                                                                   |
| 1560281_a_at | -2.53  | 0.016249 | 0.811585 | TMEM95       | transmembrane protein 95                                          |
| 241047_at    | -8.01  | 0.016288 | 0.811585 | CASC15       | cancer susceptibility candidate 15 (non-protein coding)           |
| 242410_s_at  | -2.75  | 0.016295 | 0.811585 | CACNA1E      | calcium channel, voltage-dependent, R type, alpha 1E subunit      |
| 222739_at    | -5.75  | 0.016339 | 0.811585 | TMEM62       | transmembrane protein 62                                          |
| 235329_at    | -2.49  | 0.016358 | 0.811585 | NOXO1        | NADPH oxidase organizer 1                                         |
| 215960_at    | -5.8   | 0.016367 | 0.811585 | SLC5A4       | solute carrier family 5 (glucose activated ion channel), member 4 |
| 208314_at    | -2.66  | 0.016382 | 0.811585 | RRH          | retinal pigment epithelium-derived rhodopsin homolog              |
| 216947_at    | -5.91  | 0.016383 | 0.811585 | DES          | desmin                                                            |
| 242204_at    | -7.02  | 0.016515 | 0.811585 | WFDC5        | WAP four-disulfide core domain 5                                  |
| 221175_at    | -4.69  | 0.016592 | 0.811585 | C3orf36      | chromosome 3 open reading frame 36                                |
| 206575_at    | 2.82   | 0.016628 | 0.811585 | CDKL5        | cyclin-dependent kinase-like 5                                    |
| 241901_at    | 4      | 0.016685 | 0.811585 | LOC101929988 | uncharacterized LOC101929988                                      |
| 1563685_at   | -2.96  | 0.016728 | 0.811585 | LOC285422    | uncharacterized LOC285422                                         |
| 212315_s_at  | 2.86   | 0.016752 | 0.811585 | NUP210       | nucleoporin 210kDa                                                |
| 1564872_at   | -12.18 | 0.016764 | 0.811585 | AC002064.5   |                                                                   |

|             |       |          |          |              |                                                      |
|-------------|-------|----------|----------|--------------|------------------------------------------------------|
| 206644_at   | -5.4  | 0.016793 | 0.811585 | NR0B1        | nuclear receptor subfamily 0, group B, member 1      |
| 232550_at   | -4.53 | 0.016831 | 0.811585 | ABHD1        | abhydrolase domain containing 1                      |
| 235565_at   | -5.5  | 0.016913 | 0.811585 | ZNF425       | zinc finger protein 425                              |
| 204315_s_at | 2.45  | 0.016996 | 0.811585 | GTSE1        | G-2 and S-phase expressed 1                          |
| 1563808_at  | -3.99 | 0.017037 | 0.811585 | MCF2L        | MCF.2 cell line derived transforming sequence-like   |
| 1562752_at  | -8.76 | 0.01705  | 0.811585 |              |                                                      |
| 231595_at   | -2.01 | 0.017069 | 0.811585 | MRVI1-AS1    | MRVI1 antisense RNA 1                                |
| 204758_s_at | -2.93 | 0.01709  | 0.811585 | C2CD2L       | C2CD2-like                                           |
| 244572_at   | 2.84  | 0.017119 | 0.811585 | KY           | kyphoscoliosis peptidase                             |
| 243373_at   | -3.25 | 0.017168 | 0.811585 |              |                                                      |
| 224421_x_at | -5.29 | 0.017174 | 0.811585 | PMCHL1       | pro-melanin-concentrating hormone-like 1, pseudogene |
| 237576_x_at | -2.02 | 0.017202 | 0.811585 | LOC101927093 | uncharacterized LOC101927093                         |
| 220448_at   | 7.41  | 0.017248 | 0.811585 | KCNK12       | potassium channel, subfamily K, member 12            |
| 1555092_at  | -2.61 | 0.01726  | 0.811585 | VASH2        | vasohibin 2                                          |
| 1560989_at  | -2.92 | 0.017273 | 0.811585 |              |                                                      |
| 207658_s_at | -2.85 | 0.017315 | 0.811585 | FOXG1        | forkhead box G1                                      |
| 233847_x_at | -4.48 | 0.017323 | 0.811585 |              |                                                      |
| 208457_at   | -4.38 | 0.017431 | 0.811585 | GABRD        | gamma-aminobutyric acid (GABA) A receptor, delta     |
| 210730_s_at | -2.89 | 0.017439 | 0.811585 | NPY2R        | neuropeptide Y receptor Y2                           |

|              |        |          |          |              |                                                   |
|--------------|--------|----------|----------|--------------|---------------------------------------------------|
| 1556627_at   | -6.26  | 0.017464 | 0.811585 | DRP2         | dystrophin related protein 2                      |
| 207241_at    | 3.49   | 0.017484 | 0.811585 | C4orf6       | chromosome 4 open reading frame 6                 |
| 1560164_at   | -3.44  | 0.017499 | 0.811585 | LOC101927990 | uncharacterized LOC101927990                      |
| 239473_x_at  | -2.2   | 0.017501 | 0.811585 | MAP6D1       | MAP6 domain containing 1                          |
| 1557869_at   | -4.78  | 0.017506 | 0.811585 |              |                                                   |
| 207682_s_at  | -3.69  | 0.017536 | 0.811585 | KIF25        | kinesin family member 25                          |
| 1560958_s_at | -3.16  | 0.017539 | 0.811585 | LOC101928516 | uncharacterized LOC101928516                      |
| 233612_at    | -2.3   | 0.017542 | 0.811585 |              |                                                   |
| 1564049_at   | -4.92  | 0.017577 | 0.811585 | LOC339593    | uncharacterized LOC339593                         |
| 205166_at    | -2.03  | 0.017586 | 0.811585 | CAPN5        | calpain 5                                         |
| 1563054_at   | -25.97 | 0.017606 | 0.811585 |              |                                                   |
| 220191_at    | -3.66  | 0.017607 | 0.811585 | GKN1         | gastrokine 1                                      |
| 209855_s_at  | -2.41  | 0.01763  | 0.811585 | KLK2         | kallikrein-related peptidase 2                    |
| 238895_at    | -2.13  | 0.017675 | 0.811585 |              |                                                   |
| 222818_at    | -3.4   | 0.017678 | 0.811585 | OSBPL10      | oxysterol binding protein-like 10                 |
| 241289_at    | 3.29   | 0.017683 | 0.811585 |              |                                                   |
| 240022_at    | -3.65  | 0.017686 | 0.811585 | ZC3H4        | zinc finger CCCH-type containing 4                |
| 1558602_a_at | -4.36  | 0.017697 | 0.811585 | TUSC7        | tumor suppressor candidate 7 (non-protein coding) |
| 1554141_s_at | -7.37  | 0.017761 | 0.811585 | WDR78        | WD repeat domain 78                               |
| 224348_s_at  | -2.05  | 0.01779  | 0.811585 | HOTS         | H19 Opposite Tumor Suppressor                     |

|              |       |          |          |              |                                                                                 |
|--------------|-------|----------|----------|--------------|---------------------------------------------------------------------------------|
| 1553586_at   | -2.64 | 0.017821 | 0.811585 | FBXL19-AS1   | FBXL19 antisense RNA 1 (head to head)                                           |
| 215606_s_at  | -2.37 | 0.017951 | 0.811585 | ERC1         | ELKS/RAB6-interacting/CAST family member 1                                      |
| 207154_at    | -3.08 | 0.018024 | 0.811585 | DIO3         | deiodinase, iodothyronine, type III                                             |
| 244225_x_at  | -3.57 | 0.018079 | 0.811585 | LMNA         | lamin A/C                                                                       |
| 239805_at    | -2.61 | 0.018095 | 0.811585 | SLC13A2      | solute carrier family 13 (sodium-dependent dicarboxylate transporter), member 2 |
| 1569461_at   | -6.55 | 0.018113 | 0.811585 | KCNT1        | potassium channel, subfamily T, member 1                                        |
| 212805_at    | 2.05  | 0.018193 | 0.811585 | PRUNE2       | prune homolog 2 (Drosophila)                                                    |
| 1561558_at   | -4.12 | 0.018213 | 0.811585 | PRKG1-AS1    | PRKG1 antisense RNA 1                                                           |
| 1562541_at   | -3.86 | 0.018262 | 0.811585 |              |                                                                                 |
| 240736_at    | 4.6   | 0.018273 | 0.811585 |              |                                                                                 |
| 1564360_a_at | -4.07 | 0.018297 | 0.811585 | LOC440416    | uncharacterized LOC440416                                                       |
| 203409_at    | 2.32  | 0.018315 | 0.811585 | DDB2         | damage-specific DNA binding protein 2, 48kDa                                    |
| 1565111_x_at | -4.94 | 0.018323 | 0.811585 | OFCC1        | orofacial cleft 1 candidate 1                                                   |
| 226248_s_at  | -2.85 | 0.018355 | 0.811585 | KIAA1324     | KIAA1324                                                                        |
| 1561905_at   | -2.25 | 0.018413 | 0.811585 | BC048141     | Homo sapiens cDNA clone IMAGE:4798845.                                          |
| 237685_at    | -3.65 | 0.018426 | 0.811585 | LOC101929926 | uncharacterized LOC101929926                                                    |

|              |       |          |          |              |                                                                                                     |
|--------------|-------|----------|----------|--------------|-----------------------------------------------------------------------------------------------------|
| 217195_at    | -3.61 | 0.018444 | 0.811585 | GCNT1P1      | glucosaminyl (N-acetyl) transferase 1, core 2 pseudogene 1                                          |
| 1563396_x_at | -3.66 | 0.018476 | 0.811585 | CTC-384G19.1 |                                                                                                     |
| 1554961_at   | -2.2  | 0.01852  | 0.811585 | FGFR4        | fibroblast growth factor receptor 4                                                                 |
| 239565_at    | -2.66 | 0.01852  | 0.811585 | DLG5-AS1     | DLG5 antisense RNA 1                                                                                |
| 216864_at    | -4.61 | 0.018527 | 0.811585 |              |                                                                                                     |
| 1564628_at   | -2.23 | 0.018561 | 0.811585 |              |                                                                                                     |
| 1568191_at   | -2.86 | 0.01858  | 0.811585 |              |                                                                                                     |
| 231333_at    | -2.67 | 0.018643 | 0.811585 | LOC100505515 | uncharacterized LOC100505515                                                                        |
| 221309_at    | -2.35 | 0.018653 | 0.811585 | RBM17        | RNA binding motif protein 17                                                                        |
| 237965_at    | -2.29 | 0.018655 | 0.811585 |              |                                                                                                     |
| 235665_at    | -4.26 | 0.018668 | 0.811585 | AC018766.6   |                                                                                                     |
| 223603_at    | 2.48  | 0.018731 | 0.811585 | RNF112       | ring finger protein 112                                                                             |
| 208599_at    | 2.32  | 0.018761 | 0.811585 | HUWE1        | HECT, UBA and WWE domain containing 1, E3 ubiquitin protein ligase                                  |
| 232856_at    | -2.96 | 0.018876 | 0.811585 | LRRC55       | leucine rich repeat containing 55                                                                   |
| 232707_at    | -6.51 | 0.018887 | 0.811585 | ISX          | intestine-specific homeobox                                                                         |
| 208479_at    | -2.22 | 0.01891  | 0.811585 | KCNA1        | potassium voltage-gated channel, shaker-related subfamily, member 1 (episodic ataxia with myokymia) |

|              |        |          |          |                |                                                                                  |
|--------------|--------|----------|----------|----------------|----------------------------------------------------------------------------------|
| 1558489_at   | 9.85   | 0.01891  | 0.811585 |                |                                                                                  |
| 243186_at    | -2.1   | 0.018922 | 0.811585 |                |                                                                                  |
| 219780_at    | -10.25 | 0.018975 | 0.811585 | ZNF771         | zinc finger protein 771                                                          |
| 241513_at    | 3.62   | 0.019036 | 0.811585 | RP11-1152H14.1 |                                                                                  |
| 204914_s_at  | -7.13  | 0.019036 | 0.811585 | SOX11          | SRY (sex determining region Y)-box 11                                            |
| 241543_at    | -5.55  | 0.019086 | 0.811585 |                |                                                                                  |
| 221125_s_at  | 4.88   | 0.019095 | 0.811585 | KCNMB3         | potassium large conductance calcium-activated channel, subfamily M beta member 3 |
| 241485_at    | 2.75   | 0.019109 | 0.811585 | MYT1L          | myelin transcription factor 1-like                                               |
| 1562214_at   | -2.86  | 0.019119 | 0.811585 | LINC01107      | long intergenic non-protein coding RNA 1107                                      |
| 240021_at    | -2.39  | 0.019165 | 0.811585 |                |                                                                                  |
| 1552629_a_at | -3.03  | 0.019256 | 0.811585 | JMJD6          | jumonji domain containing 6                                                      |
| 237775_x_at  | -2.23  | 0.019296 | 0.811585 |                |                                                                                  |
| 208333_at    | -3.23  | 0.019299 | 0.811585 | LHX5           | LIM homeobox 5                                                                   |
| 227140_at    | 2.34   | 0.019312 | 0.811585 | INHBA          | inhibin, beta A                                                                  |
| 220747_at    | -4.06  | 0.019368 | 0.811585 | LINC00652      | long intergenic non-protein coding RNA 652                                       |
| 241213_x_at  | -3.57  | 0.019498 | 0.811585 |                |                                                                                  |
| 244637_at    | -2.43  | 0.019499 | 0.811585 |                |                                                                                  |
| 215817_at    | -4.44  | 0.019511 | 0.811585 | SERPINB13      | serpin peptidase inhibitor, clade B (ovalbumin), member 13                       |

|              |        |          |          |                  |                                                                              |
|--------------|--------|----------|----------|------------------|------------------------------------------------------------------------------|
| 221354_s_at  | -7.89  | 0.01952  | 0.811585 | MCHR1            | melanin-concentrating hormone receptor 1                                     |
| 236156_at    | -3     | 0.019528 | 0.811585 | LIPA; LOC1019268 | lipase A, lysosomal acid, cholesterol esterase; uncharacterized LOC101926887 |
| 208352_x_at  | -2.54  | 0.019576 | 0.811585 | ANK1             | ankyrin 1, erythrocytic                                                      |
| 1556505_at   | -2.19  | 0.019581 | 0.811585 | LINC00605        | long intergenic non-protein coding RNA 605                                   |
| 235247_at    | -5     | 0.019603 | 0.811585 |                  |                                                                              |
| 238246_at    | -14.36 | 0.019702 | 0.811585 | MTL5             | metallothionein-like 5, testis-specific (tesmin)                             |
| 1553212_at   | 5.42   | 0.019705 | 0.811585 | KRT78            | keratin 78                                                                   |
| 207686_s_at  | 2.48   | 0.019712 | 0.811585 | CASP8            | caspase 8, apoptosis-related cysteine peptidase                              |
| 1556971_a_at | -3.23  | 0.019727 | 0.811585 | RP11-85A1.3      |                                                                              |
| 219745_at    | 2.4    | 0.019746 | 0.811585 | TMEM180          | transmembrane protein 180                                                    |
| 203001_s_at  | -7.1   | 0.019773 | 0.811585 | STMN2            | stathmin 2                                                                   |
| 1560903_at   | -3.58  | 0.019813 | 0.811585 | CTA-254O6.1      |                                                                              |
| 1556201_at   | -2.6   | 0.019853 | 0.811585 | RNASET2          | ribonuclease T2                                                              |
| 1559228_at   | -2.06  | 0.019891 | 0.811585 | CLU              | clusterin                                                                    |
| 207784_at    | -3.03  | 0.019914 | 0.811585 | ARSD             | arylsulfatase D                                                              |
| 220790_s_at  | -4.61  | 0.019968 | 0.811585 | MS4A5            | membrane-spanning 4-domains, subfamily A, member 5                           |
| 216444_at    | -2.9   | 0.020031 | 0.811585 |                  |                                                                              |

|              |       |          |          |              |                                                                         |
|--------------|-------|----------|----------|--------------|-------------------------------------------------------------------------|
| 244681_at    | -2.02 | 0.020054 | 0.811585 | NUP210P1     | nucleoporin 210kDa pseudogene 1                                         |
| 1564548_at   | -2.68 | 0.020123 | 0.811585 | LOC642620    | uncharacterized LOC642620                                               |
| 230824_at    | -2.3  | 0.020162 | 0.811585 | 10-Mar       | membrane-associated ring finger (C3HC4) 10, E3 ubiquitin protein ligase |
| 222936_s_at  | 7.99  | 0.020166 | 0.811585 | DESI2        | desumoylating isopeptidase 2                                            |
| 230935_at    | -3.64 | 0.020169 | 0.811585 | HAGLROS      | HAGLR opposite strand (non-protein coding)                              |
| 1558577_at   | -2.38 | 0.020173 | 0.811585 | LOC148709    | actin pseudogene                                                        |
| 214382_at    | -4.75 | 0.02018  | 0.811585 | UNC93A       | unc-93 homolog A (C. elegans)                                           |
| 244820_at    | -3.53 | 0.020213 | 0.811585 |              |                                                                         |
| 222278_at    | 6.11  | 0.020218 | 0.811585 | LOC101929726 | uncharacterized LOC101929726                                            |
| 1569446_x_at | -2.38 | 0.020235 | 0.811585 | DGCR5        | DiGeorge syndrome critical region gene 5 (non-protein coding)           |
| 1569310_at   | -3.79 | 0.020277 | 0.811585 | IRGQ         | immunity-related GTPase family, Q                                       |
| 233948_at    | -5.09 | 0.02036  | 0.811585 | TBX5-AS1     | TBX5 antisense RNA 1                                                    |
| 228475_at    | -3.86 | 0.020367 | 0.811585 | CCDC61       | coiled-coil domain containing 61                                        |
| 1555664_at   | -3.55 | 0.020382 | 0.811585 |              |                                                                         |
| 244117_at    | 7.61  | 0.020405 | 0.811585 |              |                                                                         |
| 241051_at    | -3.4  | 0.020453 | 0.811585 |              |                                                                         |
| 1570350_at   | -2.93 | 0.020483 | 0.811585 | LOC101928269 | uncharacterized LOC101928269                                            |

|              |       |          |          |           |                                                          |
|--------------|-------|----------|----------|-----------|----------------------------------------------------------|
| 229651_at    | -3.33 | 0.02049  | 0.811585 | SEZ6      | seizure related 6 homolog (mouse)                        |
| 241760_x_at  | -3.83 | 0.020618 | 0.811585 | RORA      | RAR-related orphan receptor A                            |
| 214990_at    | -4.32 | 0.020645 | 0.811585 | PIGO      | phosphatidylinositol glycan anchor biosynthesis, class O |
| 1564209_at   | -5.15 | 0.020669 | 0.811585 | LINC00700 | long intergenic non-protein coding RNA 700               |
| 241166_at    | -5.17 | 0.020676 | 0.811585 | CEP41     | centrosomal protein 41kDa                                |
| 234381_at    | -2.62 | 0.020738 | 0.811585 | IGLV4-3   | immunoglobulin lambda variable 4-3                       |
| 221668_s_at  | -2.56 | 0.020748 | 0.811585 | DNAI2     | dynein, axonemal, intermediate chain 2                   |
| 243810_at    | -3.72 | 0.02076  | 0.811585 |           |                                                          |
| 234011_at    | -2.47 | 0.020809 | 0.811585 |           |                                                          |
| 1555783_x_at | 2.71  | 0.020821 | 0.811585 | PQLC2     | PQ loop repeat containing 2                              |
| 243771_at    | -2.3  | 0.020828 | 0.811585 |           |                                                          |
| 214922_at    | -2.47 | 0.020829 | 0.811585 | ZNF484    | zinc finger protein 484                                  |
| 205538_at    | -2.42 | 0.020831 | 0.811585 | CORO2A    | coronin, actin binding protein, 2A                       |
| 242219_at    | 3.96  | 0.020854 | 0.811585 |           |                                                          |
| 1552522_at   | -3.99 | 0.020871 | 0.811585 | TIGD4     | tigger transposable element derived 4                    |
| 216419_at    | -4.45 | 0.02092  | 0.811585 | CROCC     | ciliary rootlet coiled-coil, rootletin                   |
| 220214_at    | 3.24  | 0.020935 | 0.811585 | ZNF215    | zinc finger protein 215                                  |

|             |       |          |          |           |                                                     |
|-------------|-------|----------|----------|-----------|-----------------------------------------------------|
| 210850_s_at | 2.26  | 0.020952 | 0.811585 | ELK1      | ELK1, member of ETS oncogene family                 |
| 202255_s_at | 2.79  | 0.020962 | 0.811585 | SIPA1L1   | signal-induced proliferation-associated 1 like 1    |
| 228610_at   | -2.05 | 0.021053 | 0.811585 | TM9SF3    | transmembrane 9 superfamily member 3                |
| 237271_at   | -2.69 | 0.02106  | 0.811585 | LOC154872 | putative uncharacterized protein<br>LOC154872       |
| 1553842_at  | -8.61 | 0.021088 | 0.811585 | BEND2     | BEN domain containing 2                             |
| 210167_s_at | -3.74 | 0.021097 | 0.811585 | TEF       | thyrotrophic embryonic factor                       |
| 1554882_at  | -3.75 | 0.021146 | 0.811585 | ERCC8     | excision repair cross-complementation<br>group 8    |
| 1569063_at  | -5.4  | 0.021213 | 0.811585 |           |                                                     |
| 233622_x_at | -4.22 | 0.021228 | 0.811585 |           |                                                     |
| 234694_at   | -2.92 | 0.021273 | 0.811585 | CNTROB    | centrobin, centrosomal BRCA2<br>interacting protein |
| 241585_at   | -3.96 | 0.021355 | 0.811585 | LRRC4C    | leucine rich repeat containing 4C                   |
| 1559268_at  | -2.03 | 0.021378 | 0.811585 | ADAM23    | ADAM metallopeptidase domain 23                     |
| 219085_s_at | -4.32 | 0.021397 | 0.811585 | GEMIN7    | gem (nuclear organelle) associated<br>protein 7     |
| 1562478_at  | -2.98 | 0.021432 | 0.811585 | LINC00659 | long intergenic non-protein coding RNA<br>659       |

|             |       |          |          |                  |                                                                                              |
|-------------|-------|----------|----------|------------------|----------------------------------------------------------------------------------------------|
| 229564_at   | 3.61  | 0.021529 | 0.811585 | RRP7A            | ribosomal RNA processing 7 homolog A (S. cerevisiae)                                         |
| 1557896_at  | -8.35 | 0.021552 | 0.811585 | BC041003; RP11-4 | Homo sapiens cDNA clone IMAGE:5275288.                                                       |
| 231036_at   | 4.27  | 0.021566 | 0.811585 | LOC100505774     | uncharacterized LOC100505774                                                                 |
| 205445_at   | -2.39 | 0.021569 | 0.811585 | PRL              | prolactin                                                                                    |
| 207530_s_at | -7.58 | 0.021604 | 0.811585 | CDKN2B           | cyclin-dependent kinase inhibitor 2B (p15, inhibits CDK4)                                    |
| 234514_at   | -4.5  | 0.021621 | 0.811585 | SRMS             | src-related kinase lacking C-terminal regulatory tyrosine and N-terminal myristylation sites |
| 205902_at   | 4.1   | 0.021697 | 0.811585 | KCNN3            | potassium intermediate/small conductance calcium-activated channel, subfamily N, member 3    |
| 1557219_at  | -6.91 | 0.021711 | 0.811585 | LOC100506827     | uncharacterized LOC100506827                                                                 |
| 227177_at   | -2.53 | 0.021721 | 0.811585 | CORO2A           | coronin, actin binding protein, 2A                                                           |
| 1569929_at  | -5.12 | 0.021741 | 0.811585 |                  |                                                                                              |
| 224128_at   | -2.53 | 0.021828 | 0.811585 | RTFDC1           | replication termination factor 2 domain containing 1                                         |
| 207325_x_at | -3.4  | 0.021843 | 0.811585 | MAGEA1           | melanoma antigen family A, 1 (directs expression of antigen MZ2-E)                           |

|              |        |          |          |                 |                                                                                                 |
|--------------|--------|----------|----------|-----------------|-------------------------------------------------------------------------------------------------|
| 1558945_s_at | -10.45 | 0.021875 | 0.811585 | CACNA1A; LOC100 | calcium channel, voltage-dependent, P/Q type, alpha 1A subunit; uncharacterized<br>LOC100507353 |
| 1553995_a_at | 2.36   | 0.021876 | 0.811585 | NT5E            | 5'-nucleotidase, ecto (CD73)                                                                    |
| 1565320_at   | -4.33  | 0.021902 | 0.811585 | RBM3AP          | RNA binding motif protein, Y-linked, family 3, member A pseudogene                              |
| 1564729_at   | -6.66  | 0.021945 | 0.811585 | LOC101928666    | uncharacterized LOC101928666                                                                    |
| 225503_at    | 3.98   | 0.021969 | 0.811585 | DHRSX           | dehydrogenase/reductase (SDR family)<br>X-linked                                                |
| 240379_at    | 2.47   | 0.021992 | 0.811585 | PKP4            | plakophilin 4                                                                                   |
| 1556449_at   | -3.42  | 0.022029 | 0.811585 |                 |                                                                                                 |
| 244543_s_at  | 3.07   | 0.02207  | 0.811585 | BCDIN3D-AS1     | BCDIN3D antisense RNA 1                                                                         |
| 244542_at    | -3.15  | 0.022111 | 0.811585 | BCDIN3D-AS1     | BCDIN3D antisense RNA 1                                                                         |
| 221120_at    | -2.17  | 0.022125 | 0.811585 |                 |                                                                                                 |
| 1569873_at   | -7.15  | 0.022223 | 0.811585 | LIPJ            | lipase, family member J                                                                         |
| 235310_at    | -2.99  | 0.022256 | 0.811585 | GCSAM           | germinal center-associated, signaling and motility                                              |
| 220291_at    | -2.47  | 0.022284 | 0.811585 | GDPD2           | glycerophosphodiester<br>phosphodiesterase domain containing 2                                  |
| 214903_at    | -2.73  | 0.022287 | 0.811585 | SYT2            | synaptotagmin II                                                                                |
| 238962_at    | 2.97   | 0.022323 | 0.811585 | ZNF681          | zinc finger protein 681                                                                         |

|              |       |          |          |              |                                                                     |
|--------------|-------|----------|----------|--------------|---------------------------------------------------------------------|
| 210363_s_at  | -3.41 | 0.022327 | 0.811585 | SCN2B        | sodium channel, voltage-gated, type II, beta subunit                |
| 238088_at    | -2.47 | 0.022345 | 0.811585 |              |                                                                     |
| 1554616_at   | -2.42 | 0.022351 | 0.811585 | SERPINB8     | serpin peptidase inhibitor, clade B (ovalbumin), member 8           |
| 243994_at    | -5.06 | 0.022428 | 0.811585 |              |                                                                     |
| 219305_x_at  | 3.99  | 0.022443 | 0.811585 | FBXO2        | F-box protein 2                                                     |
| 236481_at    | -3.29 | 0.022448 | 0.811585 | FAH          | fumarylacetoacetate hydrolase (fumarylacetoacetase)                 |
| 1561966_at   | -2.08 | 0.02246  | 0.811585 | BC041363     | Homo sapiens cDNA clone IMAGE:5273212.                              |
| 227938_s_at  | -6.97 | 0.022495 | 0.811585 | DLL1         | delta-like 1 (Drosophila)                                           |
| 232631_at    | -5.9  | 0.022495 | 0.811585 | CDH6         | cadherin 6, type 2, K-cadherin (fetal kidney)                       |
| 239141_at    | -2.66 | 0.022516 | 0.811585 | LOC100126784 | uncharacterized LOC100126784                                        |
| 217163_at    | -6.41 | 0.022526 | 0.811585 | ESR1         | estrogen receptor 1                                                 |
| 210767_at    | -4.92 | 0.022551 | 0.811585 | NF2          | neurofibromin 2 (merlin)                                            |
| 1569218_at   | -4.65 | 0.022566 | 0.811585 | LOC101927003 | uncharacterized LOC101927003                                        |
| 238770_at    | -5.04 | 0.022575 | 0.811585 | KIAA1456     | KIAA1456                                                            |
| 1555085_at   | -3.06 | 0.0226   | 0.811585 | LOC101928751 | uncharacterized LOC101928751                                        |
| 1553151_at   | -4.56 | 0.022621 | 0.811585 | ATP6V0D2     | ATPase, H <sup>+</sup> transporting, lysosomal 38kDa, V0 subunit d2 |
| 1556859_a_at | -7.34 | 0.022659 | 0.811585 | LOC285740    | uncharacterized LOC285740                                           |

|              |        |          |          |                 |                                                        |
|--------------|--------|----------|----------|-----------------|--------------------------------------------------------|
| 208294_x_at  | -2.58  | 0.022718 | 0.811585 | CSHL1           | chorionic somatomammotropin hormone-like 1             |
| 1561034_at   | 3.36   | 0.022768 | 0.811585 | RP11-510C10.2   |                                                        |
| 231463_at    | -2.55  | 0.022783 | 0.811585 | CNTD1           | cyclin N-terminal domain containing 1                  |
| 1554224_at   | -5.06  | 0.022843 | 0.811585 | LOC101929497    | uncharacterized LOC101929497                           |
| 1553568_a_at | -2.22  | 0.022919 | 0.811585 | HIST1H1T        | histone cluster 1, H1t                                 |
| 217660_at    | -6.27  | 0.022946 | 0.811585 | MYH14           | myosin, heavy chain 14, non-muscle                     |
| 207588_at    | -10.39 | 0.022975 | 0.811585 |                 |                                                        |
| 213412_at    | -2.49  | 0.023016 | 0.811585 | TJP3            | tight junction protein 3                               |
| 220804_s_at  | -2.44  | 0.023019 | 0.811585 | TP73            | tumor protein p73                                      |
| 1559461_at   | -2.75  | 0.02305  | 0.811585 |                 |                                                        |
| 244879_at    | -2.46  | 0.023051 | 0.811585 |                 |                                                        |
| 1566515_at   | -3.13  | 0.023076 | 0.811585 | CWF19L2         | CWF19-like 2, cell cycle control (S. pombe)            |
| 237941_at    | 7.34   | 0.023115 | 0.811585 |                 |                                                        |
| 1552436_a_at | -2.21  | 0.02314  | 0.811585 | CDH23; LOC10065 | cadherin-related 23; cadherin-23-like                  |
| 232660_at    | -4.76  | 0.023254 | 0.811585 | BAD             | BCL2-associated agonist of cell death                  |
| 236741_at    | -2.84  | 0.023281 | 0.811585 | WDR72           | WD repeat domain 72                                    |
| 229154_at    | -11.01 | 0.023328 | 0.811585 | WNT10A          | wingless-type MMTV integration site family, member 10A |

|             |        |          |          |          |                                                         |
|-------------|--------|----------|----------|----------|---------------------------------------------------------|
| 205185_at   | -2.29  | 0.023389 | 0.811585 | SPINK5   | serine peptidase inhibitor, Kazal type 5                |
| 206869_at   | -3.76  | 0.023469 | 0.811585 | CHAD     | chondroadherin                                          |
| 213668_s_at | 2.16   | 0.023475 | 0.811585 | SOX4     | SRY (sex determining region Y)-box 4                    |
| 216876_s_at | -6.54  | 0.023491 | 0.811585 | IL17A    | interleukin 17A                                         |
| 229639_s_at | -8.43  | 0.023526 | 0.811585 | SLC19A1  | solute carrier family 19 (folate transporter), member 1 |
| 228942_s_at | 3.17   | 0.023555 | 0.811585 | DAB2IP   | DAB2 interacting protein                                |
| 221948_s_at | -5.14  | 0.023566 | 0.811585 | KLHL22   | kelch-like family member 22                             |
| 240801_at   | -3.89  | 0.023664 | 0.811585 | C21orf37 | chromosome 21 open reading frame 37                     |
| 215998_at   | -2.36  | 0.023678 | 0.811585 |          |                                                         |
| 237928_at   | -2.78  | 0.02372  | 0.811585 |          |                                                         |
| 205744_at   | -2.61  | 0.023768 | 0.811585 | DOC2A    | double C2-like domains, alpha                           |
| 217238_s_at | -3.48  | 0.023812 | 0.811585 | ALDOB    | aldolase B, fructose-bisphosphate                       |
| 206824_at   | -4.01  | 0.023826 | 0.811585 | CES1P1   | carboxylesterase 1 pseudogene 1                         |
| 206813_at   | 2.36   | 0.02384  | 0.811585 | CTF1     | cardiotrophin 1                                         |
| 206333_at   | -10.61 | 0.023888 | 0.811585 | MSI1     | musashi RNA-binding protein 1                           |
| 210419_at   | -4.07  | 0.023906 | 0.811585 | BARX2    | BARX homeobox 2                                         |
| 216746_at   | -2.9   | 0.023914 | 0.811585 |          |                                                         |
| 243429_at   | -3.54  | 0.023922 | 0.811585 |          |                                                         |
| 1554646_at  | -2.02  | 0.023923 | 0.811585 | OSBPL1A  | oxysterol binding protein-like 1A                       |

|             |        |          |          |              |                                                                      |
|-------------|--------|----------|----------|--------------|----------------------------------------------------------------------|
| 215355_at   | -4.05  | 0.023932 | 0.811585 | POU2F3       | POU class 2 homeobox 3                                               |
| 206546_at   | -2.26  | 0.024    | 0.811585 | SYCP2        | synaptonemal complex protein 2                                       |
| 236888_at   | -3.89  | 0.024039 | 0.811585 | CAPZA3       | capping protein (actin filament) muscle Z-line, alpha 3              |
| 231456_at   | -2.09  | 0.024057 | 0.811585 |              |                                                                      |
| 1568662_at  | -2.27  | 0.024107 | 0.811585 | PWRN2        | Prader-Willi region non-protein coding RNA 2                         |
| 234246_at   | -3.28  | 0.024155 | 0.811585 |              |                                                                      |
| 234356_at   | -2.14  | 0.024176 | 0.811585 | DKFZP434K028 | uncharacterized LOC26070                                             |
| 242090_x_at | -15.96 | 0.024183 | 0.811585 |              |                                                                      |
| 1552988_at  | -2.41  | 0.024194 | 0.811585 | C11orf65     | chromosome 11 open reading frame 65                                  |
| 239626_x_at | -2.47  | 0.024222 | 0.811585 | TM9SF3       | transmembrane 9 superfamily member 3                                 |
| 233488_at   | -4.17  | 0.02425  | 0.811585 | RNASE7       | ribonuclease, RNase A family, 7                                      |
| 207139_at   | 3.77   | 0.024258 | 0.811585 | ATP4A        | ATPase, H <sup>+</sup> /K <sup>+</sup> exchanging, alpha polypeptide |
| 1562510_at  | -2.94  | 0.024284 | 0.811585 | LINC01343    | long intergenic non-protein coding RNA 1343                          |
| 208006_at   | -2.26  | 0.024288 | 0.811585 | FOXI1        | forkhead box I1                                                      |
| 240283_at   | -3.14  | 0.024375 | 0.811585 |              |                                                                      |
| 243777_at   | -6.27  | 0.024378 | 0.811585 | RAB29        | RAB29, member RAS oncogene family                                    |
| 237259_at   | -2.93  | 0.024409 | 0.811585 |              |                                                                      |

|             |       |          |          |                 |                                                                       |
|-------------|-------|----------|----------|-----------------|-----------------------------------------------------------------------|
| 1563792_at  | -2.15 | 0.024432 | 0.811585 | AMN             | amnion associated transmembrane protein                               |
| 243996_at   | 2.42  | 0.024437 | 0.811585 | RP11-112J3.16   |                                                                       |
| 210893_at   | -6.35 | 0.024466 | 0.811585 |                 |                                                                       |
| 234367_x_at | -2.02 | 0.024475 | 0.811585 | TMPRSS6         | transmembrane protease, serine 6                                      |
| 206251_s_at | -2.26 | 0.024486 | 0.811585 | AVPR1A          | arginine vasopressin receptor 1A                                      |
| 207617_at   | -4.11 | 0.024505 | 0.811585 | DDX3X           | DEAD (Asp-Glu-Ala-Asp) box helicase 3, X-linked                       |
| 217224_at   | -2.35 | 0.024561 | 0.811585 | OR1E3           | olfactory receptor, family 1, subfamily E, member 3 (gene/pseudogene) |
| 237358_at   | -5.97 | 0.024564 | 0.811585 | RP4-555D20.3    |                                                                       |
| 1554117_at  | -5.28 | 0.024568 | 0.811585 | CCDC60          | coiled-coil domain containing 60                                      |
| 227223_at   | -2.11 | 0.024589 | 0.811585 | RBM39           | RNA binding motif protein 39                                          |
| 239011_at   | -4.71 | 0.024596 | 0.811585 | LOC102724965    | collagen alpha-2(I) chain-like                                        |
| 221723_s_at | -2.06 | 0.024619 | 0.811585 | SLC4A5          | solute carrier family 4 (sodium bicarbonate cotransporter), member 5  |
| 1561222_at  | 14.35 | 0.024622 | 0.811585 | LINC00485       | long intergenic non-protein coding RNA 485                            |
| 1556992_at  | -2.68 | 0.024635 | 0.811585 | LOC550113; UBA6 | uncharacterized LOC550113; UBA6 antisense RNA 1 (head to head)        |

|              |       |          |          |                        |                                                                                                                                                      |
|--------------|-------|----------|----------|------------------------|------------------------------------------------------------------------------------------------------------------------------------------------------|
| 207763_at    | -5.78 | 0.024682 | 0.811585 | S100A5                 | S100 calcium binding protein A5                                                                                                                      |
| 229643_at    | -5.59 | 0.024701 | 0.811585 | AC078883.3; AC078883.4 |                                                                                                                                                      |
| 205534_at    | 2.61  | 0.024709 | 0.811585 | PCDH7                  | protocadherin 7                                                                                                                                      |
| 1562313_at   | -2.43 | 0.024739 | 0.811585 | BCORP1                 | BCL6 corepressor pseudogene 1                                                                                                                        |
| 1569443_s_at | -3.03 | 0.024771 | 0.811585 |                        |                                                                                                                                                      |
| 243670_at    | -2.74 | 0.024772 | 0.811585 |                        |                                                                                                                                                      |
| 217096_at    | -4.5  | 0.024822 | 0.811585 | PCLO                   | piccolo presynaptic cytomatrix protein                                                                                                               |
| 205602_x_at  | -2.18 | 0.024937 | 0.811585 | PSG7                   | pregnancy specific beta-1-glycoprotein 7 (gene/pseudogene)                                                                                           |
| 1569700_s_at | -4.13 | 0.024975 | 0.811585 | AK7                    | adenylate kinase 7                                                                                                                                   |
| 227806_at    | -2.39 | 0.025053 | 0.811585 | C16orf74               | chromosome 16 open reading frame 74                                                                                                                  |
| 239570_at    | -3.27 | 0.025083 | 0.811585 | RAB1A                  | RAB1A, member RAS oncogene family                                                                                                                    |
| 243354_at    | -2.27 | 0.025088 | 0.811585 | HYDIN; HYDIN2; L       | HYDIN, axonemal central pair apparatus protein; HYDIN2, axonemal central pair apparatus protein (pseudogene); hydrocephalus-inducing protein homolog |

|             |        |          |          |              |                                                                            |
|-------------|--------|----------|----------|--------------|----------------------------------------------------------------------------|
| 244104_at   | -3.4   | 0.025127 | 0.811585 | MGAT3        | mannosyl (beta-1,4-)-glycoprotein beta-1,4-N-acetylglucosaminyltransferase |
| 1555939_at  | -10.99 | 0.025129 | 0.811585 | LOC101928001 | uncharacterized LOC101928001                                               |
| 244085_at   | -2.07  | 0.025133 | 0.811585 | ZNF653       | zinc finger protein 653                                                    |
| 243419_at   | -3.95  | 0.025141 | 0.811585 | LOC654342    | lymphocyte-specific protein 1 pseudogene                                   |
| 221390_s_at | -2.12  | 0.025153 | 0.811585 | ASB12; MTMR8 | ankyrin repeat and SOCS box containing 12; myotubularin related protein 8  |
| 216895_at   | -2.68  | 0.025161 | 0.811585 | GABRG3       | gamma-aminobutyric acid (GABA) A receptor, gamma 3                         |
| 241028_at   | -3.25  | 0.02521  | 0.811585 | RPGRIP1L     | RPGRIP1-like                                                               |
| 1570127_at  | -2.73  | 0.025213 | 0.811585 | LOC101929144 | uncharacterized LOC101929144                                               |
| 204126_s_at | -3.05  | 0.025235 | 0.811585 | CDC45        | cell division cycle 45                                                     |
| 1557591_at  | -3.16  | 0.025255 | 0.811585 | LOC283038    | uncharacterized LOC283038                                                  |
| 233804_at   | -15.78 | 0.025267 | 0.811585 | LINC00544    | long intergenic non-protein coding RNA 544                                 |
| 210451_at   | -2.6   | 0.025341 | 0.811585 | PKLR         | pyruvate kinase, liver and RBC                                             |
| 1561555_at  | -10.57 | 0.02536  | 0.811585 | LINC00970    | long intergenic non-protein coding RNA 970                                 |
| 1563098_at  | -3.15  | 0.025366 | 0.811585 | IGFN1        | immunoglobulin-like and fibronectin type III domain containing 1           |

|              |        |          |          |           |                                                          |
|--------------|--------|----------|----------|-----------|----------------------------------------------------------|
| 1569332_at   | -5.52  | 0.025378 | 0.811585 | LINC00488 | long intergenic non-protein coding RNA 488               |
| 240763_at    | -2.85  | 0.025492 | 0.811585 |           |                                                          |
| 1567284_at   | -2.86  | 0.025529 | 0.811585 | OR1J4     | olfactory receptor, family 1, subfamily J, member 4      |
| 216223_at    | -3.26  | 0.025545 | 0.811585 | CPN2      | carboxypeptidase N, polypeptide 2                        |
| 1553989_a_at | -2.39  | 0.025548 | 0.811585 | ATP6V1C2  | ATPase, H+ transporting, lysosomal 42kDa, V1 subunit C2  |
| 231268_at    | -2.94  | 0.025586 | 0.811585 | MYBL1     | v-myb avian myeloblastosis viral oncogene homolog-like 1 |
| 203423_at    | 2.18   | 0.025636 | 0.811585 | RBP1      | retinol binding protein 1, cellular                      |
| 242991_at    | -4.17  | 0.025638 | 0.811585 | TJP2      | tight junction protein 2                                 |
| 207197_at    | -10.58 | 0.025648 | 0.811585 | ZIC3      | Zic family member 3                                      |
| 206786_at    | 4.58   | 0.025677 | 0.811585 | HTN3      | histatin 3                                               |
| 239010_at    | 3.08   | 0.025699 | 0.811585 | DUXAP10   | double homeobox A pseudogene 10                          |
| 216512_s_at  | -2.02  | 0.025699 | 0.811585 | DCT       | dopachrome tautomerase                                   |
| 243763_x_at  | -4.86  | 0.025713 | 0.811585 |           |                                                          |
| 1557550_at   | -2.62  | 0.02576  | 0.811585 | LINC00906 | long intergenic non-protein coding RNA 906               |
| 231417_at    | 9.3    | 0.025769 | 0.811585 |           |                                                          |
| 235986_at    | -3.17  | 0.025801 | 0.811585 |           |                                                          |
| 203924_at    | -2.58  | 0.025803 | 0.811585 | GSTA1     | glutathione S-transferase alpha 1                        |

|             |       |          |          |                  |                                                                                                     |
|-------------|-------|----------|----------|------------------|-----------------------------------------------------------------------------------------------------|
| 216139_s_at | -5.29 | 0.025812 | 0.811585 | MAPK8IP3         | mitogen-activated protein kinase 8 interacting protein 3                                            |
| 1562501_at  | -2.46 | 0.025838 | 0.811585 | LOC255177        | uncharacterized LOC255177                                                                           |
| 1556815_at  | -3.54 | 0.025863 | 0.811585 |                  |                                                                                                     |
| 234377_at   | -2.8  | 0.025872 | 0.811585 | IL23A; TCRBV6S2A | interleukin 23, alpha subunit p19;<br>SubName: Full=V_segment translation product; Flags: Fragment; |
| 1553077_at  | -2.25 | 0.025953 | 0.811585 | SDR9C7           | short chain dehydrogenase/reductase family 9C, member 7                                             |
| 216647_at   | -2.48 | 0.025962 | 0.811585 | TCF3             | transcription factor 3                                                                              |
| 1561210_at  | -2.99 | 0.025998 | 0.811585 | LOC101928539     | uncharacterized LOC101928539                                                                        |
| 240720_at   | -4.41 | 0.026008 | 0.811585 |                  |                                                                                                     |
| 235383_at   | -3.29 | 0.026009 | 0.811585 | MYO7B            | myosin VIIB                                                                                         |
| 205994_at   | -2.17 | 0.026026 | 0.811585 | ELK4             | ELK4, ETS-domain protein (SRF accessory protein 1)                                                  |
| 207449_s_at | -3.18 | 0.026035 | 0.811585 | POFUT2           | protein O-fucosyltransferase 2                                                                      |
| 234463_at   | -3.97 | 0.026101 | 0.811585 |                  |                                                                                                     |
| 1570008_at  | -2.06 | 0.026126 | 0.811585 | GNN              | Grp94 neighboring nucleotidase pseudogene                                                           |
| 240575_at   | -3.19 | 0.026129 | 0.811585 |                  |                                                                                                     |
| 231642_at   | -2.52 | 0.026137 | 0.811585 | C6orf201         | chromosome 6 open reading frame 201                                                                 |

|              |        |          |          |              |                                              |
|--------------|--------|----------|----------|--------------|----------------------------------------------|
| 239959_x_at  | -3.39  | 0.026203 | 0.811585 |              |                                              |
| 236828_at    | -3.28  | 0.026288 | 0.811585 |              |                                              |
| 233453_at    | -2.54  | 0.026328 | 0.811585 |              |                                              |
| 230756_at    | -3.57  | 0.02636  | 0.811585 | ZNF683       | zinc finger protein 683                      |
| 242954_at    | -2.09  | 0.026374 | 0.811585 | LOC101059948 | uncharacterized LOC101059948                 |
| 1564158_a_at | 7.8    | 0.026389 | 0.811585 | VAC14-AS1    | VAC14 antisense RNA 1                        |
| 203271_s_at  | 3.04   | 0.026391 | 0.811585 | UNC119       | unc-119 homolog (C. elegans)                 |
| 217003_s_at  | -6.75  | 0.026408 | 0.811585 | ADAM5        | ADAM metallopeptidase domain 5, pseudogene   |
| 243666_at    | 5.34   | 0.026411 | 0.811585 | CELF4        | CUGBP, Elav-like family member 4             |
| 236085_at    | 5.32   | 0.026433 | 0.811585 | CAPSL        | calcyphosine-like                            |
| 206146_s_at  | -10.76 | 0.026473 | 0.811585 | RHAG         | Rh-associated glycoprotein                   |
| 240196_at    | -2.67  | 0.026568 | 0.811585 |              |                                              |
| 207138_at    | -3.09  | 0.02665  | 0.811585 | PHF2         | PHD finger protein 2                         |
| 238111_at    | -2.23  | 0.026687 | 0.811585 | SDCCAG3      | serologically defined colon cancer antigen 3 |
| 232755_at    | 3.59   | 0.026775 | 0.811585 | UBE2G2       | ubiquitin-conjugating enzyme E2G 2           |
| 1557862_at   | -4.1   | 0.026814 | 0.811585 | LOC654841    | uncharacterized LOC654841                    |
| 228651_at    | -2.35  | 0.026906 | 0.811585 | VWA1         | von Willebrand factor A domain containing 1  |

|              |       |          |          |                |                                                                               |
|--------------|-------|----------|----------|----------------|-------------------------------------------------------------------------------|
| 1558009_at   | -6.63 | 0.026923 | 0.811585 | SLC1A2         | solute carrier family 1 (glial high affinity glutamate transporter), member 2 |
| 1557565_a_at | -4.17 | 0.026939 | 0.811585 | ALKBH3-AS1     | ALKBH3 antisense RNA 1                                                        |
| 235403_at    | -3.86 | 0.02695  | 0.811585 | RP11-108K3.2   |                                                                               |
| 221317_x_at  | 7.18  | 0.026967 | 0.811585 | PCDHB6         | protocadherin beta 6                                                          |
| 220976_s_at  | -2.18 | 0.027    | 0.811585 | KRTAP1-1       | keratin associated protein 1-1                                                |
| 222078_at    | -3.01 | 0.027038 | 0.811585 | PKLR           | pyruvate kinase, liver and RBC                                                |
| 240041_at    | -5.34 | 0.027108 | 0.811585 | PTCHD1         | patched domain containing 1                                                   |
| 230992_at    | -2.39 | 0.027125 | 0.811585 | BTNL9          | butyrophilin-like 9                                                           |
| 233460_at    | -7.71 | 0.027188 | 0.811585 |                |                                                                               |
| 1562926_at   | 6.13  | 0.027221 | 0.811585 |                |                                                                               |
| 1556294_at   | -2.41 | 0.027236 | 0.811585 | FXVD2          | FXVD domain containing ion transport regulator 2                              |
| 1554348_s_at | -2.49 | 0.02725  | 0.811585 | CDKN2AIPNL     | CDKN2A interacting protein N-terminal like                                    |
| 211846_s_at  | -2.28 | 0.027253 | 0.811585 | PVRL1          | poliovirus receptor-related 1 (herpesvirus entry mediator C)                  |
| 242634_at    | -3.62 | 0.027257 | 0.811585 | GATAD1         | GATA zinc finger domain containing 1                                          |
| 237215_s_at  | -4.55 | 0.02736  | 0.811585 | TFRC           | transferrin receptor                                                          |
| 234633_at    | -3.07 | 0.027366 | 0.811585 | KRTAP4-11      | keratin associated protein 4-11                                               |
| 208312_s_at  | -3.21 | 0.027387 | 0.811585 | PRAMEF1; PRAME | PRAME family member 1; PRAME family member 2                                  |

|              |       |          |          |                     |                                                            |
|--------------|-------|----------|----------|---------------------|------------------------------------------------------------|
| 237658_at    | -7.95 | 0.027392 | 0.811585 |                     |                                                            |
| 1561502_x_at | -2.03 | 0.027413 | 0.811585 | CTU2                | cytosolic thiouridylase subunit 2 homolog (S. pombe)       |
| 244503_at    | -3.58 | 0.027416 | 0.811585 |                     |                                                            |
| 207562_at    | -5.8  | 0.027527 | 0.811585 | DGKQ                | diacylglycerol kinase, theta 110kDa                        |
| 200974_at    | 2.09  | 0.027591 | 0.811585 | ACTA2               | actin, alpha 2, smooth muscle, aorta                       |
| 243198_at    | 4.61  | 0.027604 | 0.811585 | TEX9                | testis expressed 9                                         |
| 202831_at    | -2.46 | 0.027641 | 0.811585 | GPX2                | glutathione peroxidase 2 (gastrointestinal)                |
| 1563477_at   | -2.66 | 0.027689 | 0.811585 |                     |                                                            |
| 1563950_at   | -6.91 | 0.027709 | 0.811585 |                     |                                                            |
| 230698_at    | -5.38 | 0.02771  | 0.811585 | CALN1               | calneuron 1                                                |
| 233805_at    | 7.14  | 0.027729 | 0.811585 |                     |                                                            |
| 215396_at    | -8.51 | 0.027773 | 0.811585 | GPR98               | G protein-coupled receptor 98                              |
| 239422_at    | -2.3  | 0.027773 | 0.811585 | GPC2                | glypican 2                                                 |
| 239122_at    | -2.08 | 0.027779 | 0.811585 |                     |                                                            |
| 1556046_a_at | -2.91 | 0.027832 | 0.811585 | LINC00599; MIR12599 | long intergenic non-protein coding RNA 599; microRNA 124-1 |
| 237893_at    | -3.12 | 0.027845 | 0.811585 |                     |                                                            |
| 1565788_at   | -6.28 | 0.027852 | 0.811585 |                     |                                                            |
| 228854_at    | -2.48 | 0.027873 | 0.811585 |                     |                                                            |
| 1555251_a_at | -4.75 | 0.027918 | 0.811585 | OTOF                | otoferlin                                                  |

|              |       |          |          |               |                                                               |
|--------------|-------|----------|----------|---------------|---------------------------------------------------------------|
| 240729_at    | -3.17 | 0.027941 | 0.811585 | ERIC6         | glutamate-rich 6                                              |
| 214300_s_at  | -2.65 | 0.027975 | 0.811585 | TOP3A         | topoisomerase (DNA) III alpha                                 |
| 233144_s_at  | -2.03 | 0.028006 | 0.811585 | RASAL1        | RAS protein activator like 1 (GAP1 like)                      |
| 234598_at    | -2.54 | 0.028008 | 0.811585 |               |                                                               |
| 240381_at    | -2.23 | 0.028036 | 0.811585 |               |                                                               |
| 1569510_at   | -7.83 | 0.028161 | 0.811585 |               |                                                               |
| 215699_x_at  | -3.23 | 0.028162 | 0.811585 | SFI1          | Sfi1 homolog, spindle assembly associated (yeast)             |
| 1565801_at   | -6.38 | 0.02817  | 0.811585 |               |                                                               |
| 209016_s_at  | 19.13 | 0.028233 | 0.811585 | KRT7          | keratin 7                                                     |
| 1565729_at   | -6.9  | 0.02827  | 0.811585 | RP13-436F16.1 |                                                               |
| 1556247_a_at | -3.01 | 0.028347 | 0.811585 | LOC100506271  | uncharacterized LOC100506271                                  |
| 242929_at    | -3.63 | 0.028381 | 0.811585 |               |                                                               |
| 207817_at    | -5.03 | 0.028398 | 0.811585 | IFNW1         | interferon, omega 1                                           |
| 243095_at    | -2.1  | 0.028487 | 0.811585 | RP11-109M19.1 |                                                               |
| 1563115_at   | -5.37 | 0.02854  | 0.811585 | BC039673      | Homo sapiens, clone IMAGE:5170855, mRNA.                      |
| 230767_at    | -2.9  | 0.028584 | 0.811585 | RP11-416N2.4  |                                                               |
| 207158_at    | -4.69 | 0.028653 | 0.811585 | APOBEC1       | apolipoprotein B mRNA editing enzyme, catalytic polypeptide 1 |
| 230134_s_at  | 3.16  | 0.028733 | 0.811585 | RC3H2         | ring finger and CCCH-type domains 2                           |
| 1559169_at   | -2.07 | 0.02877  | 0.811585 | RP1-187B23.1  |                                                               |

|              |       |          |          |               |                                                                   |
|--------------|-------|----------|----------|---------------|-------------------------------------------------------------------|
| 203982_s_at  | -2.19 | 0.028859 | 0.811585 | ABCD4         | ATP-binding cassette, sub-family D (ALD), member 4                |
| 240860_at    | -3.77 | 0.028888 | 0.811585 | RP11-354I10.1 |                                                                   |
| 1559754_at   | -3.01 | 0.028948 | 0.811585 | LTB           | lymphotoxin beta (TNF superfamily, member 3)                      |
| 217316_at    | -3.52 | 0.028988 | 0.811585 | OR7A10        | olfactory receptor, family 7, subfamily A, member 10              |
| 1565666_s_at | -6.83 | 0.029011 | 0.811585 | MUC6          | mucin 6, oligomeric mucus/gel-forming                             |
| 231621_at    | -3.59 | 0.029096 | 0.811585 | MPZL1         | myelin protein zero-like 1                                        |
| 240975_x_at  | -2.88 | 0.029151 | 0.811585 |               |                                                                   |
| 237428_at    | -4.24 | 0.029221 | 0.811585 | TEX43         | testis expressed 43                                               |
| 240869_at    | -2.09 | 0.029226 | 0.811585 | KCNB1         | potassium voltage-gated channel, Shab-related subfamily, member 1 |
| 222944_s_at  | -2.37 | 0.029268 | 0.811585 | MAGIX         | MAGI family member, X-linked                                      |
| 1567140_at   | -6.91 | 0.029283 | 0.811585 |               |                                                                   |
| 1557874_at   | -4.11 | 0.029288 | 0.811585 | GRID1-AS1     | GRID1 antisense RNA 1                                             |
| 1565947_a_at | -2.95 | 0.029366 | 0.811585 | CHML          | choroideremia-like (Rab escort protein 2)                         |
| 1553531_at   | -3.57 | 0.029369 | 0.811585 | PCSK6         | proprotein convertase subtilisin/kexin type 6                     |
| 211915_s_at  | -3.09 | 0.029372 | 0.811585 | TUBB7P        | tubulin, beta 7, pseudogene                                       |
| 1553070_a_at | -2.52 | 0.029403 | 0.811585 | MYOZ3         | myozenin 3                                                        |

|              |        |          |          |              |                                                                 |
|--------------|--------|----------|----------|--------------|-----------------------------------------------------------------|
| 1554198_at   | -3.3   | 0.029407 | 0.811585 | SH3YL1       | SH3 and SYLF domain containing 1                                |
| 221772_s_at  | 3.69   | 0.029447 | 0.811585 | PPP2R2D      | protein phosphatase 2, regulatory subunit B, delta              |
| 1569841_x_at | -13.26 | 0.029462 | 0.811585 | LOC101927798 | uncharacterized LOC101927798                                    |
| 236112_at    | -2.28  | 0.029474 | 0.811585 | LINC01096    | long intergenic non-protein coding RNA 1096                     |
| 1562741_at   | -3.12  | 0.029489 | 0.811585 | UBXN4        | UBX domain protein 4                                            |
| 233913_at    | -2.09  | 0.02949  | 0.811585 | WFDC10A      | WAP four-disulfide core domain 10A                              |
| 240055_at    | -3.03  | 0.029524 | 0.811585 |              |                                                                 |
| 1555746_at   | -2.62  | 0.029531 | 0.811585 | CD79B        | CD79b molecule, immunoglobulin-associated beta                  |
| 1570208_at   | -4.94  | 0.029564 | 0.811585 | LINC00907    | long intergenic non-protein coding RNA 907                      |
| 1564897_at   | -2.78  | 0.029607 | 0.811585 | TNR          | tenascin R                                                      |
| 1565581_at   | 2.69   | 0.029683 | 0.811585 |              |                                                                 |
| 238313_at    | -7.17  | 0.029692 | 0.811585 |              |                                                                 |
| 243163_at    | -5.19  | 0.029718 | 0.811585 | HECW1        | HECT, C2 and WW domain containing E3 ubiquitin protein ligase 1 |
| 244608_at    | -4.55  | 0.02973  | 0.811585 | LOC101927081 | uncharacterized LOC101927081                                    |
| 1561062_a_at | 4.14   | 0.029733 | 0.811585 | LOC101928850 | uncharacterized LOC101928850                                    |

|              |        |          |          |                  |                                                                                         |
|--------------|--------|----------|----------|------------------|-----------------------------------------------------------------------------------------|
| 1556371_at   | -5.81  | 0.029747 | 0.811585 | OLIG3            | oligodendrocyte transcription factor 3                                                  |
| 238308_at    | -5.26  | 0.029768 | 0.811585 | RP11-343H5.6     |                                                                                         |
| 239501_at    | -3.41  | 0.029776 | 0.811585 |                  |                                                                                         |
| 241880_x_at  | -9.46  | 0.029857 | 0.811585 |                  |                                                                                         |
| 231648_at    | -3.44  | 0.029858 | 0.811585 |                  |                                                                                         |
| 221322_at    | -2.94  | 0.029986 | 0.811585 | NPVF             | neuropeptide VF precursor                                                               |
| 232951_at    | -5.28  | 0.029999 | 0.811585 |                  |                                                                                         |
| 243936_x_at  | -10.18 | 0.030091 | 0.811585 |                  |                                                                                         |
| 221714_s_at  | -6     | 0.030121 | 0.811585 | RRN3P1           | RNA polymerase I transcription factor homolog ( <i>S. cerevisiae</i> ) pseudogene 1     |
| 216659_at    | -2.67  | 0.030137 | 0.811585 | LOC1720          | dihydrofolate reductase pseudogene                                                      |
| 242402_x_at  | -8.65  | 0.030148 | 0.811585 | ARAP2; LOC101928 | ArfGAP with RhoGAP domain, ankyrin repeat and PH domain 2; uncharacterized LOC101928667 |
| 1563389_at   | -3.21  | 0.030155 | 0.811585 | LOC101927761     | uncharacterized LOC101927761                                                            |
| 234619_at    | -6.2   | 0.030193 | 0.811585 |                  |                                                                                         |
| 234293_x_at  | -2.61  | 0.030338 | 0.811585 | RP5-1061H20.3    |                                                                                         |
| 1557908_at   | -2.38  | 0.030351 | 0.811585 |                  |                                                                                         |
| 221793_at    | -5.88  | 0.030369 | 0.811585 | DOCK6            | dedicator of cytokinesis 6                                                              |
| 1553592_x_at | -2.54  | 0.030399 | 0.811585 | BCRP3            | breakpoint cluster region pseudogene 3                                                  |

|              |       |          |          |               |                                                                     |
|--------------|-------|----------|----------|---------------|---------------------------------------------------------------------|
| 244178_at    | -4.36 | 0.030461 | 0.811585 | COMMD7        | COMM domain containing 7                                            |
| 1564402_at   | -3.18 | 0.030551 | 0.811585 | LOC146795     | uncharacterized LOC146795                                           |
| 1566673_at   | -2.12 | 0.030575 | 0.811585 |               |                                                                     |
| 241580_at    | -3.14 | 0.030577 | 0.811585 | ZNF518B       | zinc finger protein 518B                                            |
| 201884_at    | -2.14 | 0.030628 | 0.811585 | CEACAM5       | carcinoembryonic antigen-related cell adhesion molecule 5           |
| 1554583_a_at | -4.31 | 0.03065  | 0.811585 | METTL20       | methyltransferase like 20                                           |
| 232763_at    | -4.52 | 0.030665 | 0.811585 | TLN1          | talin 1                                                             |
| 226812_at    | -8.45 | 0.030711 | 0.811585 |               |                                                                     |
| 1552379_at   | -7.28 | 0.030712 | 0.811585 | RDH10         | retinol dehydrogenase 10 (all-trans)                                |
| 231646_at    | -3.29 | 0.030715 | 0.811585 | DPCR1         | diffuse panbronchiolitis critical region 1                          |
| 1561689_at   | -3.74 | 0.030723 | 0.811585 |               |                                                                     |
| 215632_at    | -2.34 | 0.030732 | 0.811585 | NEUROG2       | neurogenin 2                                                        |
| 235178_x_at  | -5.84 | 0.030783 | 0.811585 | ESCO2         | establishment of sister chromatid cohesion N-acetyltransferase 2    |
| 232832_at    | -2.47 | 0.030784 | 0.811585 | DKFZp434J0226 | uncharacterized LOC93429                                            |
| 40284_at     | -3.95 | 0.030833 | 0.811585 | FOXA2         | forkhead box A2                                                     |
| 220879_at    | -2.9  | 0.03084  | 0.811585 |               |                                                                     |
| 210040_at    | -3.15 | 0.030848 | 0.811585 | SLC12A5       | solute carrier family 12 (potassium/chloride transporter), member 5 |

|             |        |          |          |                  |                                                     |
|-------------|--------|----------|----------|------------------|-----------------------------------------------------|
| 1569732_at  | -5.65  | 0.030877 | 0.811585 | BC070118         | Homo sapiens cDNA clone<br>IMAGE:4828221.           |
| 237610_at   | -2.17  | 0.03094  | 0.811585 | LOC101929512     | uncharacterized LOC101929512                        |
| 1559377_at  | -2.3   | 0.031093 | 0.811585 |                  |                                                     |
| 207823_s_at | -2.44  | 0.03111  | 0.811585 | AIF1             | allograft inflammatory factor 1                     |
| 208353_x_at | -2.38  | 0.031119 | 0.811585 | ANK1             | ankyrin 1, erythrocytic                             |
| 1564264_at  | -3.52  | 0.031176 | 0.811585 | RP11-65J3.14     |                                                     |
| 234470_at   | -5.28  | 0.031201 | 0.811585 | SSU72P8          | SSU72 pseudogene 8                                  |
| 240995_at   | -2.1   | 0.031272 | 0.811585 |                  |                                                     |
| 234319_at   | -2.24  | 0.031288 | 0.811585 | STOX2            | storkhead box 2                                     |
| 214461_at   | -3.35  | 0.031307 | 0.811585 | LBP              | lipopolysaccharide binding protein                  |
| 1561707_at  | -12.57 | 0.031365 | 0.811585 | LINC00895        | long intergenic non-protein coding RNA<br>895       |
| 207080_s_at | -7.06  | 0.031392 | 0.811585 | PYY              | peptide YY                                          |
| 232054_at   | 2.36   | 0.031433 | 0.811585 | LOC101926951; PC | uncharacterized LOC101926951;<br>protocadherin 20   |
| 1561353_at  | -2.55  | 0.031462 | 0.811585 | LOC101927690     | uncharacterized LOC101927690                        |
| 1553258_at  | -3.37  | 0.031508 | 0.811585 | FLJ30679         | uncharacterized protein FLJ30679                    |
| 221266_s_at | -2.51  | 0.031525 | 0.811585 | DCSTAMP          | dendrocyte expressed seven<br>transmembrane protein |
| 228350_at   | -2.98  | 0.031533 | 0.811585 | UNC13D           | unc-13 homolog D (C. elegans)                       |
| 1552835_at  | -2.4   | 0.031649 | 0.811585 | DENND1B          | DENN/MADD domain containing 1B                      |

|              |       |          |          |             |                                                               |
|--------------|-------|----------|----------|-------------|---------------------------------------------------------------|
| 1566037_at   | -3.88 | 0.03167  | 0.811585 | DGCR7       | DiGeorge syndrome critical region gene 7                      |
| 244120_at    | -2.89 | 0.03169  | 0.811585 | LOC340178   | uncharacterized LOC340178                                     |
| 1559402_a_at | -4.86 | 0.031693 | 0.811585 | C1orf61     | chromosome 1 open reading frame 61                            |
| 230801_at    | -2.05 | 0.031695 | 0.811585 | RPRD1B      | regulation of nuclear pre-mRNA domain containing 1B           |
| 238991_at    | -2.08 | 0.031718 | 0.811585 | ASB1        | ankyrin repeat and SOCS box containing 1                      |
| 1566748_at   | -2.62 | 0.031721 | 0.811585 |             |                                                               |
| 214509_at    | -6.67 | 0.031749 | 0.811585 | HIST1H3I    | histone cluster 1, H3i                                        |
| 238202_at    | -5.68 | 0.031805 | 0.811585 |             |                                                               |
| 1561101_at   | -6.55 | 0.031822 | 0.811585 | JAKMIP2-AS1 | JAKMIP2 antisense RNA 1                                       |
| 240832_at    | -3.61 | 0.031833 | 0.811585 |             |                                                               |
| 244469_at    | -2.17 | 0.031834 | 0.811585 |             |                                                               |
| 243101_x_at  | -2.56 | 0.03186  | 0.811585 | XKR7        | XK, Kell blood group complex subunit-related family, member 7 |
| 1552715_a_at | -3.89 | 0.031869 | 0.811585 | RXFP1       | relaxin/insulin-like family peptide receptor 1                |
| 236108_at    | -3.25 | 0.031887 | 0.811585 | EPG5        | ectopic P-granules autophagy protein 5 homolog (C. elegans)   |
| 1553448_at   | -2.73 | 0.031887 | 0.811585 | FLJ34503    | uncharacterized FLJ34503                                      |
| 231731_at    | -5.56 | 0.031916 | 0.811585 | OTX2        | orthodenticle homeobox 2                                      |

|              |        |          |          |                  |                                                                                                                                            |
|--------------|--------|----------|----------|------------------|--------------------------------------------------------------------------------------------------------------------------------------------|
| 1560295_at   | -2.34  | 0.031933 | 0.811585 | CYP19A1          | cytochrome P450, family 19, subfamily A, polypeptide 1                                                                                     |
| 206692_at    | -6.09  | 0.032028 | 0.811585 | KCNJ10           | potassium inwardly-rectifying channel, subfamily J, member 10                                                                              |
| 207342_at    | -8.15  | 0.032094 | 0.811585 | CNGB1            | cyclic nucleotide gated channel beta 1                                                                                                     |
| 221037_s_at  | -25.52 | 0.032304 | 0.811585 | SLC25A31         | solute carrier family 25 (mitochondrial carrier; adenine nucleotide translocator), member 31                                               |
| 1553424_at   | -4.24  | 0.032362 | 0.811585 | C12orf40         | chromosome 12 open reading frame 40                                                                                                        |
| 208069_x_at  | -2.14  | 0.032452 | 0.811585 | CSH1; CSHL1; GH1 | chorionic somatomammotropin hormone 1 (placental lactogen); chorionic somatomammotropin hormone-like 1; growth hormone 1; growth hormone 2 |
| 242980_at    | -3.55  | 0.032488 | 0.811585 | COMMD10          | COMM domain containing 10                                                                                                                  |
| 213744_at    | -2.76  | 0.032504 | 0.811585 | ATRNL1           | attractin-like 1                                                                                                                           |
| 215288_at    | 4.65   | 0.032507 | 0.811585 | TRPC2            | transient receptor potential cation channel, subfamily C, member 2, pseudogene                                                             |
| 240887_at    | -3.85  | 0.03256  | 0.811585 | LOC100506470     | uncharacterized LOC100506470                                                                                                               |
| 1556625_a_at | -3.65  | 0.032598 | 0.811585 | RP11-214K3.20    |                                                                                                                                            |

|              |        |          |          |                 |                                                                                                                                                                                                                                                                                           |
|--------------|--------|----------|----------|-----------------|-------------------------------------------------------------------------------------------------------------------------------------------------------------------------------------------------------------------------------------------------------------------------------------------|
| 1556153_s_at | -2.91  | 0.032613 | 0.811585 |                 |                                                                                                                                                                                                                                                                                           |
| 237986_at    | -2.55  | 0.032618 | 0.811585 |                 |                                                                                                                                                                                                                                                                                           |
| 1560877_a_at | -12.24 | 0.032618 | 0.811585 | RP11-21G15.1    |                                                                                                                                                                                                                                                                                           |
| 231514_at    | -2.6   | 0.032655 | 0.811585 | C1orf94         | chromosome 1 open reading frame 94                                                                                                                                                                                                                                                        |
| 211116_at    | -5.82  | 0.032676 | 0.811585 | SLC9A2          | solute carrier family 9, subfamily A (NHE2, cation proton antiporter 2), member 2                                                                                                                                                                                                         |
| 237345_at    | -3.07  | 0.032698 | 0.811585 | RP11-349E4.1    |                                                                                                                                                                                                                                                                                           |
| 221916_at    | -2.41  | 0.032705 | 0.811585 | NEFL            | neurofilament, light polypeptide                                                                                                                                                                                                                                                          |
| 207086_x_at  | -6.86  | 0.032715 | 0.811585 | GAGE1; GAGE12B; | G antigen 1; G antigen 12B; G antigen 12C; G antigen 12D; G antigen 12E; G antigen 12F; G antigen 12G; G antigen 12H; G antigen 12I; G antigen 12J; G antigen 13; G antigen 2A; G antigen 2C; G antigen 2D; G antigen 2E; G antigen 4; G antigen 5; G antigen 6; G antigen 7; G antigen 8 |
| 244184_at    | -5.99  | 0.032755 | 0.811585 |                 |                                                                                                                                                                                                                                                                                           |
| 1564474_at   | -2.8   | 0.032831 | 0.811585 | ZBED3-AS1       | ZBED3 antisense RNA 1                                                                                                                                                                                                                                                                     |
| 214303_x_at  | -2.11  | 0.032839 | 0.811585 | MUC5AC          | mucin 5AC, oligomeric mucus/gel-forming                                                                                                                                                                                                                                                   |

|              |        |          |          |                 |                                                       |
|--------------|--------|----------|----------|-----------------|-------------------------------------------------------|
| 242976_at    | -2.2   | 0.032938 | 0.811585 |                 |                                                       |
| 1564841_at   | -3.25  | 0.032999 | 0.811585 |                 |                                                       |
| 237516_at    | -5.18  | 0.033    | 0.811585 |                 |                                                       |
| 203348_s_at  | 2.22   | 0.03316  | 0.811585 | ETV5            | ets variant 5                                         |
| 1560854_s_at | 2.6    | 0.033202 | 0.811585 | ZNF107          | zinc finger protein 107                               |
| 1554459_s_at | 3.86   | 0.033244 | 0.811585 | CFHR3           | complement factor H-related 3                         |
| 1553912_at   | -4.42  | 0.033354 | 0.811585 | LINC00955       | long intergenic non-protein coding RNA 955            |
| 1559244_at   | -3.84  | 0.033354 | 0.811585 | FMN2            | formin 2                                              |
| 216025_x_at  | -2.32  | 0.033373 | 0.811585 | CYP2C9          | cytochrome P450, family 2, subfamily C, polypeptide 9 |
| 221422_s_at  | -6.12  | 0.033457 | 0.811585 | MIR600; MIR600H | microRNA 600; MIR600 host gene (non-protein coding)   |
| 236890_at    | -3.91  | 0.033531 | 0.811585 | MTG2            | mitochondrial ribosome-associated GTPase 2            |
| 224388_s_at  | -2.53  | 0.033553 | 0.811585 | COL25A1         | collagen, type XXV, alpha 1                           |
| 234191_at    | -2.27  | 0.033585 | 0.811585 | BCL2L14         | BCL2-like 14 (apoptosis facilitator)                  |
| 229526_at    | 6.79   | 0.033639 | 0.811585 | AQP11           | aquaporin 11                                          |
| 1553552_at   | -2.96  | 0.033644 | 0.811585 | TAAR8           | trace amine associated receptor 8                     |
| 233659_at    | -10.93 | 0.033728 | 0.811585 |                 |                                                       |
| 220510_at    | -2.43  | 0.033743 | 0.811585 | RHBG            | Rh family, B glycoprotein (gene/pseudogene)           |

|              |        |          |          |                  |                                                                                        |
|--------------|--------|----------|----------|------------------|----------------------------------------------------------------------------------------|
| 215862_at    | -2.64  | 0.033783 | 0.811585 |                  |                                                                                        |
| 1559372_at   | -3.03  | 0.033803 | 0.811585 | LOC101928043     | uncharacterized LOC101928043                                                           |
| 1556356_at   | -2.89  | 0.033863 | 0.811585 | ERICH1           | glutamate-rich 1                                                                       |
| 241118_at    | -3.73  | 0.033922 | 0.811585 | LINC00462        | long intergenic non-protein coding RNA 462                                             |
| 1555100_at   | -3.36  | 0.033924 | 0.811585 | APLF             | aprataxin and PNKP like factor                                                         |
| 1559792_at   | -4.93  | 0.033931 | 0.811585 |                  |                                                                                        |
| 1555237_at   | -2.07  | 0.033946 | 0.811585 |                  |                                                                                        |
| 201882_x_at  | -3.04  | 0.033952 | 0.811585 | B4GALT1          | UDP-Gal:betaGlcNAc beta 1,4-galactosyltransferase, polypeptide 1                       |
| 232979_at    | -5.2   | 0.033955 | 0.811585 | MIR10A           | microRNA 10a                                                                           |
| 1562414_at   | -11.99 | 0.033977 | 0.811585 | LOC100509814     | uncharacterized LOC100509814                                                           |
| 1562475_at   | -3.99  | 0.033979 | 0.811585 | TEX41            | testis expressed 41 (non-protein coding)                                               |
| 223633_s_at  | -5.86  | 0.034016 | 0.811585 | BC005081; RP11-2 | Homo sapiens brevican, mRNA (cDNA clone IMAGE:3618761), with apparent retained intron. |
| 221300_at    | -2.33  | 0.034053 | 0.811585 | NPAP1            | nuclear pore associated protein 1                                                      |
| 233928_at    | -3.27  | 0.034108 | 0.811585 | LOC101929335     | uncharacterized LOC101929335                                                           |
| 1553465_a_at | -3.29  | 0.03413  | 0.811585 | CES5A            | carboxylesterase 5A                                                                    |
| 214637_at    | -2.84  | 0.034259 | 0.811585 | OSM              | oncostatin M                                                                           |
| 207009_at    | -3.52  | 0.034291 | 0.811585 | PHOX2B           | paired-like homeobox 2b                                                                |
| 238518_x_at  | -2.02  | 0.034305 | 0.811585 | GLYCK            | glycerate kinase                                                                       |

|              |       |          |          |            |                                                                         |
|--------------|-------|----------|----------|------------|-------------------------------------------------------------------------|
| 229274_at    | -2.06 | 0.034319 | 0.811585 | GNAS       | GNAS complex locus                                                      |
| 1558406_a_at | -7.96 | 0.034326 | 0.811585 |            |                                                                         |
| 233897_at    | -2.43 | 0.034337 | 0.811585 | FEZF2      | FEZ family zinc finger 2                                                |
| 221577_x_at  | -2.18 | 0.034357 | 0.811585 | GDF15      | growth differentiation factor 15                                        |
| 228649_at    | -6.77 | 0.034364 | 0.811585 | NOTUM      | notum pectinacetyltransferase homolog<br>(Drosophila)                   |
| 1554259_at   | -2.65 | 0.03438  | 0.811585 | GPSM1      | G-protein signaling modulator 1                                         |
| 220662_s_at  | -2.28 | 0.034419 | 0.811585 | HEYL       | hes-related family bHLH transcription<br>factor with YRPW motif-like    |
| 241510_at    | -8.38 | 0.034436 | 0.811585 | PLSCR2     | phospholipid scramblase 2                                               |
| 214347_s_at  | 3.11  | 0.034535 | 0.811585 | DDC        | dopa decarboxylase (aromatic L-amino<br>acid decarboxylase)             |
| 216762_at    | -2.35 | 0.034551 | 0.811585 |            |                                                                         |
| 1560946_at   | -2.34 | 0.034571 | 0.811585 |            |                                                                         |
| 1557607_at   | -13   | 0.034604 | 0.811585 | LOC284080  | uncharacterized LOC284080                                               |
| 1553412_at   | 2.37  | 0.034624 | 0.811585 | AGBL4      | ATP/GTP binding protein-like 4                                          |
| 1554908_at   | -2.91 | 0.034667 | 0.811585 | HYDIN      | HYDIN, axonemal central pair apparatus<br>protein                       |
| 216426_at    | -2.98 | 0.034682 | 0.811585 | TCEB1P3    | transcription elongation factor B (SIII),<br>polypeptide 1 pseudogene 3 |
| 229607_at    | -3.67 | 0.034737 | 0.811585 | AC005306.3 |                                                                         |

|             |       |          |          |                  |                                                                                 |
|-------------|-------|----------|----------|------------------|---------------------------------------------------------------------------------|
| 216696_s_at | -2.59 | 0.034739 | 0.811585 | PRODH2           | proline dehydrogenase (oxidase) 2                                               |
| 239712_at   | 5.96  | 0.034782 | 0.811585 | CCDC171          | coiled-coil domain containing 171                                               |
| 229150_at   | -2.19 | 0.034826 | 0.811585 |                  |                                                                                 |
| 215674_at   | -4.09 | 0.034829 | 0.811585 |                  |                                                                                 |
| 1554409_at  | -2.16 | 0.034846 | 0.811585 | WBSCR16          | Williams-Beuren syndrome chromosome region 16                                   |
| 239048_at   | -2.44 | 0.03485  | 0.811585 |                  |                                                                                 |
| 206162_x_at | -2.4  | 0.034868 | 0.811585 | SYT5             | synaptotagmin V                                                                 |
| 237350_at   | -2.45 | 0.035    | 0.811585 | TTC36            | tetratricopeptide repeat domain 36                                              |
| 224295_at   | -6.77 | 0.035073 | 0.811585 |                  |                                                                                 |
| 1570007_at  | -2.14 | 0.035094 | 0.811585 | LOC101927933; LR | uncharacterized LOC101927933; leucine rich repeat containing 8 family, member C |
| 230668_at   | -2.34 | 0.035135 | 0.811585 | NKAIN4           | Na <sup>+</sup> /K <sup>+</sup> transporting ATPase interacting 4               |
| 1557606_at  | -9.9  | 0.035139 | 0.811585 | LOC101928002     | uncharacterized LOC101928002                                                    |
| 1555655_at  | -2.84 | 0.035159 | 0.811585 | OR10A4           | olfactory receptor, family 10, subfamily A, member 4                            |
| 208088_s_at | -3.19 | 0.035245 | 0.811585 | CFHR5            | complement factor H-related 5                                                   |
| 1552973_at  | -3.29 | 0.035265 | 0.811585 | WNT9B            | wingless-type MMTV integration site family, member 9B                           |
| 204292_x_at | 3.02  | 0.035322 | 0.811585 | STK11            | serine/threonine kinase 11                                                      |

|              |        |          |          |              |                                                      |
|--------------|--------|----------|----------|--------------|------------------------------------------------------|
| 210433_at    | -2.08  | 0.035323 | 0.811585 | POFUT1       | protein O-fucosyltransferase 1                       |
| 232900_at    | -2.99  | 0.035329 | 0.811585 | HERC2P7      | hect domain and RLD 2 pseudogene 7                   |
| 233902_at    | -4.39  | 0.035333 | 0.811585 | GUCA1C       | guanylate cyclase activator 1C                       |
| 1555628_a_at | 4.89   | 0.035411 | 0.811585 | HAVCR2       | hepatitis A virus cellular receptor 2                |
| 241369_at    | -8.66  | 0.035439 | 0.811585 | LOC101929335 | uncharacterized LOC101929335                         |
| 234918_at    | -3.09  | 0.035447 | 0.811585 | GLTSCR2      | glioma tumor suppressor candidate region gene 2      |
| 240664_at    | -2.47  | 0.035474 | 0.811585 |              |                                                      |
| 219401_at    | 2.08   | 0.035511 | 0.811585 | XYLT2        | xylosyltransferase II                                |
| 203443_at    | -2.42  | 0.035538 | 0.811585 | EML3         | echinoderm microtubule associated protein like 3     |
| 223059_s_at  | 2.46   | 0.035542 | 0.811585 | FAM107B      | family with sequence similarity 107, member B        |
| 231527_at    | -3.29  | 0.035563 | 0.811585 | FLJ36840     | uncharacterized LOC645524                            |
| 236372_at    | -2.41  | 0.03557  | 0.811585 | PANX1        | pannexin 1                                           |
| 243544_at    | -13.28 | 0.035636 | 0.811585 | ADH1B        | alcohol dehydrogenase 1B (class I), beta polypeptide |
| 241990_at    | -7.94  | 0.03573  | 0.811585 | RHOV         | ras homolog family member V                          |
| 215098_at    | -2.56  | 0.035744 | 0.811585 | RXRB         | retinoid X receptor, beta                            |
| 236084_at    | -3.49  | 0.035778 | 0.811585 |              |                                                      |
| 223720_at    | -3.36  | 0.035815 | 0.811585 | SPINK7       | serine peptidase inhibitor, Kazal type 7 (putative)  |

|              |       |          |          |              |                                                   |
|--------------|-------|----------|----------|--------------|---------------------------------------------------|
| 243555_at    | -2.11 | 0.035882 | 0.811585 |              |                                                   |
| 241439_at    | -7.54 | 0.035882 | 0.811585 | LOC101929004 | uncharacterized LOC101929004                      |
| 1555019_at   | -3.68 | 0.035888 | 0.811585 | CDHR1        | cadherin-related family member 1                  |
| 217063_x_at  | -2.03 | 0.035889 | 0.811585 | YME1L1       | YME1-like 1 ATPase                                |
| 1570327_at   | -5.4  | 0.035911 | 0.811585 | C20orf62     | chromosome 20 open reading frame 62               |
| 202885_s_at  | -3.01 | 0.035921 | 0.811585 | PPP2R1B      | protein phosphatase 2, regulatory subunit A, beta |
| 232306_at    | 3.16  | 0.035932 | 0.811585 | CDH26        | cadherin 26                                       |
| 1561010_a_at | -2.46 | 0.035953 | 0.811585 | MAOB         | monoamine oxidase B                               |
| 204922_at    | 2.32  | 0.036063 | 0.811585 | C11orf80     | chromosome 11 open reading frame 80               |
| 216507_at    | -3.12 | 0.036105 | 0.811585 | TAPT1        | transmembrane anterior posterior transformation 1 |
| 238116_at    | 3.25  | 0.036114 | 0.811585 | DYNLRB2      | dynein, light chain, roadblock-type 2             |
| 223778_at    | -5.02 | 0.036138 | 0.811585 | KIF9         | kinesin family member 9                           |
| 227733_at    | -4.21 | 0.036162 | 0.811585 | TMEM63C      | transmembrane protein 63C                         |
| 1558640_a_at | -5.86 | 0.036164 | 0.811585 | GUSBP1       | glucuronidase, beta pseudogene 1                  |
| 1565746_at   | -5.03 | 0.03618  | 0.811585 | IPO5P1       | importin 5 pseudogene 1                           |
| 235951_s_at  | -9.81 | 0.03619  | 0.811585 | ZNF688       | zinc finger protein 688                           |
| 1569670_at   | -2.92 | 0.036202 | 0.811585 | PP12613      | uncharacterized LOC100192379                      |

|              |       |          |          |              |                                                    |
|--------------|-------|----------|----------|--------------|----------------------------------------------------|
| 206863_x_at  | -3.95 | 0.036228 | 0.811585 |              |                                                    |
| 207502_at    | -4.34 | 0.036232 | 0.811585 | GUCA2B       | guanylate cyclase activator 2B (uroguanylin)       |
| 1565742_at   | -8.18 | 0.036326 | 0.811585 |              |                                                    |
| 1553063_at   | 9.6   | 0.036354 | 0.811585 | GPR78        | G protein-coupled receptor 78                      |
| 220540_at    | 3.78  | 0.03638  | 0.811585 | KCNK15       | potassium channel, subfamily K, member 15          |
| 1561202_at   | -2.51 | 0.036417 | 0.811585 |              |                                                    |
| 206971_at    | -3.05 | 0.036425 | 0.811585 | GPR161       | G protein-coupled receptor 161                     |
| 216106_at    | -4.38 | 0.036442 | 0.811585 | LOC145678    | uncharacterized LOC145678                          |
| 230514_s_at  | -3.73 | 0.036546 | 0.811585 | LYZL1; LYZL2 | lysozyme-like 1; lysozyme-like 2                   |
| 1566176_at   | -3.58 | 0.036552 | 0.811585 | CLYBL-AS1    | CLYBL antisense RNA 1                              |
| 1555703_at   | -2.06 | 0.03656  | 0.811585 | ST3GAL3      | ST3 beta-galactoside alpha-2,3-sialyltransferase 3 |
| 231833_at    | -2.48 | 0.036577 | 0.811585 | RBM33        | RNA binding motif protein 33                       |
| 240501_at    | -2.44 | 0.036599 | 0.811585 |              |                                                    |
| 1562353_x_at | 3.85  | 0.036599 | 0.811585 | LOC101928583 | uncharacterized LOC101928583                       |
| 216388_s_at  | 3.97  | 0.03664  | 0.811585 | LTB4R        | leukotriene B4 receptor                            |
| 235720_at    | -2.16 | 0.036647 | 0.811585 | CRIP3        | cysteine-rich protein 3                            |
| 201743_at    | 2.08  | 0.036687 | 0.811585 | CD14         | CD14 molecule                                      |
| 220447_at    | -2.41 | 0.036697 | 0.811585 | HRH3         | histamine receptor H3                              |
| 1561513_at   | -2.93 | 0.036723 | 0.811585 | LOC101927310 | uncharacterized LOC101927310                       |
| 217715_x_at  | -2.67 | 0.036728 | 0.811585 |              |                                                    |
| 1569817_at   | -6.08 | 0.036734 | 0.811585 | LOC100996590 | uncharacterized LOC100996590                       |

|             |       |          |          |                 |                                                                           |
|-------------|-------|----------|----------|-----------------|---------------------------------------------------------------------------|
| 216364_s_at | -3.87 | 0.036735 | 0.811585 | AFF2            | AF4/FMR2 family, member 2                                                 |
| 235978_at   | -2.11 | 0.036791 | 0.811585 | FABP4           | fatty acid binding protein 4, adipocyte                                   |
| 216436_at   | -4.9  | 0.036801 | 0.811585 | PIK3R4          | phosphoinositide-3-kinase, regulatory subunit 4                           |
| 1566543_at  | -4.91 | 0.036811 | 0.811585 |                 |                                                                           |
| 239209_at   | -4.82 | 0.036826 | 0.811585 | AF131215.8      |                                                                           |
| 1556288_at  | -5.02 | 0.036856 | 0.811585 | SMIM21          | small integral membrane protein 21                                        |
| 244707_at   | -2.88 | 0.03692  | 0.811585 | RP11-272D12.1   |                                                                           |
| 220415_at   | -2.93 | 0.036921 | 0.811585 | FPGT-TNNI3K; TN | FPGT-TNNI3K readthrough; TNNI3 interacting kinase                         |
| 237305_at   | -2.17 | 0.036951 | 0.811585 |                 |                                                                           |
| 1560149_at  | -2.02 | 0.036967 | 0.811585 | SLC29A2         | solute carrier family 29 (equilibrative nucleoside transporter), member 2 |
| 241436_at   | 2.99  | 0.036987 | 0.811585 | SCNN1G          | sodium channel, non-voltage-gated 1, gamma subunit                        |
| 207756_at   | -8.25 | 0.037039 | 0.811725 |                 |                                                                           |
| 209940_at   | 2.35  | 0.037138 | 0.812156 | PARP3           | poly (ADP-ribose) polymerase family, member 3                             |
| 236774_at   | -2.18 | 0.037159 | 0.812156 |                 |                                                                           |

|              |        |          |          |              |                                                                                               |
|--------------|--------|----------|----------|--------------|-----------------------------------------------------------------------------------------------|
| 227487_s_at  | 2.49   | 0.037191 | 0.812156 | SERPINE2     | serpin peptidase inhibitor, clade E (nexin, plasminogen activator inhibitor type 1), member 2 |
| 234795_at    | -3.19  | 0.037311 | 0.812156 |              |                                                                                               |
| 203004_s_at  | -2.55  | 0.037394 | 0.812156 | MEF2D        | myocyte enhancer factor 2D                                                                    |
| 204356_at    | -2.8   | 0.037441 | 0.812156 | LIMK1        | LIM domain kinase 1                                                                           |
| 234532_at    | -3.08  | 0.037456 | 0.812156 |              |                                                                                               |
| 220889_s_at  | -7.32  | 0.037495 | 0.812156 | CA10         | carbonic anhydrase X                                                                          |
| 225683_x_at  | -2.43  | 0.037545 | 0.812156 | PHPT1        | phosphohistidine phosphatase 1                                                                |
| 240268_at    | -2.07  | 0.037588 | 0.812156 | LOC440117    | uncharacterized LOC440117                                                                     |
| 243257_at    | -13.68 | 0.037616 | 0.812156 |              |                                                                                               |
| 1555550_at   | -6.31  | 0.037648 | 0.812156 | ZACN         | zinc activated ligand-gated ion channel                                                       |
| 1564697_a_at | -5.53  | 0.037717 | 0.812156 | LINC01144    | long intergenic non-protein coding RNA 1144                                                   |
| 230714_s_at  | -2.53  | 0.037735 | 0.812156 |              |                                                                                               |
| 1554992_at   | -3.05  | 0.037752 | 0.812156 | RASGRF1      | Ras protein-specific guanine nucleotide-releasing factor 1                                    |
| 231362_at    | -2.4   | 0.03778  | 0.812156 |              |                                                                                               |
| 234713_x_at  | -2.13  | 0.037809 | 0.812156 |              |                                                                                               |
| 237642_at    | -2.44  | 0.037868 | 0.812156 | CTBP1-AS2    | CTBP1 antisense RNA 2 (head to head)                                                          |
| 244823_at    | -2.59  | 0.03791  | 0.812156 | LOC100129034 | uncharacterized LOC100129034                                                                  |

|              |        |          |          |                  |                                                                                                              |
|--------------|--------|----------|----------|------------------|--------------------------------------------------------------------------------------------------------------|
| 220744_s_at  | 2.1    | 0.037954 | 0.812156 | IFT122; LOC10192 | intraflagellar transport 122 homolog (Chlamydomonas); intraflagellar transport protein 122 homolog           |
| 231743_at    | 3.75   | 0.037968 | 0.812156 | LOC101929777; W  | uncharacterized LOC101929777; wingless-type MMTV integration site family, member 3                           |
| 231553_s_at  | -2.09  | 0.038039 | 0.812156 | MICAL3           | microtubule associated monooxygenase, calponin and LIM domain containing 3                                   |
| 205328_at    | -2.13  | 0.038043 | 0.812156 | CLDN10           | claudin 10                                                                                                   |
| 241255_at    | -2.35  | 0.038063 | 0.812156 | CTNNA3           | catenin (cadherin-associated protein), alpha 3                                                               |
| 211910_at    | -2.34  | 0.03812  | 0.812156 |                  |                                                                                                              |
| 213978_at    | -4.01  | 0.038181 | 0.812156 | MTSS1L           | metastasis suppressor 1-like                                                                                 |
| 210920_x_at  | -2.03  | 0.038226 | 0.812156 |                  |                                                                                                              |
| 1564356_at   | -3.55  | 0.038299 | 0.812156 | ZNF568           | zinc finger protein 568                                                                                      |
| 206549_at    | -2.28  | 0.038306 | 0.812156 | INSL4            | insulin-like 4 (placenta)                                                                                    |
| 1556876_s_at | -2.21  | 0.038311 | 0.812156 | LOC101930578; TP | uncharacterized LOC101930578; transmembrane phosphoinositide 3-phosphatase and tensin homolog 2 pseudogene 2 |
| 1555718_x_at | -10.63 | 0.038355 | 0.812156 |                  |                                                                                                              |
| 1562558_at   | -2.71  | 0.038403 | 0.812156 | LOC440704        | uncharacterized LOC440704                                                                                    |

|              |       |          |          |              |                                                   |
|--------------|-------|----------|----------|--------------|---------------------------------------------------|
| 1553196_a_at | -2.04 | 0.038445 | 0.812156 | FCRL3        | Fc receptor-like 3                                |
| 201203_s_at  | 4.84  | 0.038484 | 0.812156 | RRBP1        | ribosome binding protein 1                        |
| 1559283_a_at | -2.72 | 0.038546 | 0.812156 | CNPY1        | canopy FGF signaling regulator 1                  |
| 205643_s_at  | -2.47 | 0.038551 | 0.812156 | PPP2R2B      | protein phosphatase 2, regulatory subunit B, beta |
| 1555196_at   | -2.93 | 0.038616 | 0.812156 | LINC00421    | long intergenic non-protein coding RNA 421        |
| 243404_at    | -2.47 | 0.038617 | 0.812156 |              |                                                   |
| 242591_at    | -5    | 0.038692 | 0.812156 | DNAH1        | dynein, axonemal, heavy chain 1                   |
| 237539_at    | -4.04 | 0.0387   | 0.812156 |              |                                                   |
| 1566157_x_at | -2.13 | 0.038752 | 0.812156 |              |                                                   |
| 216703_at    | -2.97 | 0.038757 | 0.812156 |              |                                                   |
| 1564202_at   | -6.26 | 0.038829 | 0.812156 | LOC100131756 | uncharacterized LOC100131756                      |
| 227398_s_at  | -3.26 | 0.038838 | 0.812156 | MIDN         | midnolin                                          |
| 243793_at    | -3.35 | 0.038975 | 0.813039 | AHDC1        | AT hook, DNA binding motif, containing 1          |
| 1557495_at   | -2.47 | 0.039239 | 0.815723 |              |                                                   |
| 223970_at    | -2.75 | 0.039248 | 0.815723 | RETNLB       | resistin like beta                                |
| 236326_at    | -2.01 | 0.039422 | 0.815725 | HDAC7        | histone deacetylase 7                             |
| 206904_at    | 2.51  | 0.03956  | 0.815725 | MATN1        | matrilin 1, cartilage matrix protein              |
| 235823_at    | -2.05 | 0.039608 | 0.815725 | ACSF3        | acyl-CoA synthetase family member 3               |

|              |       |          |          |         |                                                        |
|--------------|-------|----------|----------|---------|--------------------------------------------------------|
| 230718_at    | 2.91  | 0.039609 | 0.815725 | HSF5    | heat shock transcription factor family member 5        |
| 204285_s_at  | 2.14  | 0.039615 | 0.815725 | PMAIP1  | phorbol-12-myristate-13-acetate-induced protein 1      |
| 1562991_at   | -9.76 | 0.039744 | 0.815725 | ZNF292  | zinc finger protein 292                                |
| 1569144_a_at | -7.16 | 0.03975  | 0.815725 | CYSRT1  | cysteine-rich tail protein 1                           |
| 217035_at    | -3.9  | 0.039788 | 0.815725 | SKAP2   | src kinase associated phosphoprotein 2                 |
| 1553893_at   | -2.23 | 0.039859 | 0.815725 | CCDC105 | coiled-coil domain containing 105                      |
| 1562579_at   | -2.49 | 0.039883 | 0.815725 |         |                                                        |
| 232923_at    | 4.66  | 0.039903 | 0.815725 |         |                                                        |
| 219867_at    | 3.23  | 0.039966 | 0.815725 | CHODL   | chondrolectin                                          |
| 208504_x_at  | 3.52  | 0.040012 | 0.815725 | PCDHB11 | protocadherin beta 11                                  |
| 208497_x_at  | -2.74 | 0.040015 | 0.815725 | NEUROG1 | neurogenin 1                                           |
| 239000_at    | -2.47 | 0.04011  | 0.815725 | BRD4    | bromodomain containing 4                               |
| 217295_at    | -4.08 | 0.040148 | 0.815725 | MUC8    | mucin 8                                                |
| 1552898_a_at | 3.28  | 0.040155 | 0.815725 | KCNG3   | potassium voltage-gated channel, subfamily G, member 3 |
| 1563839_at   | -2.65 | 0.040177 | 0.815725 | TBC1D7  | TBC1 domain family, member 7                           |
| 221429_x_at  | -2.67 | 0.040222 | 0.815725 | TEX13A  | testis expressed 13A                                   |
| 210763_x_at  | -3.22 | 0.040225 | 0.815725 | NCR3    | natural cytotoxicity triggering receptor 3             |
| 1564154_at   | -3.55 | 0.040238 | 0.815725 |         |                                                        |

|              |       |          |          |              |                                                               |
|--------------|-------|----------|----------|--------------|---------------------------------------------------------------|
| 205544_s_at  | -2.5  | 0.040262 | 0.815725 | CR2          | complement component (3d/Epstein Barr virus) receptor 2       |
| 234790_at    | -4.13 | 0.040263 | 0.815725 |              |                                                               |
| 1554337_at   | -2.84 | 0.040273 | 0.815725 | FARP2        | FERM, RhoGEF and pleckstrin domain protein 2                  |
| 216586_at    | -2.44 | 0.040288 | 0.815725 |              |                                                               |
| 216936_at    | -3.04 | 0.040464 | 0.815725 |              |                                                               |
| 237149_at    | -3.26 | 0.040578 | 0.815725 |              |                                                               |
| 242331_x_at  | -2.03 | 0.040635 | 0.815725 | LOC642236    | FSDH region gene 1 pseudogene                                 |
| 244350_at    | -4.36 | 0.040644 | 0.815725 | MYO10        | myosin X                                                      |
| 234508_at    | -2.96 | 0.040662 | 0.815725 |              |                                                               |
| 221240_s_at  | -2.04 | 0.040691 | 0.815725 | B3GNT4       | UDP-GlcNAc:betaGal beta-1,3-N-acetylglucosaminyltransferase 4 |
| 240819_at    | -8.04 | 0.04092  | 0.815725 |              |                                                               |
| 231138_at    | 5.76  | 0.040963 | 0.815725 | TRPC5OS      | TRPC5 opposite strand                                         |
| 214380_at    | -6.65 | 0.041004 | 0.815725 | PRPF31       | pre-mRNA processing factor 31                                 |
| 235854_x_at  | 3.33  | 0.041082 | 0.815725 | ROCK1        | Rho-associated, coiled-coil containing protein kinase 1       |
| 1559452_a_at | -2.09 | 0.041128 | 0.815725 |              |                                                               |
| 1553944_at   | -2.13 | 0.041152 | 0.815725 | CTAGE5; MIA2 | CTAGE family, member 5; melanoma inhibitory activity 2        |

|              |       |          |          |         |                                                                    |
|--------------|-------|----------|----------|---------|--------------------------------------------------------------------|
| 244243_at    | -2.19 | 0.041233 | 0.815725 | FAM230B | family with sequence similarity 230, member B (non-protein coding) |
| 236642_at    | -2.12 | 0.041238 | 0.815725 | C5orf63 | chromosome 5 open reading frame 63                                 |
| 238938_at    | -2.42 | 0.041259 | 0.815725 |         |                                                                    |
| 1553067_a_at | -2.58 | 0.041319 | 0.815725 | GNRHR2  | gonadotropin-releasing hormone (type 2) receptor 2, pseudogene     |
| 1554601_at   | -2.39 | 0.041363 | 0.815725 | NKAIN2  | Na <sup>+</sup> /K <sup>+</sup> transporting ATPase interacting 2  |
| 1568513_x_at | -2.75 | 0.041366 | 0.815725 |         |                                                                    |
| 1553593_a_at | -3.82 | 0.041471 | 0.815725 | TAL2    | T-cell acute lymphocytic leukemia 2                                |
| 230847_at    | -2.07 | 0.041478 | 0.815725 | WRNIP1  | Werner helicase interacting protein 1                              |
| 206246_at    | -4.97 | 0.041503 | 0.815725 | PFKFB4  | 6-phosphofructo-2-kinase/fructose-2,6-biphosphatase 4              |
| 239547_at    | -8.03 | 0.041571 | 0.815725 | HS3ST6  | heparan sulfate (glucosamine) 3-O-sulfotransferase 6               |
| 230754_at    | 2.71  | 0.041593 | 0.815725 | ZBTB38  | zinc finger and BTB domain containing 38                           |
| 1557446_x_at | -3.17 | 0.041636 | 0.815725 | TREML3P | triggering receptor expressed on myeloid cells-like 3, pseudogene  |

|              |       |          |          |                 |                                                                              |
|--------------|-------|----------|----------|-----------------|------------------------------------------------------------------------------|
| 1569560_at   | -3.16 | 0.041711 | 0.815725 | HIRA            | histone cell cycle regulator                                                 |
| 1562629_a_at | -4.53 | 0.041937 | 0.815725 | KRT40           | keratin 40                                                                   |
| 1553591_at   | -3.18 | 0.041946 | 0.815725 | BCRP3           | breakpoint cluster region pseudogene 3                                       |
| 234477_at    | -3.87 | 0.041953 | 0.815725 | IGHA1; IGHV4-31 | immunoglobulin heavy constant alpha 1;<br>immunoglobulin heavy variable 4-31 |
| 220866_at    | -6.51 | 0.041968 | 0.815725 | ADAMTS6         | ADAM metallopeptidase with<br>thrombospondin type 1 motif, 6                 |
| 1555224_at   | -3.33 | 0.041975 | 0.815725 | CCDC148-AS1     | CCDC148 antisense RNA 1                                                      |
| 204843_s_at  | 3.5   | 0.042002 | 0.815725 | PRKAR2A         | protein kinase, cAMP-dependent,<br>regulatory, type II, alpha                |
| 229416_at    | -8.52 | 0.042018 | 0.815725 | CLPTM1L         | CLPTM1-like                                                                  |
| 239618_at    | -2.18 | 0.042041 | 0.815725 | SEC16B          | SEC16 homolog B ( <i>S. cerevisiae</i> )                                     |
| 241227_at    | -2.86 | 0.042106 | 0.815725 |                 |                                                                              |
| 1557713_at   | -3.92 | 0.042175 | 0.815725 |                 |                                                                              |
| 1556058_s_at | 2.8   | 0.042178 | 0.815725 | SPEN            | spen family transcriptional repressor                                        |
| 223992_x_at  | 2.24  | 0.042194 | 0.815725 | ZCWPW1          | zinc finger, CW type with PWWP domain<br>1                                   |
| 216549_s_at  | 3.28  | 0.042258 | 0.815725 | TBC1D22B        | TBC1 domain family, member 22B                                               |
| 234928_x_at  | -4.5  | 0.042288 | 0.815725 | RUNX3           | runt-related transcription factor 3                                          |
| 243415_at    | -2.45 | 0.042334 | 0.815725 |                 |                                                                              |

|              |       |          |          |                 |                                                                                                                          |
|--------------|-------|----------|----------|-----------------|--------------------------------------------------------------------------------------------------------------------------|
| 1560018_at   | -5.78 | 0.042348 | 0.815725 | ARPP21          | cAMP-regulated phosphoprotein, 21kDa                                                                                     |
| 241553_at    | -4.69 | 0.042366 | 0.815725 | GSG1            | germ cell associated 1                                                                                                   |
| 228434_at    | -3.15 | 0.042395 | 0.815725 | BTNL9           | butyrophilin-like 9                                                                                                      |
| 237479_at    | 4.03  | 0.042488 | 0.815725 |                 |                                                                                                                          |
| 217382_at    | -2.67 | 0.042494 | 0.815725 | CLIC1P1         | chloride intracellular channel 1<br>pseudogene 1                                                                         |
| 1555794_at   | 3.9   | 0.042515 | 0.815725 | ARL17A; ARL17B; | ADP-ribosylation factor-like 17A; ADP-<br>ribosylation factor-like 17B; ADP-<br>ribosylation factor-like protein 17-like |
| 230601_s_at  | -2.19 | 0.042552 | 0.815725 | LRRC46          | leucine rich repeat containing 46                                                                                        |
| 233670_at    | 13.22 | 0.04257  | 0.815725 |                 |                                                                                                                          |
| 1570537_a_at | -2.62 | 0.042575 | 0.815725 |                 |                                                                                                                          |
| 231224_x_at  | -2.06 | 0.042599 | 0.815725 | PRKAG2          | protein kinase, AMP-activated, gamma 2<br>non-catalytic subunit                                                          |
| 215958_at    | -4.66 | 0.04263  | 0.815725 |                 |                                                                                                                          |
| 1561053_at   | 2.45  | 0.042661 | 0.815725 |                 |                                                                                                                          |
| 244818_at    | -2.02 | 0.04271  | 0.815725 | ZNF780B         | zinc finger protein 780B                                                                                                 |
| 232869_at    | -8.76 | 0.042775 | 0.815725 | SRGAP3          | SLIT-ROBO Rho GTPase activating<br>protein 3                                                                             |
| 229877_at    | 3.09  | 0.042821 | 0.815725 | NEO1            | neogenin 1                                                                                                               |
| 233550_s_at  | -3.97 | 0.042824 | 0.815725 | SLC4A11         | solute carrier family 4, sodium borate<br>transporter, member 11                                                         |

|             |       |          |          |               |                                                                           |
|-------------|-------|----------|----------|---------------|---------------------------------------------------------------------------|
| 209400_at   | -4.38 | 0.042833 | 0.815725 | SLC12A4       | solute carrier family 12<br>(potassium/chloride transporter),<br>member 4 |
| 214243_s_at | 2.05  | 0.04285  | 0.815725 | SERHL; SERHL2 | serine hydrolase-like; serine hydrolase-<br>like 2                        |
| 213751_at   | 2.75  | 0.042858 | 0.815725 | PPP1R37       | protein phosphatase 1, regulatory subunit<br>37                           |
| 202145_at   | 7.25  | 0.042884 | 0.815725 | LY6E          | lymphocyte antigen 6 complex, locus E                                     |
| 224753_at   | 4.78  | 0.042888 | 0.815725 | CDCA5         | cell division cycle associated 5                                          |
| 238364_x_at | 2.44  | 0.042912 | 0.815725 | GLI4          | GLI family zinc finger 4                                                  |
| 239813_at   | -3.01 | 0.042972 | 0.815725 | IQCH          | IQ motif containing H                                                     |
| 204384_at   | 2.09  | 0.043009 | 0.816115 | GOLGA2        | golgin A2                                                                 |
| 234503_at   | -2.26 | 0.043052 | 0.816202 |               |                                                                           |
| 216327_s_at | -2.04 | 0.043062 | 0.816202 | SIGLEC8       | sialic acid binding Ig-like lectin 8                                      |
| 230021_at   | -7.69 | 0.043087 | 0.816202 | TICRR         | TOPBP1-interacting checkpoint and<br>replication regulator                |
| 229122_x_at | -2.32 | 0.043117 | 0.816487 | NPRL3         | nitrogen permease regulator-like 3 (S.<br>cerevisiae)                     |
| 202966_at   | -3.36 | 0.043173 | 0.816642 | CAPN6         | calpain 6                                                                 |
| 242942_at   | -2.4  | 0.04319  | 0.816642 | SLC38A10      | solute carrier family 38, member 10                                       |
| 1555608_at  | -2.57 | 0.043202 | 0.816642 | CAPRN2        | caprin family member 2                                                    |
| 233484_at   | -4.83 | 0.043222 | 0.816642 |               |                                                                           |

|             |        |          |          |             |                                                         |
|-------------|--------|----------|----------|-------------|---------------------------------------------------------|
| 236919_at   | -2.75  | 0.043264 | 0.816642 |             |                                                         |
| 229973_at   | -7.46  | 0.043269 | 0.816642 | ERICH3      | glutamate-rich 3                                        |
| 1567379_at  | -13.27 | 0.043317 | 0.816642 |             |                                                         |
| 241960_at   | -2.28  | 0.043322 | 0.816642 | CSMD1       | CUB and Sushi multiple domains 1                        |
| 235578_at   | -6.72  | 0.043377 | 0.816642 | ABCC9       | ATP-binding cassette, sub-family C (CFTR/MRP), member 9 |
| 227023_at   | -3.14  | 0.043465 | 0.816642 | GLI4; ZFP41 | GLI family zinc finger 4; ZFP41 zinc finger protein     |
| 229266_at   | -2.33  | 0.043548 | 0.816642 | SHISA6      | shisa family member 6                                   |
| 236690_at   | -2.41  | 0.043604 | 0.816642 | RHBDD1      | rhomboid domain containing 1                            |
| 1562079_at  | -2.52  | 0.043649 | 0.816642 |             |                                                         |
| 242324_x_at | -2.63  | 0.043729 | 0.817471 | CCBE1       | collagen and calcium binding EGF domains 1              |
| 244844_at   | -2.34  | 0.043765 | 0.817471 |             |                                                         |
| 237558_at   | -5.64  | 0.043766 | 0.817471 |             |                                                         |
| 220658_s_at | -4.2   | 0.04378  | 0.817471 | ARNTL2      | aryl hydrocarbon receptor nuclear translocator-like 2   |
| 210722_at   | -3.91  | 0.043783 | 0.817471 | PNLIPRP1    | pancreatic lipase-related protein 1                     |
| 230627_at   | -2.64  | 0.043864 | 0.817617 |             |                                                         |
| 210569_s_at | -2.94  | 0.043929 | 0.817617 | SIGLEC9     | sialic acid binding Ig-like lectin 9                    |
| 1556956_at  | -2.44  | 0.04402  | 0.817617 | KCP         | kielin/chordin-like protein                             |
| 222966_at   | 4.72   | 0.044044 | 0.817617 | TLK1        | tousled-like kinase 1                                   |

|              |       |          |          |                 |                                                                       |
|--------------|-------|----------|----------|-----------------|-----------------------------------------------------------------------|
| 221720_s_at  | -2.92 | 0.044048 | 0.817617 |                 |                                                                       |
| 226226_at    | -2.18 | 0.044131 | 0.817617 | TMEM45B         | transmembrane protein 45B                                             |
| 231799_at    | -4.01 | 0.044223 | 0.817617 | TANC2           | tetratricopeptide repeat, ankyrin repeat and coiled-coil containing 2 |
| 1566978_at   | -3.3  | 0.044233 | 0.817617 |                 |                                                                       |
| 1562637_at   | -5.48 | 0.044285 | 0.817617 | SAMD12          | sterile alpha motif domain containing 12                              |
| 236852_at    | -2.55 | 0.044291 | 0.817617 | FBXO43          | F-box protein 43                                                      |
| 1563856_at   | 4.77  | 0.0443   | 0.817617 |                 |                                                                       |
| 214387_x_at  | -2.15 | 0.044305 | 0.817617 | SFTPC           | surfactant protein C                                                  |
| 216635_at    | -2.78 | 0.044523 | 0.817617 |                 |                                                                       |
| 217183_at    | -3.06 | 0.044524 | 0.817617 | SPC24           | SPC24, NDC80 kinetochore complex component                            |
| 239431_at    | 2.1   | 0.04455  | 0.817617 | TICAM2; TMED7-T | toll-like receptor adaptor molecule 2; TMED7-TICAM2 readthrough       |
| 1557864_x_at | -2.14 | 0.044569 | 0.817617 | LOC101928388    | uncharacterized LOC101928388                                          |
| 220389_at    | 3.03  | 0.044663 | 0.817617 | CCDC81          | coiled-coil domain containing 81                                      |
| 1562788_at   | -2.53 | 0.044699 | 0.817617 | LINC01342       | long intergenic non-protein coding RNA 1342                           |
| 214234_s_at  | -2.38 | 0.04476  | 0.817617 | CYP3A5          | cytochrome P450, family 3, subfamily A, polypeptide 5                 |
| 205906_at    | -2.91 | 0.044816 | 0.817617 | FOXJ1           | forkhead box J1                                                       |

|             |        |          |          |          |                                                                  |
|-------------|--------|----------|----------|----------|------------------------------------------------------------------|
| 1562894_at  | -2.06  | 0.04486  | 0.817617 |          |                                                                  |
| 229403_at   | -4.14  | 0.044885 | 0.817617 | B4GALT1  | UDP-Gal:betaGlcNAc beta 1,4-galactosyltransferase, polypeptide 1 |
| 221520_s_at | -2.19  | 0.044895 | 0.817617 | CDCA8    | cell division cycle associated 8                                 |
| 207211_at   | -3.65  | 0.044931 | 0.817617 | USP2     | ubiquitin specific peptidase 2                                   |
| 239299_at   | -2.51  | 0.044978 | 0.817617 | DDI1     | DNA-damage inducible 1 homolog 1 (S. cerevisiae)                 |
| 215715_at   | -2.31  | 0.045031 | 0.817617 | SLC6A2   | solute carrier family 6 (neurotransmitter transporter), member 2 |
| 215226_at   | -2.76  | 0.045037 | 0.817617 | EXPH5    | exophilin 5                                                      |
| 221445_at   | -12.03 | 0.045095 | 0.817617 | OR1A2    | olfactory receptor, family 1, subfamily A, member 2              |
| 244781_x_at | 3.83   | 0.045108 | 0.817617 |          |                                                                  |
| 233478_at   | -2.31  | 0.045164 | 0.817617 |          |                                                                  |
| 1555038_at  | 2.65   | 0.045365 | 0.817617 | EPB41L4A | erythrocyte membrane protein band 4.1 like 4A                    |
| 237545_at   | -2.21  | 0.045418 | 0.817617 |          |                                                                  |
| 205828_at   | -4.29  | 0.045516 | 0.817617 | MMP3     | matrix metalloproteinase 3 (stromelysin 1, progelatinase)        |
| 235234_at   | 2.48   | 0.045518 | 0.817617 | PATL1    | protein associated with topoisomerase II homolog 1 (yeast)       |

|              |        |          |          |              |                                                        |
|--------------|--------|----------|----------|--------------|--------------------------------------------------------|
| 206048_at    | -2.28  | 0.045539 | 0.817617 | OVOL2        | ovo-like zinc finger 2                                 |
| 217091_at    | 2.97   | 0.045543 | 0.817617 |              |                                                        |
| 208458_at    | -2.28  | 0.045552 | 0.817617 | SCNN1D       | sodium channel, non-voltage-gated 1, delta subunit     |
| 243043_at    | -2.55  | 0.045555 | 0.817617 |              |                                                        |
| 229284_at    | -9.73  | 0.045601 | 0.817617 | MAT2B        | methionine adenosyltransferase II, beta                |
| 234198_at    | -2.46  | 0.045655 | 0.817617 | PROM2        | prominin 2                                             |
| 242799_at    | -3.55  | 0.045665 | 0.817617 |              |                                                        |
| 1559292_s_at | -2.92  | 0.045674 | 0.817617 | LINC00032    | long intergenic non-protein coding RNA 32              |
| 231614_at    | -3.93  | 0.045683 | 0.817617 | NOVA1        | neuro-oncological ventral antigen 1                    |
| 240079_at    | -2.97  | 0.045684 | 0.817617 | ZNF81        | zinc finger protein 81                                 |
| 243191_at    | -4.29  | 0.045705 | 0.817617 |              |                                                        |
| 1557664_at   | -2.48  | 0.045736 | 0.817617 | LOC101929114 | uncharacterized LOC101929114                           |
| 240193_at    | -2.93  | 0.045754 | 0.817617 |              |                                                        |
| 241647_x_at  | -5.93  | 0.045774 | 0.817617 |              |                                                        |
| 211778_s_at  | -2.12  | 0.045786 | 0.817617 | OVOL2        | ovo-like zinc finger 2                                 |
| 1563367_at   | 2.38   | 0.045803 | 0.817617 | MAPT-AS1     | MAPT antisense RNA 1                                   |
| 1555132_at   | -3.21  | 0.045883 | 0.817617 | LOC101928787 | uncharacterized LOC101928787                           |
| 208126_s_at  | -2.25  | 0.045886 | 0.817617 | CYP2C18      | cytochrome P450, family 2, subfamily C, polypeptide 18 |
| 234382_x_at  | -11.47 | 0.045927 | 0.817617 |              |                                                        |

|             |        |          |          |                |                                                                     |
|-------------|--------|----------|----------|----------------|---------------------------------------------------------------------|
| 1552772_at  | -4.64  | 0.045968 | 0.817617 | CLEC4D         | C-type lectin domain family 4, member D                             |
| 206425_s_at | -2.14  | 0.045975 | 0.817617 | TRPC3          | transient receptor potential cation channel, subfamily C, member 3  |
| 219369_s_at | -3.07  | 0.046086 | 0.817617 | OTUB2          | OTU deubiquitinase, ubiquitin aldehyde binding 2                    |
| 223906_s_at | -2.23  | 0.046135 | 0.817617 | TEX101         | testis expressed 101                                                |
| 240241_at   | 3.13   | 0.046155 | 0.817617 |                |                                                                     |
| 244319_at   | -4.18  | 0.046179 | 0.817617 |                |                                                                     |
| 234724_x_at | 2.6    | 0.046194 | 0.817617 | PCDHB18        | protocadherin beta 18 pseudogene                                    |
| 241909_at   | -11.39 | 0.046202 | 0.817617 | TNKS2          | tankyrase, TRF1-interacting ankyrin-related ADP-ribose polymerase 2 |
| 241964_at   | -5.22  | 0.046207 | 0.817617 | ZNF865         | zinc finger protein 865                                             |
| 237505_at   | -8.24  | 0.046214 | 0.817617 |                |                                                                     |
| 221252_s_at | -2.91  | 0.046215 | 0.817617 | GSG1           | germ cell associated 1                                              |
| 230487_at   | -3.78  | 0.046216 | 0.817617 | C6orf99        | chromosome 6 open reading frame 99                                  |
| 229552_at   | -3.48  | 0.04622  | 0.817617 | HRK; LOC283454 | harakiri, BCL2 interacting protein; uncharacterized LOC283454       |
| 205484_at   | -2.59  | 0.046266 | 0.817617 | SIT1           | signaling threshold regulating transmembrane adaptor 1              |

|              |       |          |          |                  |                                          |
|--------------|-------|----------|----------|------------------|------------------------------------------|
| 226654_at    | -2.82 | 0.046275 | 0.817617 | MUC12            | mucin 12, cell surface associated        |
| 230260_s_at  | -4.79 | 0.046325 | 0.817617 |                  |                                          |
| 1557456_a_at | -5.5  | 0.046448 | 0.817617 |                  |                                          |
| 205057_s_at  | 3.3   | 0.046501 | 0.817617 | IDUA             | iduronidase, alpha-L-                    |
| 214418_at    | -3.43 | 0.046568 | 0.817617 | CT62             | cancer/testis antigen 62                 |
| 1556940_at   | -2.95 | 0.046574 | 0.817617 | LOC283484        | uncharacterized LOC283484                |
| 228923_at    | 3.2   | 0.04666  | 0.817617 | S100A6           | S100 calcium binding protein A6          |
| 1552457_a_at | -3.34 | 0.046663 | 0.817617 | ADAMTSL1         | ADAMTS-like 1                            |
| 1564292_at   | -2.18 | 0.046706 | 0.817617 |                  |                                          |
| 1563074_at   | -2.91 | 0.046757 | 0.817617 | LOC255654        | uncharacterized LOC255654                |
| 220850_at    | -6.97 | 0.04676  | 0.817617 | MORC1            | MORC family CW-type zinc finger 1        |
| 234572_at    | -5.23 | 0.046779 | 0.817617 |                  |                                          |
| 1552271_at   | -2.41 | 0.046848 | 0.817617 | PRR22            | proline rich 22                          |
| 206516_at    | -3.02 | 0.046922 | 0.817617 | AMH; MIR4321     | anti-Mullerian hormone; microRNA 4321    |
| 1564706_s_at | 7.89  | 0.046934 | 0.817617 | GLS2             | glutaminase 2 (liver, mitochondrial)     |
| 204947_at    | -3.23 | 0.046969 | 0.817617 | E2F1             | E2F transcription factor 1               |
| 1566979_at   | -3.63 | 0.047058 | 0.817617 |                  |                                          |
| 240827_at    | -3.4  | 0.047059 | 0.817617 | GATA3-AS1        | GATA3 antisense RNA 1                    |
| 1570261_at   | -2.47 | 0.047078 | 0.817617 | AC011997.1; BC02 | Homo sapiens, clone IMAGE:3961600, mRNA. |
| 211151_x_at  | -2.16 | 0.047106 | 0.817617 | GH1              | growth hormone 1                         |

|              |        |          |          |                  |                                                                                                                            |
|--------------|--------|----------|----------|------------------|----------------------------------------------------------------------------------------------------------------------------|
| 236705_at    | -5.43  | 0.047119 | 0.817617 | TMEM196          | transmembrane protein 196                                                                                                  |
| 223870_at    | -2.73  | 0.047158 | 0.817617 | CDRT1; FBXW10; L | CMT1A duplicated region transcript 1; F-box and WD repeat domain containing 10; F-box/WD repeat-containing protein 10-like |
| 204486_at    | -5.05  | 0.047251 | 0.817617 | KCNQ1OT1; LOC10  | KCNQ1 opposite strand/antisense transcript 1 (non-protein coding); uncharacterized LOC101927338                            |
| 1552566_at   | -4.26  | 0.047286 | 0.817617 | BTBD16           | BTB (POZ) domain containing 16                                                                                             |
| 226253_at    | 2.91   | 0.047305 | 0.817617 | LRRC45           | leucine rich repeat containing 45                                                                                          |
| 209474_s_at  | 2.17   | 0.047337 | 0.817617 | ENTPD1           | ectonucleoside triphosphate diphosphohydrolase 1                                                                           |
| 1560897_a_at | -3.63  | 0.047361 | 0.817617 | KRTAP10-11       | keratin associated protein 10-11                                                                                           |
| 226755_at    | -2.76  | 0.047388 | 0.817617 | MIR205HG         | MIR205 host gene (non-protein coding)                                                                                      |
| 220109_at    | -16.95 | 0.047413 | 0.817617 | TF               | transferrin                                                                                                                |
| 1563720_at   | 2.55   | 0.047441 | 0.817617 | BC043356         | Homo sapiens, clone IMAGE:3881224, mRNA.                                                                                   |
| 1555558_at   | -3.27  | 0.047518 | 0.817617 | USP25            | ubiquitin specific peptidase 25                                                                                            |
| 205640_at    | 2.14   | 0.047609 | 0.817617 | ALDH3B1          | aldehyde dehydrogenase 3 family, member B1                                                                                 |

|              |       |          |          |             |                                                                        |
|--------------|-------|----------|----------|-------------|------------------------------------------------------------------------|
| 238626_at    | -3.89 | 0.047616 | 0.817617 | ANKS6       | ankyrin repeat and sterile alpha motif domain containing 6             |
| 241450_at    | 4.82  | 0.047617 | 0.817617 | RSPO1       | R-spondin 1                                                            |
| 234229_at    | -2.28 | 0.047647 | 0.817617 |             |                                                                        |
| 1560325_at   | -2.2  | 0.047718 | 0.817617 |             |                                                                        |
| 207493_x_at  | -3.96 | 0.047718 | 0.817617 | SSX2; SSX2B | synovial sarcoma, X breakpoint 2;<br>synovial sarcoma, X breakpoint 2B |
| 215961_at    | -3.35 | 0.047758 | 0.817617 | F12         | coagulation factor XII (Hageman factor)                                |
| 1558549_s_at | 3.36  | 0.047823 | 0.817617 | VNN1        | vanin 1                                                                |
| 229917_at    | -2.73 | 0.04789  | 0.817617 | AGAP2       | ArfGAP with GTPase domain, ankyrin repeat and PH domain 2              |
| 239636_at    | -3.58 | 0.047891 | 0.817617 | MCF2L       | MCF.2 cell line derived transforming sequence-like                     |
| 228684_at    | -2.22 | 0.047905 | 0.817617 | ZNF503      | zinc finger protein 503                                                |
| 235137_at    | -9.44 | 0.048033 | 0.817617 | PCBP1-AS1   | PCBP1 antisense RNA 1                                                  |
| 236584_at    | 2.6   | 0.048049 | 0.817617 | C1orf86     | chromosome 1 open reading frame 86                                     |
| 240444_x_at  | 4.26  | 0.04805  | 0.817617 | CLIP1       | CAP-GLY domain containing linker protein 1                             |
| 230531_at    | -2.2  | 0.048061 | 0.817617 | KCNC3       | potassium voltage-gated channel, Shaw-related subfamily, member 3      |

|             |       |          |          |                                                                                                                                                                         |                                                     |
|-------------|-------|----------|----------|-------------------------------------------------------------------------------------------------------------------------------------------------------------------------|-----------------------------------------------------|
| 238095_at   | -3.58 | 0.048073 | 0.817617 | GATA5                                                                                                                                                                   | GATA binding protein 5                              |
| 237925_at   | -2.25 | 0.048157 | 0.817617 |                                                                                                                                                                         |                                                     |
| 210244_at   | -3.64 | 0.048278 | 0.817617 | CAMP                                                                                                                                                                    | cathelicidin antimicrobial peptide                  |
| 215118_s_at | -2.54 | 0.048308 | 0.817617 | AL928768.3; Ig alpha 1- alpha 2m=immunoglobulin A1-A2 lambda hybrid GAU heavy chain {membrane exon} [human, myeloma, mRNA Partial, 360 nt].; immunoglobulin heavy locus |                                                     |
| 242508_at   | -2.59 | 0.048319 | 0.817617 | KIAA2018                                                                                                                                                                | KIAA2018                                            |
| 224108_at   | -8.1  | 0.048351 | 0.817617 |                                                                                                                                                                         |                                                     |
| 1561545_at  | -4.75 | 0.048399 | 0.817617 | EPN2-AS1                                                                                                                                                                | EPN2 antisense RNA 1                                |
| 37892_at    | -5.97 | 0.048407 | 0.817617 | COL11A1                                                                                                                                                                 | collagen, type XI, alpha 1                          |
| 216502_at   | -2.06 | 0.048408 | 0.817617 | ISG20L2                                                                                                                                                                 | interferon stimulated exonuclease gene 20kDa-like 2 |
| 224260_at   | -2.9  | 0.048435 | 0.817617 | LQFBS-1                                                                                                                                                                 | Homo sapiens LQFBS-1 mRNA, complete cds.            |
| 232328_at   | -4.51 | 0.048474 | 0.817617 | ZNF552                                                                                                                                                                  | zinc finger protein 552                             |

|              |       |          |          |                 |                                                                                                                                                                                                                                                                                                                      |
|--------------|-------|----------|----------|-----------------|----------------------------------------------------------------------------------------------------------------------------------------------------------------------------------------------------------------------------------------------------------------------------------------------------------------------|
| 207739_s_at  | -2.01 | 0.048475 | 0.817617 | GAGE1; GAGE12B; | G antigen 1; G antigen 12B; G antigen 12C; G antigen 12D; G antigen 12E; G antigen 12F; G antigen 12G; G antigen 12H; G antigen 12I; G antigen 12J; G antigen 13; G antigen 2A; G antigen 2B; G antigen 2C; G antigen 2D; G antigen 2E; G antigen 3; G antigen 4; G antigen 5; G antigen 6; G antigen 7; G antigen 8 |
| 216156_at    | 7.65  | 0.048479 | 0.817617 | RECK            | reversion-inducing-cysteine-rich protein with kazal motifs                                                                                                                                                                                                                                                           |
| 1556296_at   | -2.05 | 0.048512 | 0.817617 |                 |                                                                                                                                                                                                                                                                                                                      |
| 1556117_at   | -4.24 | 0.048527 | 0.817617 | LINC01260       | long intergenic non-protein coding RNA 1260                                                                                                                                                                                                                                                                          |
| 241629_at    | -2.32 | 0.048637 | 0.817617 |                 |                                                                                                                                                                                                                                                                                                                      |
| 1558821_s_at | -3.67 | 0.048651 | 0.817617 | AC083843.1      |                                                                                                                                                                                                                                                                                                                      |
| 223722_at    | -3.7  | 0.048661 | 0.817617 | DNAJC12         | DnaJ (Hsp40) homolog, subfamily C, member 12                                                                                                                                                                                                                                                                         |
| 1570422_at   | -3.35 | 0.048702 | 0.817617 | SNTG2           | syntrophin, gamma 2                                                                                                                                                                                                                                                                                                  |
| 206429_at    | -2.88 | 0.048719 | 0.817617 | F2RL1           | coagulation factor II (thrombin) receptor-like 1                                                                                                                                                                                                                                                                     |

|              |       |          |          |                  |                                                                                |
|--------------|-------|----------|----------|------------------|--------------------------------------------------------------------------------|
| 233621_s_at  | 2.79  | 0.048766 | 0.817617 | ARHGEF12         | Rho guanine nucleotide exchange factor (GEF) 12                                |
| 234125_at    | -2.25 | 0.04887  | 0.817617 |                  |                                                                                |
| 1563108_at   | -4.68 | 0.048871 | 0.817617 | ELFN2; RP1-63G5. | extracellular leucine-rich repeat and fibronectin type III domain containing 2 |
| 236926_at    | -3.74 | 0.048876 | 0.817617 | TBX1             | T-box 1                                                                        |
| 236643_s_at  | -3.94 | 0.048936 | 0.817617 | LOC645321        | uncharacterized LOC645321                                                      |
| 1556511_a_at | 7.2   | 0.048973 | 0.817617 | NFIA-AS2         | NFIA antisense RNA 2                                                           |
| 213495_s_at  | 2.2   | 0.048979 | 0.817617 | RRBP1            | ribosome binding protein 1                                                     |
| 231523_at    | -4.99 | 0.04898  | 0.817617 | FGF14            | fibroblast growth factor 14                                                    |
| 1561699_a_at | -5.46 | 0.048982 | 0.817617 | ATP11A-AS1       | ATP11A antisense RNA 1                                                         |
| 1566232_at   | 4.23  | 0.04902  | 0.817617 |                  |                                                                                |
| 205212_s_at  | -2.61 | 0.049097 | 0.817617 | ACAP1            | ArfGAP with coiled-coil, ankyrin repeat and PH domains 1                       |
| 1558687_a_at | -3.23 | 0.049104 | 0.817617 | FOXN1            | forkhead box N1                                                                |
| 239977_at    | -3.7  | 0.049114 | 0.817617 | C12orf42         | chromosome 12 open reading frame 42                                            |
| 240838_s_at  | -3.4  | 0.049118 | 0.817617 | LOC145837        | uncharacterized LOC145837                                                      |
| 242285_at    | -7.93 | 0.049231 | 0.817617 |                  |                                                                                |
| 231404_at    | -3.51 | 0.04926  | 0.817617 | SPTY2D1-AS1      | SPTY2D1 antisense RNA 1                                                        |
| 233796_at    | -3.35 | 0.049309 | 0.817617 |                  |                                                                                |
| 243967_at    | 2.41  | 0.049325 | 0.817617 | AFF3             | AF4/FMR2 family, member 3                                                      |

|             |       |          |          |           |                                                                              |
|-------------|-------|----------|----------|-----------|------------------------------------------------------------------------------|
| 210464_at   | -5.06 | 0.049347 | 0.817617 | LINC00588 | long intergenic non-protein coding RNA 588                                   |
| 236761_at   | -3.65 | 0.049371 | 0.817617 | LHFPL3    | lipoma HMGIC fusion partner-like 3                                           |
| 1555369_at  | -4.86 | 0.049483 | 0.817617 | BAGE      | B melanoma antigen                                                           |
| 1557136_at  | -2.91 | 0.049581 | 0.817617 | ATP13A4   | ATPase type 13A4                                                             |
| 240586_at   | -3.44 | 0.049659 | 0.817617 | ENAM      | enamelin                                                                     |
| 244706_at   | -2.06 | 0.049668 | 0.817617 | PCMTD1    | protein-L-isoaspartate (D-aspartate) O-methyltransferase domain containing 1 |
| 207249_s_at | -2.48 | 0.049712 | 0.817617 | SLC28A2   | solute carrier family 28 (concentrative nucleoside transporter), member 2    |
| 207380_x_at | -5.74 | 0.049725 | 0.817617 | NOX1      | NADPH oxidase 1                                                              |
| 237740_at   | -2.11 | 0.049772 | 0.817617 |           |                                                                              |
| 227633_at   | 2.42  | 0.049932 | 0.817617 | RHEB      | Ras homolog enriched in brain                                                |
