# Supplementary material for: Pathway analysis with genome-wide association study (GWAS) data detected the association of atrial fibrillation with the mTOR signaling pathway
Source: PubMed Central journal article supplement — Int J Cardiol Heart Vasc. 2019 Jul 4;24:100383. doi: 10.1016/j.ijcha.2019.100383 (PMC6612921; doi:10.1016/j.ijcha.2019.100383), 2019-07-04
Supplement: mmc4.pdf [file mmc4.pdf]

Supplementary Table 2. The elements of the identified pathways through MAGENTA

| Database | Gene_Set | Gene_Symbol | Entrez_ID | Gene_p-value | Gene_Chrom_Num | Gene_Size_kb | Best_SNP_Chrom_Num | Best_SNP_Z | Best_SNP_pval |
|----------|----------|-------------|-----------|--------------|----------------|--------------|--------------------|------------|---------------|
| BIOCARTA | MTOR     | AKT1        | 207       | 6.01E-01     | 14             | 26           | 14                 | 1.8595     | 6.30E-02      |
| BIOCARTA | MTOR     | EIF4A1      | 1973      | 8.17E-02     | 17             | 6            | 17                 | 2.9134     | 3.58E-03      |
| BIOCARTA | MTOR     | EIF4A2      | 1974      | 6.38E-01     | 3              | 6            | 3                  | 2.3595     | 1.83E-02      |
| BIOCARTA | MTOR     | EIF4B       | 1975      | 1.33E-02     | 12             | 36           | 12                 | 3.5472     | 3.89E-04      |
| BIOCARTA | MTOR     | EIF4E       | 1977      | 4.28E-01     | 4              | 52           | 4                  | 2.3014     | 2.14E-02      |
| BIOCARTA | MTOR     | EIF4EBP1    | 1978      | 9.21E-01     | 8              | 30           | 8                  | 0.9996     | 3.18E-01      |
| BIOCARTA | MTOR     | EIF4G1      | 1981      | 4.72E-02     | 3              | 21           | 3                  | 3.113      | 1.85E-03      |
| BIOCARTA | MTOR     | EIF4G2      | 1982      | 2.35E-02     | 11             | 12           | 11                 | 3.3796     | 7.26E-04      |
| BIOCARTA | MTOR     | FKBP1A      | 2280      | 7.74E-01     | 20             | 24           | 20                 | 2.0784     | 3.77E-02      |
| BIOCARTA | MTOR     | MTOR        | 2475      | 2.58E-01     | 1              | 156          | 1                  | 2.6841     | 7.27E-03      |
| BIOCARTA | MTOR     | PDK2        | 5164      | 4.62E-02     | 17             | 17           | 17                 | 3.0381     | 2.38E-03      |
| BIOCARTA | MTOR     | PDPK1       | 5170      | 8.17E-01     | 16             | 65           | 16                 | 1.3404     | 1.80E-01      |
| BIOCARTA | MTOR     | PIK3CA      | 5290      | 3.70E-01     | 3              | 86           | 3                  | 2.4703     | 1.35E-02      |
| BIOCARTA | MTOR     | PIK3R1      | 5295      | 7.70E-02     | 5              | 75           | 5                  | 3.1693     | 1.53E-03      |
| BIOCARTA | MTOR     | PPP2CA      | 5515      | 3.69E-01     | 5              | 30           | 5                  | 2.3303     | 1.98E-02      |
| BIOCARTA | MTOR     | PTEN        | 5728      | 7.37E-02     | 10             | 105          | 10                 | 3.0666     | 2.17E-03      |
| BIOCARTA | MTOR     | RPS6        | 6194      | 7.62E-02     | 9              | 4            | 9                  | 3.1068     | 1.89E-03      |
| BIOCARTA | MTOR     | RPS6KB1     | 6198      | 1.95E-01     | 17             | 57           | 17                 | 2.5744     | 1.00E-02      |
| BIOCARTA | MTOR     | TSC1        | 7248      | 2.82E-02     | 9              | 53           | 9                  | 3.5264     | 4.21E-04      |
| BIOCARTA | MTOR     | TSC2        | 7249      | 8.82E-01     | 16             | 41           | 16                 | 1.3751     | 1.69E-01      |
| BIOCARTA | MTOR     | MKNK1       | 8569      | 9.16E-01     | 1              | 47           | 1                  | 1.5514     | 1.21E-01      |
| BIOCARTA | MTOR     | EIF3A       | 8661      | 2.48E-01     | 10             | 46           | 10                 | 2.7167     | 6.59E-03      |
| BIOCARTA | MTOR     | EIF4G3      | 8672      | 3.29E-01     | 1              | 371          | 1                  | 2.673      | 7.52E-03      |
| Database | Gene_Set | Gene_Symbol | Entrez_ID | Gene_p-value | Gene_Chrom_Num | Gene_Size_kb | Best_SNP_Chrom_Num | Best_SNP_Z | Best_SNP_pval |
| BIOCARTA | CTCF     | CD79A       | 973       | 7.67E-02     | 19             | 4            | 19                 | 2.8427     | 4.47E-03      |
| BIOCARTA | CTCF     | CD79B       | 974       | 2.73E-01     | 17             | 4            | 17                 | 2.4708     | 1.35E-02      |
| BIOCARTA | CTCF     | CDKN1B      | 1027      | 3.92E-02     | 12             | 5            | 12                 | 3.371      | 7.49E-04      |
| BIOCARTA | CTCF     | CDKN2A      | 1029      | 8.80E-01     | 9              | 27           | 9                  | 1.5452     | 1.22E-01      |
| BIOCARTA | CTCF     | MTOR        | 2475      | 2.58E-01     | 1              | 156          | 1                  | 2.6841     | 7.27E-03      |

|          |      |         |      |          |    |     |    |        |          |
|----------|------|---------|------|----------|----|-----|----|--------|----------|
| BIOCARTA | CTCF | SMAD1   | 4086 | 4.90E-01 | 4  | 77  | 4  | 2.3723 | 1.77E-02 |
| BIOCARTA | CTCF | SMAD4   | 4089 | 6.19E-01 | 18 | 55  | 18 | 1.9095 | 5.62E-02 |
| BIOCARTA | CTCF | SMAD5   | 4090 | 6.71E-02 | 5  | 50  | 5  | 3.1973 | 1.39E-03 |
| BIOCARTA | CTCF | MDM2    | 4193 | 1.26E-01 | 12 | 37  | 12 | 2.8858 | 3.90E-03 |
| BIOCARTA | CTCF | MYC     | 4609 | 5.77E-02 | 8  | 5   | 8  | 3.1893 | 1.43E-03 |
| BIOCARTA | CTCF | PIK3CA  | 5290 | 3.70E-01 | 3  | 86  | 3  | 2.4703 | 1.35E-02 |
| BIOCARTA | CTCF | PIK3CG  | 5294 | 2.78E-02 | 7  | 42  | 7  | 3.4234 | 6.18E-04 |
| BIOCARTA | CTCF | PIK3R1  | 5295 | 7.70E-02 | 5  | 75  | 5  | 3.1693 | 1.53E-03 |
| BIOCARTA | CTCF | PPP2CA  | 5515 | 3.69E-01 | 5  | 30  | 5  | 2.3303 | 1.98E-02 |
| BIOCARTA | CTCF | PTEN    | 5728 | 7.37E-02 | 10 | 105 | 10 | 3.0666 | 2.17E-03 |
| BIOCARTA | CTCF | RPS6KB1 | 6198 | 1.95E-01 | 17 | 57  | 17 | 2.5744 | 1.00E-02 |
| BIOCARTA | CTCF | TGFB1   | 7040 | 8.52E-02 | 19 | 23  | 19 | 2.9952 | 2.74E-03 |
| BIOCARTA | CTCF | TGFB2   | 7042 | 3.08E-01 | 1  | 99  | 1  | 2.6736 | 7.51E-03 |
| BIOCARTA | CTCF | TGFB3   | 7043 | 2.45E-01 | 14 | 24  | 14 | 2.6761 | 7.45E-03 |
| BIOCARTA | CTCF | TGFBR1  | 7046 | 8.50E-02 | 9  | 49  | 9  | 3.1528 | 1.62E-03 |
| BIOCARTA | CTCF | TGFBR2  | 7048 | 7.87E-01 | 3  | 88  | 3  | 2.1704 | 3.00E-02 |
| BIOCARTA | CTCF | TGFBR3  | 7049 | 3.51E-01 | 1  | 226 | 1  | 2.8564 | 4.29E-03 |
| BIOCARTA | CTCF | TP53    | 7157 | 5.46E-01 | 17 | 19  | 17 | 2.1342 | 3.28E-02 |
